# Supplementary material for: CHA2DS2-VASc, a Simple Clinical Score Expanding Its Boundaries To Predict Contrast Induced Acute Kidney Injury After Primary Percutaneous Coronary Interventions
Source: Research Square preprint supplement (doi:10.21203/rs.3.rs-850304/v1), 2021-09-17
Supplement: Supplementary file 1 [file 380c8a82d5ca247e29c8bbfb.xlsx]

## Sheet: Additional file 1
Son	Gender	Ageyear	AgeG	HeightCm	WeightKg	BMI	TotalIschemicTime	ERSBP	ERHRMin	RBSinER	CreatinineonArrival	KILLIPClassClass	MIType	Intubated	ArrythmiaOnPresentation	HTN	Smoking	DM	CVATIA	CHF	PVD	AccessfortheProcedure	LVEDPmmHg	LVEFLVgram	TPMImplanted	IABP	NumberOfVesselsInvolved	CulpritArtery	ThrombusGrade	VesselDiameter	LesionLength	FluroTimeMin	ContrastVolumeml	CHADSVACScore	CIN	SlowFlowNoFlow	ArrythmianeedingPharmacotherapy	AccesssiteComplications	Bleeding	CardiogenicShock	Dissection	Stroke	ReMI	Death	CHADVas2
2	Male	50	<65 years	168	76	26.9274	463	120	60	100	1.2	1	Inferior	No	Yes	No	Yes	No	No	No	No	Femoral	10	50	No	No	Two vessel disease	Right coronary artery	G2	3.25	28	7.4	90	0	No	No	No	No	No	No	No	No	No	No	<2
3	Male	60	<65 years	168	70	24.8016	335	180	90	138	1	1	Inferior	No	No	Yes	Yes	No	No	No	No	Radial	12	45	No	No	Three vessel disease	Right coronary artery	G1	3.5	15	9.4	80	1	No	No	No	No	No	No	No	No	No	No	<2
4	Male	75	65 to 75 years	170	70	24.2215	370	150	70	173	1.2	1	Inferior	No	No	No	No	No	No	No	No	Radial	16	45	No	No	Three vessel disease	Right coronary artery	G5	3.5	18	10.4	100	2	No	No	No	No	No	No	No	No	No	No	≥2
7	Male	50	<65 years	161	70	27.0051	409	120	90	118	1.1	1	Anterior	No	Yes	Yes	No	No	No	Yes	No	Radial	22	35	No	No	Three vessel disease	Proximal LAD	G4	3.5	30	9.9	100	1	No	No	No	No	No	No	No	No	No	No	<2
8	Male	59	<65 years	165	80	29.3848	515	130	110	299	0.9	1	Anterior	No	No	Yes	Yes	No	No	No	No	Radial	15	60	No	No	Two vessel disease	Proximal LAD	G2	3.5	38	10.2	120	1	No	No	No	No	No	No	No	No	No	No	<2
9	Female	48	<65 years	156	59	24.2439	576	110	85	311	1.4	2	Anterior	No	No	No	No	Yes	No	Yes	No	Radial	25	20	No	No	Single vessel disease	Non-Proximal LAD	G5	3.75	18	8.8	80	3	No	Yes	No	Yes	No	No	No	No	No	Yes	≥2
10	Male	69	65 to 75 years	165	80	29.3848	369	110	45	423	0.9	1	Inferior	No	Yes	No	No	Yes	No	No	No	Femoral	15	50	Yes	No	Single vessel disease	Right coronary artery	G5	3.5	50	12.7	120	2	No	No	No	No	No	No	No	No	No	No	≥2
12	Male	60	<65 years	164	70	26.0262	390	120	70	124	0.8	1	Anterior	No	No	Yes	No	No	No	Yes	No	Radial	20	30	No	No	Two vessel disease	Proximal LAD	G5	4	18	36	200	1	No	No	No	No	No	No	No	No	No	No	<2
13	Male	45	<65 years	172	80	27.0416	190	130	90	99	1	1	Anterior	No	No	No	Yes	No	No	No	No	Femoral	18	45	No	No	Single vessel disease	Proximal LAD	G2	3.5	22	6.8	70	0	No	Yes	No	No	No	No	No	No	No	No	<2
14	Male	70	65 to 75 years	164	78	29.0006	445	110	60	161	1	1	Inferior	No	No	No	No	No	No	No	No	Femoral	15	50	Yes	No	Single vessel disease	Right coronary artery	G5	3.75	15	10	100	1	No	No	No	No	No	No	No	No	No	No	<2
15	Male	40	<65 years	160	80	31.25	254	186	70	272	0.8	1	Inferior	No	No	Yes	Yes	Yes	No	No	No	Radial	13	45	No	No	Three vessel disease	Right coronary artery	G5	4	18	6.5	80	2	No	No	No	No	No	No	No	No	No	No	≥2
17	Male	45	<65 years	170	80	27.6817	280	120	100	118	0.9	1	Anterior	No	No	Yes	No	Yes	No	Yes	No	Radial	25	35	No	No	Single vessel disease	Proximal LAD	G5	3.5	30	18.4	130	2	No	Yes	No	No	No	No	No	No	No	No	≥2
18	Male	59	<65 years	168	85	30.1162	175	118	50	221	1.1	2	Inferior	No	Yes	No	No	Yes	No	Yes	No	Femoral	20	35	No	No	Two vessel disease	Right coronary artery	G5	3.5	72	42	180	2	No	Yes	No	No	No	No	No	No	No	No	≥2
19	Female	40	<65 years	160	65	25.3906	490	100	65	95	0.8	1	Anterior	No	No	No	No	No	No	No	No	Radial	30	45	No	No	Two vessel disease	Non-Proximal LAD	G5	4	15	9.3	100	1	No	No	No	No	No	No	No	No	No	No	<2
20	Male	49	<65 years	167	80	28.6851	310	117	30	200	1.1	1	Inferior	No	Yes	No	Yes	No	No	No	No	Femoral	11	45	Yes	No	Two vessel disease	Right coronary artery	G5	4	15	12.5	130	0	No	No	No	No	No	No	No	No	No	No	<2
21	Male	54	<65 years	160	80	31.25	420	130	80	208	1.3	1	Anterior	No	No	Yes	No	No	No	No	No	Radial	20	50	No	No	Single vessel disease	Proximal LAD	G2	3.5	38	14.1	130	1	No	Yes	No	No	No	No	No	No	No	No	<2
23	Male	40	<65 years	168	75	26.5731	116	140	70	108	0.8	1	Anterior	No	Yes	No	No	No	No	Yes	No	Femoral	25	25	No	No	Single vessel disease	Non-Proximal LAD	G5	4	15	8.7	130	0	No	Yes	No	No	No	No	No	No	No	No	<2
24	Male	48	<65 years	160	80	31.25	210	130	80	108	0.9	1	Inferior	No	No	No	No	No	No	No	No	Radial	13	60	No	No	Two vessel disease	Right coronary artery	G2	3.25	26	11.2	100	0	No	No	No	No	No	No	No	No	No	No	<2
25	Male	55	<65 years	160	81	31.6406	156	118	76	167	0.9	1	Anterior	No	No	Yes	No	No	No	No	No	Radial	18	55	No	No	Three vessel disease	Non-Proximal LAD	G3	3.25	12	8.2	120	1	No	No	No	No	No	No	No	No	No	No	<2
26	Male	56	<65 years	185	64	18.6998	510	125	80	259	1	1	Anterior	No	No	No	Yes	Yes	No	Yes	No	Radial	25	25	No	No	Two vessel disease	Proximal LAD	G3	3.5	30	8	120	1	No	No	No	No	No	No	No	No	No	No	<2
27	Male	72	65 to 75 years	172	65	21.9713	390	120	90	306	1	2	Anterior	No	No	No	Yes	Yes	No	Yes	No	Femoral	28	30	No	No	Two vessel disease	Proximal LAD	G5	3	28	20.1	260	3	No	No	No	No	No	No	No	No	No	No	≥2
28	Male	48	<65 years	170	48	16.609	475	120	78	128	1.1	2	Anterior	No	No	No	No	No	No	Yes	No	Radial	15	30	No	No	Two vessel disease	Proximal LAD	G5	4	38	12.7	130	1	No	No	No	No	No	No	No	No	No	No	<2
29	Female	55	<65 years	160	80	31.25	434	124	108	539	1.1	1	Inferior	No	No	Yes	No	Yes	No	No	No	Radial	12	55	No	No	Two vessel disease	Right coronary artery	G2	3.25	20	18.1	110	3	No	No	No	No	No	No	No	No	No	No	≥2
30	Male	61	<65 years	168	72	25.5102	200	140	80	108	0.8	1	Anterior	No	No	Yes	Yes	No	No	No	No	Radial	20	55	No	No	Single vessel disease	Proximal LAD	G3	4	38	11.8	90	1	No	Yes	No	No	No	No	No	No	No	No	<2
31	Female	70	65 to 75 years	160	65	25.3906	370	110	60	306	0.9	1	Inferior - Posterior	No	No	No	No	No	No	No	No	Radial	18	45	No	No	Single vessel disease	Right coronary artery	G5	3.5	30	12.7	110	2	No	No	No	No	No	No	No	No	No	No	≥2
32	Male	52	<65 years	169	75	26.2596	620	130	72	110	0.8	1	Anterior	No	No	No	No	No	No	No	No	Radial	15	40	No	No	Two vessel disease	Non-Proximal LAD	G5	4	18	26.9	140	0	No	No	No	No	No	No	No	No	No	No	<2
33	Male	40	<65 years	169	75	26.2596	130	150	76	150	1	2	Anterior	No	No	No	Yes	No	No	Yes	No	Femoral	18	45	No	No	Two vessel disease	Proximal LAD	G3	3.5	18	7.9	120	1	No	No	No	No	No	No	No	No	No	No	<2
34	Male	62	<65 years	169	80	28.0102	325	150	70	130	1	1	Inferior	No	No	Yes	No	Yes	No	No	No	Radial	12	45	No	No	Three vessel disease	Left circumflex	G3	3	18	12.9	140	2	No	No	No	No	No	No	No	No	No	No	≥2
35	Male	70	65 to 75 years	150	55	24.4444	390	120	80	106	1	1	Inferior	No	No	No	No	No	No	No	No	Radial	10	50	No	No	Two vessel disease	Left circumflex	G3	3.25	20	25	110	1	No	No	No	No	No	No	No	No	No	No	<2
37	Male	40	<65 years	166	85	30.8463	395	120	90	400	0.8	1	Anterior	No	No	No	No	Yes	No	Yes	No	Radial	20	30	No	No	Single vessel disease	Non-Proximal LAD	G4	3	16	18	120	1	No	Yes	No	No	No	No	No	No	No	No	<2
38	Male	44	<65 years	165	81	29.7521	225	138	81	130	1	1	Inferior	No	No	No	Yes	No	No	No	No	Radial	12	60	No	No	Single vessel disease	Proximal LAD	G2	4	18	14.2	120	0	No	No	No	No	No	No	No	No	No	No	<2
39	Male	65	65 to 75 years	175	75	24.4898	140	120	80	194	1.2	1	Anterior	No	No	No	No	No	No	Yes	No	Radial	15	30	No	No	Two vessel disease	Proximal LAD	G5	4	64	15	200	1	No	Yes	No	No	No	No	No	No	No	No	<2
40	Male	50	<65 years	166	82	29.7576	715	124	85	124	1	1	Lateral	No	No	Yes	No	No	No	No	No	Radial	15	55	No	No	Two vessel disease	Left circumflex	G2	2.75	46	14.1	150	1	No	Yes	No	No	No	No	No	No	No	No	<2
41	Male	50	<65 years	167	80	28.6851	398	120	80	157	0.9	1	Inferior	No	No	No	No	No	No	No	No	Radial	20	45	No	No	Single vessel disease	Left circumflex	G2	4	38	17.8	120	0	No	Yes	No	No	No	No	No	No	No	No	<2
42	Male	65	65 to 75 years	168	75	26.5731	231	96	51	190	1.5	1	Inferior	No	Yes	Yes	No	Yes	No	No	No	Femoral	25	40	Yes	No	Three vessel disease	Right coronary artery	G5	4	34	20	120	3	No	Yes	No	No	No	No	No	No	No	No	≥2
43	Male	46	<65 years	166	80	29.0318	115	159	55	280	0.9	2	Anterior	No	No	Yes	No	Yes	Yes	Yes	No	Radial	20	25	No	No	Two vessel disease	Non-Proximal LAD	G3	3	30	11	100	5	No	No	No	No	No	No	No	No	No	No	≥2
44	Male	67	65 to 75 years	162	70	26.6728	448	120	70	110	0.9	1	Inferior	No	No	Yes	No	No	No	No	No	Radial	10	60	No	No	Two vessel disease	Left circumflex	G3	4	22	9.7	100	2	No	No	No	No	No	No	No	No	No	No	≥2
45	Male	52	<65 years	180	80	24.6914	310	110	65	187	1	1	Anterior	No	No	No	No	Yes	No	No	No	Radial	20	45	No	No	Two vessel disease	Proximal LAD	G2	3.5	18	14.4	100	1	No	No	No	No	No	No	No	No	No	No	<2
46	Male	53	<65 years	172	90	30.4218	448	110	70	102	1.1	1	Anterior	No	No	Yes	No	No	No	Yes	No	Radial	25	30	No	No	Single vessel disease	Proximal LAD	G4	4	15	31.9	150	1	No	No	No	No	No	No	No	No	No	No	<2
48	Male	49	<65 years	173	78	26.0617	140	110	98	110	0.7	2	Anterior	No	No	No	Yes	No	No	Yes	No	Radial	25	30	No	No	Single vessel disease	Proximal LAD	G5	3.75	18	9.1	100	1	No	No	No	No	No	No	No	No	No	No	<2
49	Male	54	<65 years	170	70	24.2215	225	120	80	238	0.7	1	Inferior	No	No	No	Yes	Yes	No	No	No	Radial	13	40	No	No	Two vessel disease	Right coronary artery	G5	3.25	18	11.5	100	1	No	No	No	No	No	No	No	No	No	No	<2
51	Male	60	<65 years	170	75	25.9516	400	160	90	140	1.1	1	Anterior	No	No	Yes	No	No	No	Yes	No	Radial	18	25	No	No	Single vessel disease	Non-Proximal LAD	G5	3.5	32	11.5	140	1	No	No	No	No	No	No	No	No	No	No	<2
52	Male	50	<65 years	168	75	26.5731	470	130	90	171	0.9	1	Anterior	No	No	Yes	Yes	Yes	No	Yes	No	Radial	20	25	No	No	Single vessel disease	Proximal LAD	G5	3.75	25	13.6	110	2	No	Yes	No	No	No	No	No	No	No	No	≥2
53	Male	56	<65 years	158	80	32.0461	680	100	100	92	1.3	1	Anterior	No	No	No	No	No	Yes	Yes	No	Radial	20	30	No	No	Single vessel disease	Proximal LAD	G5	3.75	30	16.6	160	2	No	Yes	No	No	No	No	No	No	No	No	≥2
55	Male	75	65 to 75 years	168	75	26.5731	515	130	90	171	0.9	1	Anterior	No	No	Yes	Yes	Yes	No	Yes	No	Radial	20	25	No	No	Single vessel disease	Proximal LAD	G5	3.75	28	13.6	110	4	No	Yes	No	No	No	No	No	No	No	No	≥2
56	Male	52	<65 years	170	76	26.2976	275	170	58	118	1.2	1	Anterior	No	No	Yes	Yes	No	No	No	No	Radial	18	40	No	No	Single vessel disease	Proximal LAD	G5	3.25	24	13	100	1	No	Yes	No	No	No	No	No	No	No	No	<2
57	Male	50	<65 years	169	75	26.2596	670	100	70	113	1	1	Anterior	No	No	Yes	No	No	No	No	No	Radial	20	45	No	No	Single vessel disease	Non-Proximal LAD	G4	3.25	16	10.3	110	1	No	No	No	No	No	No	No	No	No	No	<2
58	Male	52	<65 years	169	75	26.2596	240	110	76	145	0.8	1	Inferior - Posterior	No	No	No	Yes	No	No	No	No	Radial	13	50	No	No	Single vessel disease	Left circumflex	G5	3	28	45.9	210	0	No	No	No	No	No	No	No	No	No	No	<2
59	Male	65	65 to 75 years	160	70	27.3438	220	100	80	129	1.1	1	Anterior	No	No	No	No	No	No	Yes	No	Radial	15	35	No	No	Three vessel disease	Proximal LAD	G3	3.5	54	10	120	1	No	Yes	No	No	No	No	No	No	No	No	<2
60	Male	47	<65 years	170	75	25.9516	410	150	52	115	1.3	1	Inferior	No	No	Yes	No	Yes	No	No	No	Femoral	18	45	Yes	No	Two vessel disease	Right coronary artery	G1	3.25	20	80	80	2	No	No	No	No	No	No	No	No	No	No	≥2
61	Female	84	>75 years	160	84	32.8125	270	110	90	140	0.7	1	Inferior - Posterior	No	No	Yes	No	No	No	No	No	Radial	15	50	No	No	Two vessel disease	Left circumflex	G4	3	16	12.3	130	4	No	No	No	No	No	No	No	No	No	No	≥2
63	Male	57	<65 years	169	70	24.5089	390	125	70	251	0.6	1	Anterior	No	No	Yes	No	Yes	No	No	No	Radial	22	45	No	No	Two vessel disease	Non-Proximal LAD	G3	3	15	11.7	120	2	No	No	No	No	No	No	No	No	No	No	≥2
65	Male	49	<65 years	170	78	26.9896	340	120	100	360	1.1	1	Inferior	No	No	Yes	No	Yes	No	No	No	Radial	20	45	No	No	Two vessel disease	Right coronary artery	G5	3.25	20	10.4	110	2	No	No	No	No	No	No	No	No	No	No	≥2
66	Male	70	65 to 75 years	168	78	27.6361	400	100	76	156	1.5	1	Inferior	No	No	Yes	No	No	No	No	No	Femoral	18	50	No	No	Three vessel disease	Right coronary artery	G5	4.5	53	24	150	2	No	No	No	No	No	No	No	No	No	No	≥2
67	Male	46	<65 years	171	80	27.3588	300	120	90	186	0.8	1	Anterior	No	No	No	No	No	No	No	No	Radial	18	40	No	No	Single vessel disease	Proximal LAD	G5	3.5	18	6.4	80	0	No	No	No	No	No	No	No	No	No	No	<2
68	Male	64	<65 years	171	78	26.6749	250	180	100	185	0.9	1	Anterior	No	No	Yes	No	Yes	No	No	No	Radial	25	36	No	No	Two vessel disease	Proximal LAD	G5	3.5	22	8.3	110	2	No	No	No	No	No	No	No	No	No	No	≥2
73	Female	69	65 to 75 years	165	68	24.977	490	120	70	130	0.7	1	Anterior	No	No	Yes	No	No	No	No	No	Radial	12	50	No	No	Two vessel disease	Proximal LAD	G3	3.75	34	23.6	160	3	No	No	No	No	No	No	No	No	No	No	≥2
75	Male	58	<65 years	171	78	26.6749	470	146	80	140	1	1	Inferior	No	No	No	No	No	No	No	No	Radial	12	50	No	No	Three vessel disease	Right coronary artery	G2	3	15	11.7	120	0	No	No	No	No	No	No	No	No	No	No	<2
77	Male	55	<65 years	172	80	27.0416	139	103	66	147	0.8	1	Inferior	No	No	Yes	No	No	No	No	No	Radial	16	46	No	No	Two vessel disease	Right coronary artery	G5	4	18	8.5	80	1	No	No	No	No	No	No	No	No	No	No	<2
78	Male	55	<65 years	165	80	29.3848	220	117	98	158	1.2	1	Inferior	No	No	Yes	No	Yes	No	No	No	Radial	15	50	No	No	Two vessel disease	Right coronary artery	G2	4.5	20	29	250	2	No	No	No	No	No	No	No	No	No	No	≥2
79	Male	49	<65 years	170	70	24.2215	530	198	78	182	1	1	Anterior	No	No	Yes	No	No	No	Yes	No	Radial	20	35	No	No	Two vessel disease	Non-Proximal LAD	G5	3.75	18	10.7	100	1	No	No	No	No	No	No	No	No	No	No	<2
84	Male	64	<65 years	168	75	26.5731	320	159	90	140	1.1	1	Inferior	No	No	No	Yes	No	No	No	No	Radial	18	45	No	No	Two vessel disease	Right coronary artery	G5	2	15	13.5	120	0	No	No	No	No	No	No	No	No	No	No	<2
85	Male	55	<65 years	159	70	27.6888	331	125	80	230	1	2	Anterior	No	No	Yes	No	Yes	No	Yes	No	Radial	20	30	No	No	Single vessel disease	Proximal LAD	G4	4	30	15	80	3	No	Yes	No	No	No	No	No	No	No	No	≥2
86	Male	50	<65 years	168	76	26.9274	463	120	60	100	1.2	1	Inferior	No	No	No	Yes	No	No	No	No	Femoral	16	50	No	No	Two vessel disease	Right coronary artery	G2	3.25	28	7.4	90	0	No	No	No	No	No	No	No	No	No	No	<2
87	Male	47	<65 years	170	80	27.6817	154	120	75	120	1.2	1	Inferior	No	No	No	Yes	No	No	No	No	Radial	10	45	No	No	Three vessel disease	Left circumflex	G4	3.25	18	13.9	120	0	No	No	No	No	No	No	No	No	No	No	<2
89	Male	60	<65 years	168	70	24.8016	335	180	90	138	1	1	Inferior	No	No	Yes	Yes	No	No	No	No	Radial	12	50	No	No	Three vessel disease	Right coronary artery	G1	3.5	15	9.4	80	1	No	No	No	No	No	No	No	No	No	No	<2
90	Male	35	<65 years	171	70	23.939	132	130	100	135	1	1	Inferior	No	No	No	No	No	No	No	No	Radial	10	40	No	No	Single vessel disease	Right coronary artery	G3	3.25	23	3	30	0	No	No	No	No	No	No	No	No	No	No	<2
91	Male	75	65 to 75 years	170	70	24.2215	370	150	70	173	1.2	1	Inferior	No	No	No	No	No	No	No	No	Radial	18	45	No	No	Three vessel disease	Right coronary artery	G5	3.5	18	10.4	100	2	No	No	No	No	No	No	No	No	No	No	≥2
92	Male	58	<65 years	170	70	24.2215	430	111	70	151	0.9	1	Inferior	No	No	Yes	No	No	No	No	No	Radial	10	50	No	No	Single vessel disease	Right coronary artery	G5	3.5	22	12.9	100	1	No	No	No	No	No	No	No	No	No	No	<2
93	Male	63	<65 years	169	74	25.9095	170	190	70	213	0.9	1	Anterior	No	No	Yes	No	Yes	No	Yes	No	Radial	18	35	No	No	Two vessel disease	Non-Proximal LAD	G5	3.25	22	12.4	90	2	No	No	No	No	No	No	No	No	No	No	≥2
95	Male	50	<65 years	168	74	26.2188	310	124	74	100	0.9	1	Inferior	No	No	No	No	No	No	No	No	Radial	15	45	No	No	Two vessel disease	Right coronary artery	G5	4	15	34.5	130	0	No	No	No	No	No	No	No	No	No	No	<2
97	Male	54	<65 years	160	80	31.25	410	80	34	113	1.5	1	Inferior	No	No	Yes	No	Yes	No	No	No	Femoral	15	40	Yes	No	Two vessel disease	Right coronary artery	G5	3	24	13	100	2	No	Yes	No	No	No	No	No	No	No	No	≥2
100	Male	38	<65 years	164	82	30.4878	560	100	90	113	1.1	1	Anterior	No	No	No	Yes	No	No	No	No	Radial	14	55	No	No	Single vessel disease	Non-Proximal LAD	G2	3.75	18	6	90	0	No	No	No	No	No	No	No	No	No	No	<2
101	Male	60	<65 years	175	84	27.4286	380	150	100	147	0.9	1	Anterior	No	No	Yes	Yes	No	No	Yes	No	Radial	20	35	No	No	Single vessel disease	Proximal LAD	G5	4	30	25.5	130	1	No	No	No	No	No	No	No	No	No	No	<2
102	Male	62	<65 years	165	85	31.2213	365	130	65	152	1.1	1	Inferior	No	No	Yes	No	Yes	No	No	No	Radial	15	45	No	No	Two vessel disease	Right coronary artery	G5	3	28	24.7	150	2	No	No	No	No	No	No	No	No	No	No	≥2
103	Male	48	<65 years	172	68	22.9854	330	134	100	130	0.8	1	Anterior	No	No	No	Yes	No	No	No	No	Radial	10	55	No	No	Three vessel disease	Non-Proximal LAD	G5	3.5	26	27.2	120	0	No	Yes	No	No	No	No	No	No	No	No	<2
104	Female	45	<65 years	165	75	27.5482	480	120	65	336	0.8	1	Inferior	No	No	Yes	No	Yes	No	No	No	Radial	10	55	No	No	Single vessel disease	Right coronary artery	G2	3.75	25	22.7	180	3	No	Yes	No	Yes	No	No	No	No	No	No	≥2
105	Male	75	65 to 75 years	169	80	28.0102	695	160	96	166	1.4	2	Anterior	No	No	No	Yes	No	No	Yes	No	Radial	22	35	No	No	Two vessel disease	Proximal LAD	G5	3.5	38	13.9	170	3	No	No	No	No	No	No	No	No	No	No	≥2
106	Male	44	<65 years	168	72	25.5102	348	144	96	140	1.3	1	Anterior	No	No	No	Yes	No	No	Yes	No	Radial	20	35	No	No	Single vessel disease	Proximal LAD	G5	3.5	34	22.9	150	0	No	No	No	No	No	No	No	No	No	No	<2
107	Male	56	<65 years	165	70	25.7117	363	130	68	140	1	1	Inferior	No	No	No	Yes	No	No	No	No	Radial	18	55	No	No	Three vessel disease	Right coronary artery	G5	4	28	7.9	80	0	No	No	No	No	No	No	No	No	No	No	<2
108	Male	59	<65 years	170	70	24.2215	169	120	70	155	1.1	1	Anterior	No	No	No	Yes	No	No	No	No	Radial	18	40	No	No	Single vessel disease	Right coronary artery	G5	3.75	30	7	100	0	No	Yes	No	No	No	No	No	No	No	No	<2
109	Male	50	<65 years	169	78	27.31	247	140	72	142	0.9	1	Inferior	No	No	No	Yes	No	No	No	No	Radial	10	50	No	No	Two vessel disease	Left circumflex	G5	3	38	15	100	0	No	No	No	No	No	No	No	No	No	No	<2
110	Female	45	<65 years	168	66	23.3844	178	117	100	140	1.3	1	Anterior	No	No	No	No	No	No	No	No	Radial	10	55	No	No	Single vessel disease	Proximal LAD	G5	3.5	15	15	90	1	No	Yes	No	No	No	No	No	No	No	No	<2
112	Female	58	<65 years	162	80	30.4832	316	136	80	230	0.7	1	Inferior	No	No	Yes	No	Yes	No	No	No	Radial	12	50	No	No	Single vessel disease	Left circumflex	G5	3.25	16	8.9	90	3	No	No	No	No	No	No	No	No	No	No	≥2
113	Male	64	<65 years	164	74	27.5134	319	130	117	155	1	1	Anterior	No	No	Yes	No	No	No	No	No	Femoral	15	45	No	No	Two vessel disease	Proximal LAD	G5	3.5	30	10	100	1	No	No	No	No	No	No	No	No	No	No	<2
114	Male	47	<65 years	165	80	29.3848	452	114	60	140	0.8	1	Inferior	No	No	No	No	No	No	No	No	Radial	10	55	No	No	Two vessel disease	Right coronary artery	G5	3.5	18	15	100	0	No	Yes	No	No	No	No	No	No	No	No	<2
117	Male	45	<65 years	172	70	23.6614	510	130	70	161	1	1	Inferior	No	No	No	Yes	No	No	No	No	Radial	12	50	No	No	Two vessel disease	Right coronary artery	G5	3.25	16	15.3	120	0	No	Yes	No	No	No	No	No	No	No	No	<2
119	Female	50	<65 years	160	75	29.2969	200	160	100	140	1.1	2	Anterior	No	No	No	No	No	No	Yes	No	Radial	20	35	No	No	Single vessel disease	Non-Proximal LAD	G5	3.25	32	34.9	160	2	No	Yes	No	No	No	No	No	No	No	No	≥2
122	Male	44	<65 years	170	80	27.6817	282	120	76	384	1	1	Lateral	No	No	No	Yes	Yes	No	No	No	Radial	10	55	No	No	Single vessel disease	Diagonal	G5	3.75	25	15.4	100	1	No	No	No	No	No	No	No	No	No	No	<2
123	Male	65	65 to 75 years	168	60	21.2585	395	110	68	230	1.4	1	Inferior	No	No	No	No	Yes	No	No	No	Radial	12	45	No	No	Two vessel disease	Left circumflex	G5	3.5	30	19	180	2	No	No	No	No	No	No	No	No	No	No	≥2
124	Male	64	<65 years	160	72	28.125	535	160	100	140	0.8	1	Inferior	No	No	No	No	No	No	No	No	Radial	15	45	No	No	Two vessel disease	Right coronary artery	G5	3	28	40	180	0	No	No	No	No	No	No	No	No	No	No	<2
126	Male	65	65 to 75 years	160	70	27.3438	194	100	80	100	1.1	1	Anterior	No	No	No	No	No	No	No	No	Radial	15	50	No	No	Single vessel disease	Proximal LAD	G1	3.75	15	11	100	1	No	No	No	No	No	No	No	No	No	No	<2
127	Male	65	65 to 75 years	160	70	27.3438	194	100	80	100	1.1	1	Anterior	No	No	No	No	No	No	No	No	Radial	15	50	No	No	Single vessel disease	Proximal LAD	G1	3.75	15	11	100	1	No	No	No	No	No	No	No	No	No	No	<2
128	Male	47	<65 years	159	70	27.6888	450	120	80	134	1.2	1	Anterior	No	No	No	Yes	No	No	Yes	No	Radial	20	30	No	No	Single vessel disease	Proximal LAD	G3	3.5	30	12.4	100	0	No	No	No	No	No	No	No	No	No	No	<2
129	Male	51	<65 years	159	70	27.6888	560	130	68	96	0.7	1	Inferior	No	No	Yes	Yes	No	No	No	No	Radial	15	40	No	No	Three vessel disease	Right coronary artery	G5	3.25	16	11	100	1	No	No	No	No	No	No	No	No	No	No	<2
132	Male	48	<65 years	170	75	25.9516	380	100	80	102	0.9	1	Anterior	No	No	No	No	No	No	Yes	No	Radial	20	25	No	No	Single vessel disease	Proximal LAD	G5	3.75	38	12.4	130	0	No	No	No	No	No	No	No	No	No	No	<2
133	Male	51	<65 years	240	90	15.625	368	140	76	101	0.9	1	Anterior	No	No	Yes	No	No	No	No	No	Femoral	20	40	No	No	Single vessel disease	Non-Proximal LAD	G5	3.5	30	13.4	100	1	No	Yes	No	No	No	No	No	No	No	No	<2
135	Male	60	<65 years	168	70	24.8016	293	160	68	135	0.9	1	Inferior	No	No	Yes	No	No	No	No	No	Radial	10	45	No	No	Two vessel disease	Right coronary artery	G5	3.5	32	9.4	100	1	No	No	No	No	No	No	No	No	No	No	<2
138	Male	42	<65 years	170	80	27.6817	410	110	70	124	0.9	1	Anterior	No	No	Yes	No	No	No	No	No	Radial	25	40	No	No	Single vessel disease	Proximal LAD	G5	3.5	28	34.3	160	1	No	Yes	No	No	No	No	No	No	No	No	<2
140	Male	40	<65 years	170	85	29.4118	490	140	80	230	1.3	1	Anterior	No	No	No	No	Yes	No	Yes	No	Radial	18	35	No	No	Single vessel disease	Proximal LAD	G5	3.25	32	13.5	110	1	No	No	No	No	No	No	No	No	No	No	<2
141	Female	60	<65 years	168	80	28.3447	338	160	72	242	1.1	1	Inferior	No	No	Yes	No	Yes	No	No	No	Radial	12	50	No	No	Three vessel disease	Left circumflex	G5	3.5	15	10	100	3	Yes	No	No	No	No	No	No	No	No	No	≥2
142	Male	52	<65 years	164	75	27.8852	440	140	128	118	1.3	2	Anterior	No	No	Yes	No	No	No	Yes	No	Radial	40	25	No	No	Two vessel disease	Proximal LAD	G5	3	32	9	110	2	No	Yes	No	No	No	No	No	No	No	No	≥2
147	Male	40	<65 years	170	74	25.6055	320	100	60	146	0.9	1	Inferior with RV	No	No	No	No	No	No	No	No	Radial	12	55	No	No	Single vessel disease	Right coronary artery	G5	3	20	8.9	90	0	No	No	No	No	No	No	No	No	No	No	<2
149	Male	54	<65 years	165	70	25.7117	600	110	74	217	1	2	Anterior	No	No	No	No	No	No	Yes	No	Femoral	20	30	No	No	Two vessel disease	Proximal LAD	G3	3.5	18	12.8	110	1	No	Yes	No	No	No	No	No	No	No	No	<2
151	Male	48	<65 years	160	75	29.2969	240	150	78	147	0.9	1	Inferior	No	No	Yes	No	No	No	No	No	Radial	10	50	No	No	Two vessel disease	Right coronary artery	G5	3	30	14.4	120	1	No	No	No	No	No	No	No	No	No	No	<2
152	Male	51	<65 years	#NULL!	#NULL!	#NULL!	90	110	75	140	1.1	1	Anterior	No	No	No	Yes	No	No	Yes	No	Radial	20	35	No	No	Single vessel disease	Proximal LAD	G3	3.5	18	10.3	100	0	No	Yes	No	No	No	No	No	No	No	No	<2
154	Male	63	<65 years	170	70	24.2215	575	160	98	125	1.1	1	Anterior	No	No	No	Yes	No	No	No	No	Radial	20	45	No	No	Three vessel disease	Proximal LAD	G1	3.75	34	30.3	200	0	No	No	No	No	No	No	No	No	No	No	<2
158	Female	65	65 to 75 years	160	60	23.4375	570	140	60	140	1	2	Anterior	No	Yes	Yes	No	No	No	Yes	No	Femoral	23	30	No	No	Single vessel disease	Non-Proximal LAD	G4	3.25	38	14	160	4	No	Yes	No	No	No	No	No	No	No	No	≥2
160	Male	55	<65 years	168	75	26.5731	450	140	98	140	1.1	1	Inferior	No	Yes	Yes	Yes	No	No	No	No	Radial	18	45	No	No	Two vessel disease	Left circumflex	G5	3.25	16	21.4	200	1	No	No	No	No	No	No	No	No	No	No	<2
161	Male	65	65 to 75 years	170	85	29.4118	140	161	80	140	1.1	2	Anterior	No	No	Yes	No	No	No	Yes	No	Femoral	18	35	Yes	No	Three vessel disease	Proximal LAD	G5	3.5	28	10.1	70	3	No	Yes	No	No	No	No	No	No	No	No	≥2
162	Male	62	<65 years	177	80	25.5354	280	160	78	140	0.8	1	Anterior	No	No	No	No	No	No	Yes	No	Radial	18	35	No	No	Single vessel disease	Proximal LAD	G5	3.75	30	16.7	140	0	No	Yes	No	No	No	No	No	No	No	No	<2
163	Male	46	<65 years	175	55	17.9592	230	130	120	113	0.8	1	Anterior	No	No	No	Yes	No	No	Yes	No	Radial	18	25	No	No	Two vessel disease	Proximal LAD	G3	3.5	22	36	160	0	No	No	No	No	No	No	No	No	No	No	<2
167	Male	85	>75 years	175	85	27.7551	220	140	65	173	1.2	1	Inferior	No	No	Yes	No	No	No	No	No	Radial	18	55	No	No	Two vessel disease	Right coronary artery	G3	3.75	60	27	190	3	No	Yes	No	No	No	No	No	No	No	No	≥2
169	Male	29	<65 years	#NULL!	#NULL!	#NULL!	90	100	90	127	0.8	1	Anterior	No	No	No	Yes	No	No	No	No	Radial	20	40	No	No	Single vessel disease	Proximal LAD	G3	3.75	32	21.8	160	0	No	No	No	No	No	No	No	No	No	No	<2
171	Male	80	>75 years	#NULL!	#NULL!	#NULL!	240	150	80	154	1.1	3	Anterior	Yes	No	No	No	No	No	Yes	No	Femoral	15	35	No	No	Three vessel disease	Non-Proximal LAD	G5	3	16	23	120	3	Yes	Yes	No	No	No	No	No	No	No	No	≥2
172	Male	63	<65 years	#NULL!	#NULL!	#NULL!	600	100	80	164	0.9	1	Inferior	No	No	Yes	No	No	No	No	No	Radial	15	45	No	No	Three vessel disease	Right coronary artery	G4	3	15	12.3	100	1	No	Yes	No	No	No	No	No	No	No	No	<2
178	Male	55	<65 years	160	100	39.0625	338	160	94	216	0.9	1	Inferior	No	Yes	Yes	No	Yes	No	No	No	Femoral	15	45	No	No	Single vessel disease	Left circumflex	G2	3.25	22	8	120	2	No	No	No	No	No	No	No	No	No	No	≥2
180	Female	55	<65 years	#NULL!	#NULL!	#NULL!	400	140	99	141	0.6	1	Anterior	Yes	No	No	No	No	No	Yes	No	Femoral	16	35	No	No	Single vessel disease	Proximal LAD	G5	3	30	26.5	170	1	No	Yes	No	No	No	No	No	No	No	No	<2
181	Female	50	<65 years	165	70	25.7117	330	100	81	250	1.5	1	Inferior with RV	No	No	No	No	Yes	No	No	No	Femoral	12	40	No	No	Two vessel disease	Right coronary artery	G5	4	50	12.7	129	2	No	Yes	No	No	No	No	No	No	No	No	≥2
182	Female	45	<65 years	160	65	25.3906	545	140	88	504	1	1	Inferior	No	No	No	No	Yes	No	No	No	Femoral	17	50	No	No	Three vessel disease	Left circumflex	G5	3	16	15	100	2	No	Yes	No	No	No	No	No	No	No	No	≥2
186	Female	64	<65 years	165	60	22.0386	250	160	88	325	1.2	1	Inferior	No	No	Yes	No	Yes	No	No	No	Radial	10	50	No	No	Three vessel disease	Right coronary artery	G3	3.5	28	33	200	3	No	No	No	No	No	No	No	No	No	No	≥2
187	Male	50	<65 years	169	75	26.2596	320	120	120	179	0.8	1	Anterior	No	No	No	No	Yes	No	No	No	Radial	18	40	No	No	Single vessel disease	Non-Proximal LAD	G2	3.25	32	12.5	130	1	No	No	No	No	No	No	No	No	No	No	<2
189	Male	42	<65 years	175	85	27.7551	110	160	83	103	0.8	1	Anterior	No	No	No	No	No	No	Yes	No	Radial	16	35	No	No	Two vessel disease	Proximal LAD	G5	3.5	38	11.1	120	0	No	No	No	No	No	No	No	No	No	No	<2
191	Male	86	>75 years	176	70	22.5981	220	80	70	209	1.5	1	Inferior with RV	No	No	Yes	Yes	No	No	No	No	Femoral	15	50	Yes	No	Three vessel disease	Right coronary artery	G3	3.25	28	11.7	100	3	No	No	No	No	No	No	No	No	No	No	≥2
192	Male	55	<65 years	170	55	19.0311	510	123	89	305	0.7	1	Inferior with RV	No	No	No	No	Yes	No	No	No	Radial	16	55	No	No	Two vessel disease	Right coronary artery	G1	3.75	26	9.5	100	1	No	No	No	No	No	No	No	No	No	No	<2
193	Male	45	<65 years	174	90	29.7265	230	138	70	147	0.7	1	Inferior	No	Yes	Yes	No	Yes	No	No	No	Femoral	18	55	Yes	No	Single vessel disease	Right coronary artery	G5	3.5	24	14	80	2	No	No	No	No	No	No	No	No	No	No	≥2
194	Female	45	<65 years	150	68	30.2222	382	140	76	112	0.6	1	Inferior	No	Yes	Yes	Yes	No	No	Yes	No	Femoral	20	35	No	No	Three vessel disease	Right coronary artery	G5	3.25	38	5.6	130	2	No	No	No	No	No	No	No	No	No	No	≥2
196	Male	46	<65 years	170	65	22.4913	550	157	50	106	0.9	1	Inferior with RV	No	No	No	Yes	No	No	No	No	Radial	15	60	No	No	Single vessel disease	Left circumflex	G5	3.25	22	13.4	100	0	No	No	No	No	No	No	No	No	No	No	<2
197	Male	68	65 to 75 years	165	60	22.0386	560	140	100	97	0.6	1	Anterior	No	No	No	No	No	No	Yes	No	Radial	20	25	No	No	Three vessel disease	Proximal LAD	G5	3.25	20	20.5	100	1	No	No	No	No	No	No	No	No	No	No	<2
200	Male	53	<65 years	175	104	33.9592	140	117	84	281	0.8	1	Inferior	No	No	No	Yes	Yes	No	No	No	Radial	12	50	No	No	Single vessel disease	Right coronary artery	G4	3.5	12	14.5	100	1	No	No	No	No	No	No	No	No	No	No	<2
201	Male	60	<65 years	172	60	20.2812	310	150	60	200	0.7	1	Inferior with RV	No	No	Yes	No	Yes	No	No	No	Radial	16	50	No	No	Single vessel disease	Right coronary artery	G5	3.5	15	12	80	2	No	Yes	No	No	No	No	No	No	No	No	≥2
202	Female	45	<65 years	160	65	25.3906	500	130	82	123	0.8	1	Anterior	No	No	Yes	No	No	No	No	No	Radial	18	40	No	No	Two vessel disease	Proximal LAD	G3	3.5	28	9.5	90	2	No	No	No	No	No	No	No	No	No	No	≥2
203	Female	48	<65 years	160	110	42.9688	420	180	76	230	0.6	1	Anterior	No	No	Yes	No	Yes	No	Yes	No	Radial	18	35	No	No	Two vessel disease	Proximal LAD	G5	4	18	14.4	120	3	No	No	No	No	No	No	No	No	No	No	≥2
204	Male	38	<65 years	168	70	24.8016	140	110	106	108	0.7	2	Anterior	Yes	Yes	No	Yes	No	No	Yes	No	Femoral	20	30	No	No	Two vessel disease	Proximal LAD	G5	3.5	16	10.2	60	1	No	Yes	No	No	No	No	No	No	No	No	<2
207	Male	58	<65 years	175	82	26.7755	230	100	120	120	0.9	2	Anterior	No	No	Yes	No	Yes	No	Yes	No	Radial	25	35	No	No	Single vessel disease	Non-Proximal LAD	G5	3.25	28	12.4	100	3	No	No	No	No	No	No	No	No	No	No	≥2
208	Female	54	<65 years	163	75	28.2284	480	90	100	130	0.6	3	Anterior	Yes	No	Yes	No	Yes	No	Yes	No	Femoral	30	20	No	Yes	Two vessel disease	Proximal LAD	G5	3	18	4.2	80	4	No	No	No	No	No	No	No	No	No	No	≥2
211	Male	45	<65 years	168	70	24.8016	516	130	80	130	0.8	1	Posterior	No	No	No	No	No	No	No	No	Radial	15	45	No	No	Single vessel disease	Left circumflex	G3	3.5	16	19.4	70	0	No	No	No	No	No	No	No	No	No	No	<2
216	Male	69	65 to 75 years	170	80	27.6817	260	130	92	112	1.1	1	Inferior	No	No	Yes	No	No	No	No	No	Radial	15	45	No	No	Two vessel disease	Right coronary artery	G3	3.5	28	12	80	2	No	No	No	No	No	No	No	No	No	No	≥2
217	Male	55	<65 years	172	90	30.4218	585	100	60	128	1.4	1	Inferior with RV	No	No	No	No	Yes	No	No	No	Femoral	15	40	No	No	Two vessel disease	Right coronary artery	G5	3.5	21	23.4	150	1	Yes	Yes	No	No	No	No	No	No	No	No	<2
218	Male	65	65 to 75 years	168	73	25.8645	270	130	80	160	1.5	1	Inferior with RV	No	No	Yes	No	Yes	No	Yes	No	Radial	20	35	No	No	Three vessel disease	Right coronary artery	G3	3.5	36	22.9	160	3	Yes	No	No	No	No	No	No	No	No	No	≥2
220	Female	45	<65 years	160	75	29.2969	330	110	90	200	0.6	1	Anterior	No	No	Yes	No	Yes	No	Yes	No	Radial	18	35	No	No	Single vessel disease	Non-Proximal LAD	G3	3.5	38	10.3	130	3	No	No	No	No	No	No	No	No	No	No	≥2
222	Male	46	<65 years	170	65	22.4913	185	113	92	90	0.6	1	Anterior	No	No	No	No	No	No	No	No	Femoral	20	45	No	No	Single vessel disease	Proximal LAD	G3	3.75	32	8.2	100	0	No	No	No	No	No	No	No	No	No	No	<2
224	Female	73	65 to 75 years	164	70	26.0262	350	110	70	230	1.5	1	Inferior with RV	Yes	No	Yes	No	Yes	No	No	No	Radial	20	50	No	No	Three vessel disease	Right coronary artery	G5	3.5	16	5	60	4	Yes	Yes	No	No	No	No	No	No	No	Yes	≥2
225	Male	72	65 to 75 years	170	78	26.9896	310	152	110	324	0.9	3	Anterior	Yes	Yes	Yes	No	Yes	No	Yes	No	Femoral	40	20	No	Yes	Two vessel disease	Left main	G4	3.5	44	18	150	4	Yes	Yes	No	No	No	No	No	No	No	No	≥2
229	Female	45	<65 years	160	75	29.2969	370	110	90	200	0.6	1	Anterior	No	No	Yes	No	No	No	Yes	No	Radial	18	35	No	No	Single vessel disease	Non-Proximal LAD	G4	3.5	38	10.3	130	2	No	No	No	No	No	No	No	No	No	No	≥2
230	Male	46	<65 years	175	85	27.7551	195	110	78	160	0.9	1	Inferior	No	No	No	No	No	No	No	No	Radial	10	45	No	No	Two vessel disease	Left circumflex	G2	3.25	15	22.6	180	0	No	No	No	No	No	No	No	No	No	No	<2
235	Male	40	<65 years	170	80	27.6817	275	110	96	167	1.1	1	Anterior	No	No	No	No	No	No	Yes	No	Radial	14	35	No	No	Two vessel disease	Proximal LAD	G5	3.25	18	7.6	100	0	No	No	No	No	No	No	No	No	No	No	<2
236	Male	80	>75 years	168	80	28.3447	470	180	88	140	1.2	1	Inferior	No	No	No	No	No	No	No	No	Radial	13	50	No	No	Three vessel disease	Left circumflex	G5	3.25	28	40.6	150	2	No	No	No	No	No	No	No	No	No	No	≥2
240	Male	54	<65 years	168	80	28.3447	310	160	88	168	1	1	Anterior	No	No	No	Yes	No	Yes	Yes	No	Radial	18	35	No	No	Single vessel disease	Non-Proximal LAD	G5	3.75	26	9.3	110	2	No	No	No	No	No	No	No	No	No	No	≥2
242	Male	70	65 to 75 years	169	75	26.2596	600	130	80	140	0.8	1	Anterior	No	No	No	No	No	No	Yes	No	Femoral	12	30	No	No	Single vessel disease	Proximal LAD	G1	4	15	21.3	130	1	No	Yes	No	No	No	No	No	No	No	No	<2
246	Female	46	<65 years	168	85	30.1162	240	150	90	136	0.8	1	Inferior	No	No	Yes	No	Yes	No	No	No	Femoral	20	45	No	No	Three vessel disease	Right coronary artery	G1	3.75	15	8.1	90	3	No	No	No	No	No	No	No	No	No	No	≥2
247	Male	38	<65 years	#NULL!	#NULL!	#NULL!	310	140	86	230	0.7	1	Inferior with RV	No	No	No	No	Yes	No	No	No	Radial	17	45	No	No	Three vessel disease	Right coronary artery	G5	3.5	58	13.2	120	1	No	No	No	No	No	No	No	No	No	No	<2
248	Male	40	<65 years	180	85	26.2346	405	140	84	334	0.6	1	Inferior	No	No	No	No	Yes	No	Yes	No	Radial	15	35	No	No	Three vessel disease	Right coronary artery	G3	3.5	23	18.5	130	1	No	No	No	No	No	No	No	No	No	No	<2
249	Male	60	<65 years	#NULL!	#NULL!	#NULL!	420	150	74	170	0.9	1	Inferior	No	No	Yes	No	No	No	No	No	Radial	17	45	No	No	Single vessel disease	Right coronary artery	G5	3.75	38	36	200	1	No	No	No	No	No	No	No	No	No	No	<2
250	Male	46	<65 years	170	67	23.1834	205	110	80	140	1	1	Anterior	No	No	No	Yes	No	No	No	No	Femoral	19	45	No	No	Single vessel disease	Non-Proximal LAD	G2	3.75	32	8.3	100	0	No	No	No	No	No	No	No	No	No	No	<2
252	Male	50	<65 years	175	85	27.7551	180	110	85	72	1.1	1	Anterior	No	No	No	No	Yes	No	Yes	No	Radial	11	35	No	No	Two vessel disease	Non-Proximal LAD	G5	3.25	30	16.2	100	1	No	No	No	No	No	No	No	No	No	No	<2
254	Male	45	<65 years	170	70	24.2215	440	140	107	188	0.9	1	Anterior	No	No	No	No	No	No	Yes	No	Radial	15	35	No	No	Single vessel disease	Proximal LAD	G5	3.5	18	11.6	100	0	No	Yes	No	No	No	No	No	No	No	No	<2
258	Female	70	65 to 75 years	175	70	22.8571	115	140	90	120	0.7	2	Anterior	No	No	Yes	No	No	No	Yes	No	Radial	18	40	No	No	Single vessel disease	Non-Proximal LAD	G5	3.25	38	17	150	4	No	No	No	No	No	No	No	No	No	No	≥2
260	Male	53	<65 years	170	80	27.6817	340	170	90	190	0.8	1	Inferior	No	No	Yes	No	Yes	No	No	No	Radial	15	45	No	No	Single vessel disease	Left circumflex	G5	3	15	9.7	80	2	No	No	No	No	No	No	No	No	No	No	≥2
262	Male	70	65 to 75 years	170	75	25.9516	670	130	86	100	0.6	1	Anterior	No	No	Yes	Yes	No	No	Yes	No	Radial	20	30	No	No	Single vessel disease	Non-Proximal LAD	G5	3.25	38	10.4	110	2	No	No	No	No	No	No	No	No	No	No	≥2
263	Male	81	>75 years	168	70	24.8016	500	120	100	164	1.2	1	Inferior with RV	No	No	Yes	No	No	No	No	No	Radial	12	45	No	No	Single vessel disease	Right coronary artery	G5	3.5	21	16.1	100	3	Yes	No	No	No	No	No	No	No	No	No	≥2
268	Female	72	65 to 75 years	164	68	25.2826	305	130	80	220	1.3	1	Anterior	No	No	Yes	No	No	No	Yes	No	Femoral	25	35	No	No	Single vessel disease	Proximal LAD	G5	3.75	28	19.7	150	3	Yes	No	Yes	No	No	No	No	No	No	No	≥2
269	Male	52	<65 years	170	72	24.9135	550	140	100	159	0.9	1	Inferior	No	No	Yes	Yes	No	No	No	No	Radial	12	45	No	No	Single vessel disease	Right coronary artery	G5	3.5	28	27.5	120	1	No	No	No	No	No	No	No	No	No	No	<2
270	Male	48	<65 years	165	75	27.5482	390	130	74	235	0.9	1	Anterior	No	No	No	Yes	No	No	Yes	No	Radial	20	35	No	No	Two vessel disease	Proximal LAD	G5	3.5	26	48	200	0	No	Yes	No	No	No	No	No	No	No	No	<2
278	Female	46	<65 years	#NULL!	#NULL!	#NULL!	200	130	80	190	0.9	1	Posterior	Yes	No	Yes	No	No	No	No	No	Radial	15	45	Yes	No	Three vessel disease	Left circumflex	G5	3.25	28	23	100	2	No	No	Yes	No	No	No	No	No	No	Yes	≥2
286	Male	72	65 to 75 years	165	75	27.5482	475	100	110	170	1.4	1	Inferior	No	No	No	No	Yes	No	Yes	Yes	Femoral	10	15	Yes	No	Three vessel disease	Right coronary artery	G3	3	64	14	100	3	No	No	No	No	Yes	No	No	No	No	No	≥2
287	Male	41	<65 years	156	90	36.9822	456	120	96	118	0.9	1	Anterior	No	No	Yes	No	No	No	No	No	Radial	20	60	No	No	Three vessel disease	Proximal LAD	G3	3.75	38	3.5	140	1	No	No	No	No	No	No	No	No	No	No	<2
289	Female	65	65 to 75 years	160	68	26.5625	460	110	80	156	1.3	1	Inferior with RV	No	No	Yes	No	No	No	No	No	Radial	20	60	No	No	Three vessel disease	Right coronary artery	G4	3	12	17.6	100	3	No	No	No	No	No	No	No	No	No	No	≥2
291	Female	67	65 to 75 years	165	60	22.0386	270	90	88	230	1.4	1	Inferior	No	No	Yes	No	Yes	No	No	No	Femoral	12	60	Yes	No	Three vessel disease	Right coronary artery	G5	3	32	11.3	80	4	Yes	Yes	No	No	No	No	No	No	No	No	≥2
293	Male	41	<65 years	170	78	26.9896	410	130	90	324	0.7	1	Inferior	No	No	Yes	Yes	No	No	Yes	No	Radial	13	35	No	No	Two vessel disease	Right coronary artery	G5	4	24	11.9	90	1	No	Yes	No	No	No	No	No	No	No	No	<2
295	Male	40	<65 years	175	80	26.1224	77	140	80	130	0.8	1	Anterior	No	No	No	No	No	No	No	No	Radial	15	40	No	No	Single vessel disease	Proximal LAD	G4	4	18	5.4	90	0	No	No	Yes	No	No	No	No	No	No	No	<2
300	Male	54	<65 years	167	80	28.6851	190	150	60	130	0.9	1	Anterior	No	No	No	No	No	No	Yes	No	Radial	13	35	No	No	Single vessel disease	Non-Proximal LAD	G5	3.25	12	10.7	70	0	No	No	No	No	No	No	No	No	No	No	<2
301	Male	54	<65 years	167	80	28.6851	190	150	60	130	0.9	1	Anterior	No	No	No	No	No	No	Yes	No	Radial	13	35	No	No	Single vessel disease	Non-Proximal LAD	G5	3.25	12	10.7	70	0	No	No	No	No	No	No	No	No	No	No	<2
306	Male	62	<65 years	170	72	24.9135	450	160	80	135	0.8	1	Posterior	No	No	Yes	No	No	No	No	No	Radial	13	45	No	No	Three vessel disease	Left circumflex	G5	3.25	16	10.7	110	1	No	No	No	No	No	No	No	No	No	No	<2
309	Male	40	<65 years	178	100	31.5617	445	137	96	113	1	1	Anterior	No	No	Yes	Yes	No	No	No	No	Radial	20	40	No	No	Single vessel disease	Proximal LAD	G3	3.75	38	9.2	100	1	No	No	No	No	No	No	No	No	No	No	<2
310	Male	50	<65 years	160	70	27.3438	540	140	80	113	0.8	1	Inferior with RV	No	No	Yes	No	Yes	No	No	No	Radial	12	45	No	No	Two vessel disease	Right coronary artery	G5	3.75	24	7.3	150	2	No	No	No	No	No	No	No	No	No	No	≥2
313	Male	60	<65 years	175	65	21.2245	330	139	100	140	1	1	Inferior	No	No	No	Yes	No	No	No	No	Radial	16	50	No	No	Two vessel disease	Right coronary artery	G5	3.5	24	9.1	110	0	No	No	No	No	No	No	No	No	No	No	<2
317	Male	45	<65 years	170	70	24.2215	268	120	110	140	0.6	2	Anterior	No	No	Yes	No	No	No	Yes	No	Radial	18	20	No	No	Single vessel disease	Proximal LAD	G5	4.5	16	27	150	2	No	No	Yes	No	No	No	No	No	No	No	≥2
319	Male	69	65 to 75 years	165	89	32.6905	370	110	45	423	0.9	1	Inferior - Posterior	Yes	Yes	No	No	Yes	No	No	No	Femoral	15	50	Yes	No	Single vessel disease	Right coronary artery	G5	3.25	50	12.7	120	2	Yes	No	No	No	No	No	No	No	No	No	≥2
322	Male	70	65 to 75 years	176	90	29.0548	180	160	70	149	1.3	1	Lateral	No	No	Yes	No	Yes	No	No	No	Radial	12	60	No	No	Two vessel disease	Diagonal	G5	3.25	27	14.4	130	3	No	No	No	No	No	No	No	No	No	No	≥2
325	Male	65	65 to 75 years	168	98	34.7222	700	120	70	138	1.4	1	Anterior	No	Yes	No	No	No	No	No	No	Femoral	20	40	No	No	Three vessel disease	Proximal LAD	G3	3.25	40	30.7	200	1	Yes	Yes	No	No	No	No	No	No	No	No	<2
327	Male	59	<65 years	165	80	29.3848	500	130	110	299	0.9	1	Anterior	No	No	Yes	Yes	No	No	No	No	Radial	15	60	No	No	Two vessel disease	Proximal LAD	G3	3.5	38	10.2	120	1	Yes	No	No	No	No	No	No	No	No	No	<2
329	Male	67	65 to 75 years	170	65	22.4913	540	160	110	176	1.4	3	Inferior	Yes	No	No	Yes	No	No	Yes	No	Femoral	25	30	No	No	Three vessel disease	Left circumflex	G5	3	18	30.8	200	2	Yes	No	No	No	No	No	No	No	No	No	≥2
330	Male	61	<65 years	170	73	25.2595	90	130	70	226	1	1	Inferior with RV	No	No	No	No	Yes	No	No	No	Radial	12	55	No	No	Two vessel disease	Right coronary artery	G1	3.25	20	13	90	1	No	No	No	No	No	No	No	No	No	No	<2
334	Male	65	65 to 75 years	169	80	28.0102	378	120	40	138	0.9	1	Inferior with RV	No	Yes	Yes	Yes	No	No	Yes	No	Femoral	25	35	Yes	No	Three vessel disease	Right coronary artery	G5	3	18	8	90	2	No	No	No	No	No	No	No	No	No	No	≥2
335	Male	50	<65 years	171	78	26.6749	237	120	90	140	0.9	1	Anterior	No	No	Yes	No	No	No	Yes	No	Radial	20	35	No	No	Single vessel disease	Non-Proximal LAD	G1	3.75	20	7.3	80	1	No	No	No	No	No	No	No	No	No	No	<2
336	Male	35	<65 years	170	65	22.4913	440	136	110	159	1.1	3	Anterior	No	No	No	No	No	No	Yes	No	Femoral	30	25	No	Yes	Single vessel disease	Proximal LAD	G5	4	15	7.3	80	1	No	No	No	No	No	No	No	No	No	No	<2
341	Female	50	<65 years	165	60	22.0386	355	150	75	226	0.8	1	Inferior - Posterior	No	No	Yes	No	Yes	No	No	No	Radial	15	40	No	No	Single vessel disease	Left circumflex	G5	3.5	16	13	90	3	No	No	No	No	No	No	No	No	No	No	≥2
345	Male	46	<65 years	175	70	22.8571	270	140	60	160	1.2	1	Anterior	No	No	No	No	No	No	No	No	Radial	20	50	No	No	Single vessel disease	Non-Proximal LAD	G5	3.75	28	12	80	0	No	No	No	No	No	No	No	No	No	No	<2
348	Male	54	<65 years	170	78	26.9896	100	120	70	130	0.9	1	Anterior	No	No	Yes	No	No	No	Yes	No	Radial	20	25	No	No	Single vessel disease	Left main	G5	3.5	56	27.5	200	1	No	No	No	No	No	No	No	No	No	No	<2
350	Female	95	>75 years	160	60	23.4375	400	117	50	188	0.9	1	Inferior with RV	No	Yes	No	No	Yes	No	No	No	Femoral	10	40	Yes	No	Two vessel disease	Right coronary artery	G5	3.75	22	12.8	110	4	No	No	No	Yes	No	No	No	No	No	No	≥2
351	Male	45	<65 years	180	72	22.2222	240	120	70	146	1	1	Inferior with RV	No	No	Yes	No	No	No	No	No	Radial	15	40	No	No	Three vessel disease	Right coronary artery	G5	3.25	24	7.3	100	1	No	No	No	No	No	No	No	No	No	No	<2
352	Male	52	<65 years	160	80	31.25	380	100	140	140	1	3	Anterior	Yes	No	Yes	No	Yes	No	Yes	No	Femoral	30	30	No	Yes	Two vessel disease	Left main	G5	3.5	30	12.1	150	3	No	No	Yes	No	No	No	No	No	No	No	≥2
355	Female	50	<65 years	161	60	23.1473	350	110	80	230	0.8	1	Inferior - Posterior	No	No	Yes	No	Yes	No	No	No	Radial	15	40	No	No	Single vessel disease	Left circumflex	G5	3.5	16	13	100	3	No	No	No	No	No	No	No	No	No	No	≥2
356	Male	46	<65 years	160	75	29.2969	480	110	68	100	1.2	2	Anterior	No	No	Yes	No	No	No	Yes	No	Femoral	20	40	No	No	Single vessel disease	Proximal LAD	G5	3.5	16	9.2	150	2	No	Yes	No	No	No	No	No	No	No	No	≥2
359	Male	67	65 to 75 years	169	80	28.0102	260	100	90	150	1.4	3	Inferior - Posterior	Yes	No	Yes	No	Yes	No	Yes	No	Femoral	30	30	No	No	Three vessel disease	Left circumflex	G5	3	18	30.8	200	4	Yes	No	No	No	No	No	No	No	No	No	≥2
361	Male	57	<65 years	170	82	28.3737	180	120	30	202	0.8	1	Inferior with RV	No	Yes	Yes	Yes	Yes	No	No	No	Femoral	11	45	Yes	No	Two vessel disease	Right coronary artery	G5	3.5	32	11.2	150	2	No	No	Yes	No	No	No	No	No	No	No	≥2
362	Male	45	<65 years	171	72	24.623	315	100	90	230	0.7	1	Inferior with RV	No	No	No	Yes	Yes	No	No	No	Radial	11	50	No	No	Single vessel disease	Right coronary artery	G5	3.5	24	16.9	110	1	No	No	No	No	No	No	No	No	No	No	<2
363	Male	29	<65 years	169	105	36.7634	220	110	88	89	1	1	Anterior	No	No	No	Yes	No	No	No	No	Radial	11	45	No	No	Single vessel disease	Proximal LAD	G1	4	18	20.7	100	0	No	No	No	No	No	No	No	No	No	No	<2
365	Male	40	<65 years	165	65	23.8751	440	140	78	140	0.8	1	Inferior with RV	No	No	No	No	No	No	No	No	Radial	25	40	No	No	Single vessel disease	Right coronary artery	G5	4.5	28	16.8	100	0	No	No	No	No	No	No	No	No	No	No	<2
366	Male	53	<65 years	165	68	24.977	180	170	100	198	0.7	1	Anterior	No	No	No	Yes	No	No	No	No	Femoral	15	40	No	No	Single vessel disease	Proximal LAD	G4	3.5	20	19	130	0	No	No	No	No	No	No	No	No	No	No	<2
369	Female	35	<65 years	160	67	26.1719	260	100	130	120	0.9	1	Anterior	No	No	Yes	No	No	No	Yes	No	Femoral	20	30	No	No	Single vessel disease	Proximal LAD	G3	3	48	14.6	130	2	No	No	No	No	No	No	No	No	No	No	≥2
373	Male	35	<65 years	160	80	31.25	150	110	80	130	1.2	1	Anterior	No	No	No	Yes	No	No	No	No	Radial	10	50	No	No	Single vessel disease	Proximal LAD	G5	4.5	15	24.1	120	0	No	No	No	No	No	No	No	No	No	No	<2
374	Male	44	<65 years	170	80	27.6817	500	120	110	149	0.8	1	Inferior - Posterior	No	No	No	Yes	No	No	No	No	Radial	10	45	No	No	Two vessel disease	Left circumflex	G5	4.5	18	10.5	100	0	Yes	No	No	No	No	No	No	No	No	No	<2
376	Male	51	<65 years	170	70	24.2215	110	112	89	126	0.9	1	Anterior	No	No	Yes	No	No	No	No	No	Radial	13	40	No	No	Three vessel disease	Proximal LAD	G5	4	16	11.9	150	1	No	No	No	No	No	No	No	No	No	No	<2
379	Male	36	<65 years	170	70	24.2215	375	140	100	140	0.9	1	Anterior	No	No	No	No	No	No	Yes	No	Radial	20	35	No	No	Two vessel disease	Proximal LAD	G5	3.75	26	15	180	0	No	No	No	No	No	No	No	No	No	No	<2
380	Male	62	<65 years	165	70	25.7117	205	130	64	362	1	1	Inferior	No	No	Yes	No	Yes	No	No	No	Radial	20	45	No	No	Two vessel disease	Right coronary artery	G5	3.75	15	15.1	100	2	No	No	No	No	No	No	No	No	Yes	No	≥2
381	Male	48	<65 years	160	80	31.25	330	125	90	230	0.9	2	Anterior	No	Yes	No	No	Yes	No	Yes	No	Radial	30	40	No	No	Single vessel disease	Proximal LAD	G3	3.5	36	61.9	400	2	No	No	No	No	No	No	No	No	No	No	≥2
382	Male	50	<65 years	170	70	24.2215	480	150	80	118	0.9	1	Anterior	No	No	Yes	Yes	No	No	No	No	Radial	15	40	No	No	Single vessel disease	Proximal LAD	G4	3	38	20	190	1	No	No	No	No	No	No	No	No	No	No	<2
383	Male	56	<65 years	170	80	27.6817	345	110	80	140	1.1	1	Inferior with RV	No	Yes	Yes	No	No	No	No	No	Radial	18	45	No	No	Single vessel disease	Proximal LAD	G1	4	18	7.8	120	1	No	No	No	No	No	No	No	No	No	No	<2
385	Male	55	<65 years	168	70	24.8016	210	117	80	140	1.2	1	Anterior	No	No	Yes	Yes	No	No	Yes	No	Radial	20	30	No	No	Two vessel disease	Proximal LAD	G1	3.5	38	17.6	130	1	No	No	No	No	No	No	No	No	No	No	<2
388	Male	45	<65 years	170	110	38.0623	240	140	110	240	1.2	3	Anterior	Yes	No	Yes	Yes	No	No	Yes	No	Femoral	30	35	No	No	Two vessel disease	Proximal LAD	G5	3.25	16	7.4	80	2	No	No	No	No	No	No	No	No	No	No	≥2
390	Male	65	65 to 75 years	171	75	25.6489	300	142	90	147	0.9	1	Inferior - Posterior	No	No	Yes	No	Yes	No	No	No	Radial	18	45	No	No	Two vessel disease	Left circumflex	G5	4	18	8.3	90	3	No	No	No	No	No	No	No	No	No	No	≥2
392	Female	42	<65 years	166	65	23.5883	270	170	110	298	0.7	2	Anterior	No	No	Yes	No	Yes	No	Yes	No	Radial	12	40	No	No	Single vessel disease	Non-Proximal LAD	G5	4	16	15	120	4	No	Yes	No	No	No	No	No	No	No	No	≥2
395	Female	66	65 to 75 years	#NULL!	#NULL!	#NULL!	360	140	90	303	0.8	1	Inferior	No	No	No	No	Yes	No	No	No	Femoral	15	60	No	No	Two vessel disease	Left circumflex	G5	3	8	18	150	3	No	No	No	No	No	No	No	No	No	No	≥2
398	Male	40	<65 years	170	85	29.4118	345	150	100	295	0.9	1	Inferior - Posterior	No	No	No	No	No	No	No	No	Radial	12	45	No	No	Two vessel disease	Left circumflex	G3	3.25	20	20	100	0	No	No	No	No	No	No	No	No	No	No	<2
399	Male	55	<65 years	170	75	25.9516	210	110	90	270	0.9	1	Anterior	No	No	No	Yes	No	No	Yes	No	Radial	18	35	No	No	Single vessel disease	Proximal LAD	G5	3.5	28	20	210	0	No	No	No	No	No	No	No	No	No	No	<2
401	Male	47	<65 years	175	75	24.4898	225	130	90	137	1	1	Inferior - Posterior	No	No	Yes	Yes	No	No	No	No	Radial	10	55	No	No	Single vessel disease	Left circumflex	G2	3.25	18	12.1	130	1	No	No	No	No	No	No	No	No	No	No	<2
406	Male	44	<65 years	170	140	48.4429	210	140	80	120	0.8	1	Inferior	No	No	No	Yes	No	No	No	No	Radial	12	55	No	No	Single vessel disease	Right coronary artery	G4	3	16	7.5	100	0	No	No	No	No	No	No	No	No	No	No	<2
416	Male	45	<65 years	169	70	24.5089	200	110	60	117	0.8	1	Anterior	No	No	Yes	No	No	No	Yes	No	Femoral	20	30	No	No	Single vessel disease	Proximal LAD	G4	3.25	18	19.9	150	1	No	No	No	No	No	No	No	No	No	No	<2
418	Female	64	<65 years	162	70	26.6728	350	122	82	230	0.7	1	Inferior - Posterior	No	No	Yes	No	No	No	Yes	No	Femoral	20	35	No	No	Three vessel disease	Left circumflex	G4	3	16	6	100	2	No	No	No	No	No	No	No	No	No	No	≥2
425	Male	60	<65 years	170	75	25.9516	470	170	98	167	0.8	1	Inferior with RV	No	No	Yes	No	Yes	No	No	No	Radial	12	50	No	No	Two vessel disease	Right coronary artery	G5	3.5	20	17.6	100	2	No	No	No	No	No	No	No	No	No	No	≥2
426	Male	40	<65 years	168	65	23.03	330	140	70	185	0.8	1	Inferior - Posterior	No	No	Yes	No	Yes	No	No	No	Radial	15	50	No	No	Three vessel disease	Right coronary artery	G5	3.25	31	10	100	2	No	No	No	No	No	No	No	No	No	No	≥2
427	Male	40	<65 years	160	65	25.3906	115	180	100	140	1.1	1	Inferior	No	No	Yes	No	No	No	No	No	Radial	15	45	No	No	Single vessel disease	Right coronary artery	G5	3.25	12	12	120	1	No	No	No	No	No	No	No	No	No	No	<2
428	Male	55	<65 years	170	75	25.9516	180	130	90	130	0.9	1	Lateral	No	No	No	Yes	No	No	No	No	Radial	18	40	No	No	Single vessel disease	Left circumflex	G5	3.5	32	22	210	0	No	No	No	No	No	No	No	No	No	No	<2
434	Male	60	<65 years	162	62	23.6244	615	133	80	126	0.8	1	Anterior	No	No	Yes	Yes	No	No	No	No	Radial	20	40	No	No	Single vessel disease	Proximal LAD	G5	3.75	22	28	200	1	No	No	No	No	No	No	No	No	No	No	<2
439	Male	40	<65 years	170	120	41.5225	460	110	80	110	0.8	1	Inferior with RV	No	No	Yes	No	No	No	Yes	No	Radial	20	35	No	No	Three vessel disease	Right coronary artery	G2	3.5	20	22.1	200	1	No	No	No	No	No	No	No	No	No	No	<2
440	Male	55	<65 years	171	70	23.939	445	179	65	129	1.1	1	Anterior	No	No	Yes	No	No	No	No	No	Radial	12	40	No	No	Two vessel disease	Non-Proximal LAD	G5	3	32	22.8	140	1	No	No	No	No	No	No	No	No	No	No	<2
441	Male	55	<65 years	168	68	24.093	422	140	86	186	1.2	1	Inferior - Posterior	No	No	Yes	No	No	No	No	No	Radial	15	45	No	No	Two vessel disease	Left circumflex	G2	3.5	15	7.4	80	1	No	No	No	No	No	No	No	No	No	No	<2
444	Male	53	<65 years	175	85	27.7551	310	150	85	110	1	1	Inferior	No	No	No	Yes	No	No	No	No	Radial	15	50	No	No	Single vessel disease	Right coronary artery	G2	3.5	12	16.1	105	0	No	No	No	No	No	No	No	No	No	No	<2
447	Male	52	<65 years	165	77	28.2828	440	100	56	230	0.7	1	Inferior with RV	No	Yes	No	No	Yes	No	No	No	Radial	20	60	No	No	Three vessel disease	Right coronary artery	G5	3.5	26	9.2	90	1	No	No	No	No	No	No	No	No	No	No	<2
448	Male	43	<65 years	160	68	26.5625	575	160	120	246	1.1	1	Inferior	No	No	No	Yes	Yes	No	No	No	Radial	18	44	No	No	Three vessel disease	Right coronary artery	G5	4	31	12.3	100	1	No	No	No	No	No	No	No	No	No	No	<2
451	Male	60	<65 years	170	75	25.9516	685	120	100	128	1.3	1	Anterior	No	No	No	Yes	No	No	Yes	No	Radial	25	25	No	No	Three vessel disease	Proximal LAD	G5	3.5	23	14	120	0	No	No	No	No	No	No	No	No	No	No	<2
459	Male	50	<65 years	#NULL!	#NULL!	#NULL!	525	115	90	140	0.8	1	Inferior with RV	No	No	No	Yes	No	No	No	No	Radial	12	40	No	No	Two vessel disease	Right coronary artery	G5	3.25	20	18	120	0	No	Yes	No	No	No	No	Yes	No	No	No	<2
463	Male	66	65 to 75 years	167	80	28.6851	250	120	101	112	1.2	1	Anterior	No	No	Yes	No	No	No	No	No	Radial	20	45	No	No	Single vessel disease	Non-Proximal LAD	G4	3.5	38	10.6	100	2	Yes	No	No	No	No	No	No	No	No	No	≥2
464	Male	45	<65 years	170	80	27.6817	190	120	70	147	0.9	1	Anterior	No	No	Yes	No	No	No	No	No	Radial	10	45	No	No	Two vessel disease	Proximal LAD	G5	3.5	16	10.2	110	1	No	No	No	No	No	No	No	No	No	No	<2
468	Male	38	<65 years	175	75	24.4898	173	143	69	129	0.8	1	Anterior	No	No	No	Yes	No	No	No	No	Radial	12	45	No	No	Two vessel disease	Non-Proximal LAD	G5	3.5	34	5.4	80	0	No	No	No	No	No	No	No	No	No	No	<2
469	Male	40	<65 years	170	65	22.4913	330	140	90	126	1	1	Anterior	No	No	No	Yes	No	No	Yes	No	Radial	18	35	No	No	Single vessel disease	Proximal LAD	G5	3.25	28	10	100	0	No	No	No	No	No	No	No	No	No	No	<2
478	Female	46	<65 years	158	60	24.0346	233	130	80	190	0.6	1	Inferior - Posterior	No	No	Yes	No	No	No	Yes	No	Radial	20	25	No	No	Three vessel disease	Left circumflex	G5	3	28	23	100	2	Yes	No	Yes	No	Yes	Yes	No	No	Yes	Yes	≥2
484	Female	50	<65 years	160	65	25.3906	200	144	70	126	0.6	1	Inferior - Posterior	No	No	No	No	No	No	No	No	Radial	15	55	No	No	Single vessel disease	Left circumflex	G1	3	18	13	110	1	No	No	No	No	No	No	No	No	No	No	<2
485	Male	55	<65 years	170	75	25.9516	250	110	76	130	1	1	Inferior with RV	No	No	No	No	No	No	No	No	Radial	10	55	No	No	Two vessel disease	Right coronary artery	G5	3	22	9.5	100	0	No	No	No	No	No	No	No	No	No	No	<2
486	Female	50	<65 years	165	85	31.2213	220	140	96	140	0.9	1	Lateral	No	No	No	No	No	No	No	No	Radial	15	50	No	No	Single vessel disease	Diagonal	G4	2.75	16	28	200	1	No	No	No	No	No	No	No	No	No	No	<2
487	Male	50	<65 years	180	80	24.6914	510	130	80	150	0.9	1	Anterior	No	No	No	Yes	No	No	No	No	Femoral	12	50	No	No	Two vessel disease	Proximal LAD	G2	3	40	8	100	0	No	No	No	No	No	No	No	No	No	No	<2
490	Male	60	<65 years	170	80	27.6817	500	130	50	140	1.3	1	Anterior	Yes	Yes	Yes	No	Yes	No	Yes	No	Femoral	30	25	No	No	Three vessel disease	Non-Proximal LAD	G5	3	15	11	100	2	Yes	No	Yes	No	No	No	No	No	No	No	≥2
492	Male	57	<65 years	170	70	24.2215	170	90	110	200	0.9	3	Anterior	No	No	Yes	No	No	No	Yes	No	Radial	30	30	No	No	Three vessel disease	Proximal LAD	G5	3.5	30	6.6	100	2	Yes	Yes	Yes	No	No	No	No	No	No	No	≥2
497	Male	60	<65 years	174	65	21.4692	590	130	80	170	0.9	1	Inferior with RV	No	No	Yes	Yes	No	No	No	No	Radial	10	45	No	No	Two vessel disease	Right coronary artery	G5	3	20	15.5	110	1	No	No	Yes	No	No	No	No	No	No	No	<2
498	Male	69	65 to 75 years	#NULL!	#NULL!	#NULL!	285	100	35	140	1	1	Inferior with RV	No	Yes	Yes	No	No	No	No	No	Femoral	10	55	Yes	No	Single vessel disease	Right coronary artery	G5	3.5	23	15	100	2	No	No	No	No	No	No	No	No	No	Yes	≥2
499	Female	60	<65 years	160	80	31.25	485	150	130	174	1	2	Anterior	No	No	No	No	No	No	Yes	No	Femoral	25	50	No	No	Two vessel disease	Non-Proximal LAD	G5	4	32	14	150	2	No	Yes	No	No	No	No	No	No	No	No	≥2
502	Male	47	<65 years	170	68	23.5294	690	100	113	140	1	2	Anterior	Yes	No	Yes	No	No	No	Yes	No	Femoral	35	25	No	Yes	Three vessel disease	Non-Proximal LAD	G5	3.5	32	13	80	2	Yes	No	No	No	No	No	No	No	No	No	≥2
504	Female	48	<65 years	165	66	24.2424	500	140	107	200	0.91	2	Anterior	Yes	No	No	No	No	No	Yes	No	Femoral	30	25	No	No	Single vessel disease	Non-Proximal LAD	G5	4	22	4.8	60	2	Yes	No	Yes	No	No	No	No	No	No	No	≥2
508	Male	42	<65 years	170	75	25.9516	190	150	88	106	1.1	1	Anterior	No	No	No	No	No	No	No	No	Femoral	12	50	No	No	Single vessel disease	Non-Proximal LAD	G3	3.5	22	5.9	90	0	No	No	No	No	No	No	No	No	No	No	<2
509	Male	42	<65 years	170	75	25.9516	190	150	88	106	1.2	1	Anterior	No	No	No	No	No	No	No	No	Femoral	12	50	No	No	Single vessel disease	Non-Proximal LAD	G3	3.5	22	5.9	90	0	No	No	No	No	No	No	No	No	No	No	<2
513	Male	48	<65 years	179	90	28.089	90	200	80	117	1.2	1	Anterior	No	No	No	Yes	No	No	No	No	Radial	12	60	No	No	Two vessel disease	Non-Proximal LAD	G3	3	20	16.9	140	0	No	No	No	No	No	No	No	No	No	No	<2
517	Male	45	<65 years	171	65	22.2291	320	161	90	113	1.1	1	Inferior with RV	No	No	Yes	No	No	No	No	No	Femoral	12	55	No	No	Single vessel disease	Right coronary artery	G5	3.5	32	10.9	100	1	No	No	No	No	No	No	No	No	No	No	<2
519	Male	45	<65 years	171	65	22.2291	320	161	90	113	0.9	1	Inferior with RV	No	No	Yes	No	No	No	No	No	Femoral	12	55	No	No	Single vessel disease	Right coronary artery	G5	3.5	32	10.9	100	1	No	No	No	No	No	No	No	No	No	No	<2
520	Male	72	65 to 75 years	160	68	26.5625	470	100	60	130	1.1	3	Inferior with RV	Yes	No	Yes	No	No	No	Yes	No	Femoral	25	40	No	Yes	Two vessel disease	Left circumflex	G3	3.5	12	12.8	100	3	Yes	No	No	No	No	No	No	No	No	No	≥2
521	Male	48	<65 years	178	80	25.2493	230	140	120	120	1.2	3	Inferior with RV	Yes	No	Yes	Yes	No	No	Yes	No	Femoral	20	30	No	No	Two vessel disease	Right coronary artery	G5	3.5	44	9	100	2	No	No	No	No	No	No	No	No	No	No	≥2
524	Male	55	<65 years	170	90	31.1419	490	140	90	299	1	1	Inferior - Posterior	No	No	Yes	No	Yes	No	No	No	Radial	12	45	No	No	Three vessel disease	Left circumflex	G5	3.25	26	10.9	130	2	No	No	No	No	No	No	No	No	No	No	≥2
526	Male	40	<65 years	167	80	28.6851	240	90	60	132	0.8	1	Inferior - Posterior	No	No	No	Yes	No	No	No	No	Radial	10	50	No	No	Single vessel disease	Left circumflex	G5	3	30	30.9	110	0	No	No	No	No	No	No	No	No	No	No	<2
531	Male	60	<65 years	175	75	24.4898	170	130	60	210	0.8	1	Inferior	No	No	Yes	Yes	Yes	No	No	No	Radial	10	45	No	No	Two vessel disease	Right coronary artery	G2	3	40	18	180	2	No	No	No	No	No	No	No	No	No	No	≥2
538	Male	55	<65 years	#NULL!	#NULL!	#NULL!	345	120	70	140	0.7	1	Anterior	No	No	No	Yes	No	No	Yes	No	Radial	12	35	No	No	Single vessel disease	Proximal LAD	G1	3	17	19.6	100	0	No	No	No	No	No	No	No	No	No	No	<2
545	Male	55	<65 years	172	78	26.3656	95	130	75	136	0.7	1	Anterior	No	No	No	Yes	No	No	No	No	Radial	18	45	No	No	Single vessel disease	Proximal LAD	G3	3.25	16	15	90	0	No	No	No	No	No	No	No	No	No	No	<2
547	Female	50	<65 years	160	70	27.3438	424	150	80	248	0.6	1	Anterior	No	No	Yes	No	Yes	No	Yes	No	Femoral	12	35	No	No	Single vessel disease	Non-Proximal LAD	G5	3	27	23.5	170	3	No	No	No	No	No	No	No	No	No	No	≥2
549	Male	40	<65 years	180	80	24.6914	215	100	90	110	0.9	1	Anterior	No	No	No	No	No	No	No	No	Radial	20	45	No	No	Single vessel disease	Proximal LAD	G5	3.5	20	9.8	130	0	No	No	No	No	No	No	No	No	No	No	<2
550	Male	55	<65 years	172	78	26.3656	95	130	75	136	0.7	1	Anterior	No	No	No	Yes	No	No	No	No	Radial	18	45	No	No	Single vessel disease	Proximal LAD	G3	3.25	16	15	90	0	No	No	No	No	No	No	No	No	No	No	<2
556	Male	42	<65 years	170	71	24.5675	330	130	70	136	1.1	1	Inferior with RV	No	No	No	No	No	No	No	No	Radial	12	55	No	No	Two vessel disease	Right coronary artery	G3	3.25	28	10.8	100	0	No	No	No	No	No	No	No	No	No	No	<2
557	Male	42	<65 years	170	71	24.5675	330	130	70	136	0.9	1	Inferior with RV	No	No	No	No	No	No	No	No	Radial	12	55	No	No	Two vessel disease	Right coronary artery	G3	3.25	28	10.8	100	0	No	No	No	No	No	No	No	No	No	No	<2
564	Male	26	<65 years	160	65	25.3906	300	140	80	124	0.8	1	Anterior	No	No	No	No	No	No	Yes	No	Femoral	20	30	No	No	Single vessel disease	Non-Proximal LAD	G5	3	26	18.1	150	0	No	Yes	No	No	No	No	No	No	No	No	<2
568	Male	50	<65 years	168	70	24.8016	180	110	80	168	0.9	1	Anterior	No	No	No	No	No	No	No	No	Radial	12	40	No	No	Two vessel disease	Non-Proximal LAD	G2	3	26	9	160	0	No	Yes	No	No	No	No	No	No	No	No	<2
573	Male	52	<65 years	172	82	27.7177	540	140	90	141	0.9	1	Inferior - Posterior	No	No	No	No	No	No	No	No	Radial	12	45	No	No	Two vessel disease	Left circumflex	G5	3.5	40	13.8	130	0	No	No	No	No	No	No	No	No	No	No	<2
575	Male	43	<65 years	170	80	27.6817	300	125	88	128	0.9	1	Inferior	No	No	No	No	No	No	No	No	Radial	13	50	No	No	Three vessel disease	Right coronary artery	G1	3	20	15.1	120	0	No	No	No	No	No	No	No	No	No	No	<2
576	Male	40	<65 years	168	40	14.1723	270	180	100	248	1	1	Anterior	No	No	Yes	Yes	No	No	No	No	Radial	12	45	No	No	Three vessel disease	Non-Proximal LAD	G5	4	38	13.6	100	1	Yes	Yes	No	No	No	No	No	No	No	No	<2
584	Male	80	>75 years	170	75	25.9516	330	130	80	140	1.2	1	Anterior	No	No	No	No	No	No	Yes	No	Radial	22	25	No	No	Single vessel disease	Proximal LAD	G5	4	35	19.5	100	2	No	No	No	No	No	No	No	No	No	No	≥2
585	Female	50	<65 years	165	71	26.079	240	130	90	321	1	1	Anterior	No	No	No	No	Yes	No	No	No	Femoral	15	50	No	No	Single vessel disease	Proximal LAD	G5	3	22	8.7	100	2	No	No	No	No	No	No	No	No	No	No	≥2
587	Male	55	<65 years	167	60	21.5139	330	140	200	276	1.5	3	Anterior	Yes	Yes	Yes	No	Yes	No	Yes	No	Femoral	30	30	No	No	Two vessel disease	Proximal LAD	G5	3	12	6.3	80	3	Yes	No	No	No	No	No	No	No	No	No	≥2
589	Female	70	65 to 75 years	158	65	26.0375	210	150	100	130	1	1	Inferior with RV	No	No	Yes	No	No	No	No	No	Radial	10	45	No	No	Single vessel disease	Right coronary artery	G5	3.5	30	7.8	100	3	Yes	No	No	No	No	No	No	No	No	No	≥2
590	Male	50	<65 years	170	70	24.2215	500	100	48	120	0	1	Inferior with RV	No	No	No	Yes	No	No	No	No	Radial	10	45	No	No	Single vessel disease	Right coronary artery	G4	3.5	12	9.5	120	0	No	No	No	No	No	No	No	No	No	No	<2
600	Male	45	<65 years	175	70	22.8571	355	140	120	156	1.1	1	Anterior	No	No	No	No	No	No	Yes	No	Radial	15	35	No	No	Two vessel disease	Non-Proximal LAD	G5	3	40	14.2	120	0	No	No	No	No	No	No	No	No	No	No	<2
601	Male	45	<65 years	175	70	22.8571	355	140	120	156	0.6	1	Anterior	No	No	No	No	No	No	Yes	No	Radial	15	35	No	No	Two vessel disease	Non-Proximal LAD	G5	3	40	14.2	120	0	No	No	No	No	No	No	No	No	No	No	<2
602	Male	45	<65 years	175	70	22.8571	355	140	120	156	0.6	1	Anterior	No	No	No	No	No	No	Yes	No	Radial	15	35	No	No	Two vessel disease	Non-Proximal LAD	G5	3	40	14.2	120	0	No	No	No	No	No	No	No	No	No	No	<2
603	Male	45	<65 years	175	70	22.8571	355	140	120	156	0.4	1	Anterior	No	No	No	No	No	No	Yes	No	Radial	15	35	No	No	Two vessel disease	Non-Proximal LAD	G5	3	40	14.2	120	0	No	No	No	No	No	No	No	No	No	No	<2
604	Male	45	<65 years	175	70	22.8571	355	140	120	156	0.4	1	Anterior	No	No	No	No	No	No	Yes	No	Radial	15	35	No	No	Two vessel disease	Non-Proximal LAD	G5	3	40	14.2	120	0	No	No	No	No	No	No	No	No	No	No	<2
605	Male	45	<65 years	175	70	22.8571	355	140	120	156	0.6	1	Anterior	No	No	No	No	No	No	Yes	No	Radial	15	35	No	No	Two vessel disease	Non-Proximal LAD	G5	3	40	14.2	120	0	No	No	No	No	No	No	No	No	No	No	<2
606	Male	55	<65 years	176	75	24.2123	180	114	100	129	0.6	1	Anterior	No	No	No	Yes	No	No	No	No	Radial	15	40	No	No	Single vessel disease	Proximal LAD	G3	3	30	13.6	100	0	No	No	No	No	No	No	No	No	No	No	<2
607	Female	45	<65 years	165	62	22.7732	420	150	102	121	1.1	1	Anterior	No	No	No	No	No	No	No	No	Radial	15	40	No	No	Single vessel disease	Non-Proximal LAD	G5	3.5	15	13.8	100	1	No	No	No	No	No	No	No	No	No	No	<2
608	Male	55	<65 years	176	75	24.2123	180	114	100	129	1.2	1	Anterior	No	No	No	Yes	No	No	No	No	Radial	15	40	No	No	Single vessel disease	Proximal LAD	G3	3	30	13.6	100	0	No	No	No	No	No	No	No	No	No	No	<2
609	Male	55	<65 years	176	75	24.2123	180	114	100	129	1.2	1	Anterior	No	No	No	Yes	No	No	No	No	Radial	15	40	No	No	Single vessel disease	Proximal LAD	G3	3	30	13.6	100	0	No	No	No	No	No	No	No	No	No	No	<2
610	Male	55	<65 years	176	75	24.2123	180	114	100	129	0.9	1	Anterior	No	No	No	Yes	No	No	No	No	Radial	15	40	No	No	Single vessel disease	Proximal LAD	G3	3	30	13.6	100	0	No	No	No	No	No	No	No	No	No	No	<2
611	Male	44	<65 years	170	70	24.2215	450	110	100	112	1.3	1	Anterior	No	No	No	No	No	No	Yes	No	Radial	20	35	No	No	Two vessel disease	Proximal LAD	G5	4	15	16.2	200	0	Yes	No	No	No	No	No	No	No	No	No	<2
612	Male	44	<65 years	170	70	24.2215	450	110	100	112	1.3	1	Anterior	No	No	No	No	No	No	Yes	No	Radial	20	35	No	No	Two vessel disease	Proximal LAD	G5	4	15	16.2	200	0	Yes	No	No	No	No	No	No	No	No	No	<2
613	Male	44	<65 years	170	70	24.2215	450	110	100	112	1.3	1	Anterior	No	No	No	No	No	No	Yes	No	Radial	20	35	No	No	Two vessel disease	Proximal LAD	G5	4	15	16.2	200	0	Yes	No	No	No	No	No	No	No	No	No	<2
614	Male	42	<65 years	178	75	23.6713	80	140	106	139	1.1	1	Anterior	No	No	No	No	No	No	Yes	No	Radial	20	35	No	No	Single vessel disease	Non-Proximal LAD	G5	3	40	27.2	150	0	No	No	No	No	No	No	No	No	No	No	<2
615	Male	42	<65 years	178	75	23.6713	80	140	106	139	1.1	1	Anterior	No	No	No	No	No	No	Yes	No	Radial	20	35	No	No	Single vessel disease	Non-Proximal LAD	G5	3	40	27.2	150	0	No	No	No	No	No	No	No	No	No	No	<2
616	Male	70	65 to 75 years	162	70	26.6728	400	146	69	86	0.9	1	Inferior - Posterior	No	No	No	No	No	No	No	No	Radial	15	50	No	No	Three vessel disease	Left circumflex	G2	3.5	16	9.9	80	1	No	No	No	No	No	No	No	No	No	No	<2
620	Male	55	<65 years	165	65	23.8751	134	134	81	110	0.7	1	Anterior	No	No	No	No	No	No	No	No	Radial	12	45	No	No	Single vessel disease	Proximal LAD	G5	4	12	7.6	100	0	No	No	No	No	No	No	No	No	No	No	<2
626	Male	47	<65 years	179	75	23.4075	215	177	100	100	0.8	1	Inferior	No	No	No	No	No	No	No	No	Radial	15	45	No	No	Single vessel disease	Left circumflex	G3	3	13	15.6	100	0	No	No	No	No	No	No	No	No	No	No	<2
632	Male	30	<65 years	179	88	27.4648	460	139	65	135	0.8	1	Inferior	No	No	No	No	No	No	No	No	Radial	18	45	No	No	Single vessel disease	Right coronary artery	G5	3.5	26	18	150	0	No	No	No	No	No	No	No	No	No	No	<2
634	Male	57	<65 years	165	65	23.8751	190	174	96	210	0.7	3	Inferior with RV	Yes	No	Yes	No	Yes	No	Yes	No	Radial	30	35	No	No	Two vessel disease	Right coronary artery	G5	2.5	32	42	200	3	Yes	Yes	No	No	No	No	No	No	No	No	≥2
635	Female	32	<65 years	168	75	26.5731	305	123	80	180	0.8	1	Inferior	Yes	No	No	No	No	No	No	No	Radial	25	45	No	No	Single vessel disease	Right coronary artery	G3	3.5	22	20	180	1	No	No	No	No	No	No	No	No	No	No	<2
636	Female	53	<65 years	168	69	24.4473	470	170	116	264	0.8	1	Anterior	Yes	No	Yes	No	Yes	No	Yes	No	Radial	15	35	No	No	Two vessel disease	Non-Proximal LAD	G2	3	22	14	150	3	No	No	No	No	No	No	No	No	No	No	≥2
638	Male	48	<65 years	176	75	24.2123	152	170	80	148	0.7	1	Inferior with RV	Yes	No	Yes	Yes	No	No	No	No	Radial	15	45	No	No	Two vessel disease	Right coronary artery	G5	3.5	13	5.7	80	1	No	No	No	No	No	No	No	No	No	No	<2
644	Male	36	<65 years	#NULL!	#NULL!	#NULL!	200	150	130	140	1.1	1	Anterior	No	No	No	No	No	No	No	No	Radial	10	55	No	No	Single vessel disease	Non-Proximal LAD	G1	2.75	16	11.2	110	0	No	No	No	No	No	No	No	No	No	No	<2
654	Female	43	<65 years	160	65	25.3906	280	130	80	137	0.6	1	Anterior	No	No	No	No	No	No	No	No	Radial	18	40	No	No	Single vessel disease	Proximal LAD	G5	3.75	22	10.8	100	1	No	No	No	No	No	No	No	No	No	No	<2
655	Male	50	<65 years	170	79	27.3356	200	130	88	320	1.1	1	Inferior	No	No	No	No	No	No	No	No	Radial	12	50	No	No	Two vessel disease	Right coronary artery	G5	3.25	16	14	110	0	No	No	No	No	No	No	No	No	No	No	<2
660	Male	50	<65 years	179	80	24.968	80	130	64	117	1	1	Inferior with RV	No	No	Yes	Yes	No	No	No	No	Radial	15	45	No	No	Two vessel disease	Right coronary artery	G3	3	15	10.2	90	1	No	No	No	No	No	No	No	No	No	No	<2
662	Female	36	<65 years	150	70	31.1111	490	110	130	230	1.1	3	Posterior	Yes	No	No	No	Yes	No	Yes	No	Femoral	40	25	No	No	Two vessel disease	Left circumflex	G5	3	18	12.4	100	3	No	Yes	No	No	No	No	No	No	No	No	≥2
664	Male	54	<65 years	168	70	24.8016	280	117	50	286	0.9	1	Inferior with RV	No	No	No	Yes	No	No	No	No	Femoral	15	55	Yes	No	Single vessel disease	Right coronary artery	G2	3.5	57	11.3	120	0	No	No	No	No	No	No	No	No	No	No	<2
666	Male	63	<65 years	185	75	21.9138	250	145	80	112	1.3	1	Inferior with RV	No	No	No	No	Yes	No	No	No	Radial	20	45	No	No	Three vessel disease	Left circumflex	G4	3.25	19	35	200	1	Yes	Yes	No	No	No	No	No	No	No	No	<2
669	Male	65	65 to 75 years	170	85	29.4118	380	140	80	140	1.22	3	Anterior	No	No	Yes	Yes	No	No	Yes	No	Femoral	35	40	No	No	Three vessel disease	Right coronary artery	G5	3.5	15	9	100	3	No	Yes	No	No	No	No	No	No	No	No	≥2
683	Male	45	<65 years	162	#NULL!	#NULL!	226	118	62	99	1	1	Anterior	No	No	Yes	Yes	No	No	Yes	No	Radial	10	35	No	No	Single vessel disease	Non-Proximal LAD	G4	3.75	22	9	80	1	No	No	No	No	No	No	No	No	No	No	<2
684	Male	55	<65 years	158	78	31.245	550	103	83	103	1	1	Inferior	No	No	No	No	No	No	No	No	Radial	18	45	No	No	Single vessel disease	Left circumflex	G5	3	30	14	120	0	No	No	No	No	No	No	No	No	No	No	<2
685	Male	51	<65 years	160	80	31.25	410	110	65	381	1.1	1	Inferior	No	No	Yes	No	No	No	No	No	Radial	12	60	No	No	Two vessel disease	Left circumflex	G2	3.25	12	8.4	90	1	No	No	No	No	No	No	No	No	No	No	<2
689	Female	50	<65 years	158	70	28.0404	680	140	70	324	0.6	2	Anterior	No	No	No	No	Yes	No	Yes	No	Radial	25	45	No	No	Single vessel disease	Non-Proximal LAD	G5	3.25	22	12.8	80	3	No	Yes	No	No	No	No	No	No	No	No	≥2
693	Male	50	<65 years	169	80	28.0102	500	150	80	110	1.1	1	Anterior	No	No	Yes	No	Yes	No	No	No	Radial	18	50	No	No	Two vessel disease	Non-Proximal LAD	G5	3.5	18	6.2	80	2	No	No	No	No	No	No	No	No	No	No	≥2
694	Male	42	<65 years	170	80	27.6817	320	161	110	178	0.9	1	Anterior	No	No	Yes	No	No	No	No	No	Radial	15	40	No	No	Two vessel disease	Proximal LAD	G2	3.5	26	9.6	100	1	No	No	No	No	No	No	No	No	No	No	<2
695	Male	42	<65 years	170	80	27.6817	320	161	110	178	1.1	1	Anterior	No	No	Yes	No	No	No	No	No	Radial	15	40	No	No	Two vessel disease	Proximal LAD	G2	3.5	26	9.6	100	1	No	No	No	No	No	No	No	No	No	No	<2
696	Male	53	<65 years	170	75	25.9516	435	135	70	158	0.5	1	Inferior with RV	No	No	No	Yes	No	No	No	No	Radial	15	50	No	No	Two vessel disease	Right coronary artery	G5	3.5	26	10.4	100	0	No	No	No	No	No	No	No	No	No	No	<2
697	Male	53	<65 years	170	75	25.9516	435	135	70	158	0.4	1	Inferior with RV	No	No	No	Yes	No	No	No	No	Radial	15	50	No	No	Two vessel disease	Right coronary artery	G5	3.5	26	10.4	100	0	No	No	No	No	No	No	No	No	No	No	<2
703	Male	70	65 to 75 years	169	75	26.2596	306	132	98	180	1.1	1	Inferior	No	No	No	No	Yes	No	No	No	Radial	12	45	No	No	Three vessel disease	Right coronary artery	G2	3.75	22	27.9	150	2	No	No	No	No	No	No	No	No	No	No	≥2
704	Male	72	65 to 75 years	165	72	26.4463	150	110	90	180	1	1	Inferior	No	No	Yes	No	Yes	No	Yes	No	Radial	10	30	No	No	Single vessel disease	Right coronary artery	G4	3.5	18	5.4	90	3	No	No	No	No	No	No	No	No	No	No	≥2
708	Female	45	<65 years	165	65	23.8751	510	195	97	205	1	2	Anterior	No	No	Yes	No	Yes	No	Yes	No	Femoral	30	40	No	No	Two vessel disease	Non-Proximal LAD	G3	3	26	12	100	4	No	No	No	No	No	No	No	No	No	No	≥2
709	Male	48	<65 years	160	80	31.25	180	115	76	230	0.7	1	Inferior	No	No	No	No	Yes	No	No	No	Radial	10	60	No	No	Two vessel disease	Right coronary artery	G5	3.25	26	12.2	140	1	No	No	No	No	No	No	No	No	No	No	<2
712	Male	67	65 to 75 years	165	90	33.0579	543	115	90	140	0.9	1	Anterior	No	No	No	No	No	No	No	No	Radial	30	40	No	No	Two vessel disease	Proximal LAD	G3	4	26	15.5	100	1	No	Yes	No	No	No	No	No	No	No	No	<2
714	Female	50	<65 years	160	70	27.3438	260	150	110	155	0.7	1	Anterior	No	No	No	No	Yes	No	No	No	Radial	20	50	No	No	Single vessel disease	Non-Proximal LAD	G5	3.25	12	14.6	180	2	No	No	No	No	No	No	No	No	No	No	≥2
715	Male	55	<65 years	160	70	27.3438	690	128	110	240	1.1	2	Inferior with RV	No	No	No	Yes	No	No	Yes	No	Femoral	10	40	No	No	Two vessel disease	Right coronary artery	G5	3.5	35	18.1	200	1	No	No	No	No	No	No	No	No	No	No	<2
717	Male	50	<65 years	#NULL!	#NULL!	#NULL!	310	110	68	140	0.3	1	Inferior with RV	No	No	No	Yes	No	No	No	No	Radial	12	40	No	No	Two vessel disease	Right coronary artery	G2	3.75	15	17.8	100	0	No	No	No	No	No	No	No	No	No	No	<2
725	Male	35	<65 years	175	80	26.1224	180	100	60	110	0.9	1	Inferior	No	No	No	Yes	No	No	No	No	Radial	15	50	No	No	Two vessel disease	Right coronary artery	G5	4	26	20	110	0	No	No	No	No	No	No	No	No	No	No	<2
730	Female	80	>75 years	160	55	21.4844	660	162	110	230	1.4	2	Anterior	No	No	Yes	No	Yes	No	Yes	No	Femoral	40	30	No	No	Two vessel disease	Proximal LAD	G5	3.25	15	13	120	6	Yes	Yes	Yes	No	No	No	No	No	No	No	≥2
731	Male	42	<65 years	#NULL!	#NULL!	#NULL!	159	187	85	140	1.1	1	Anterior	No	No	Yes	Yes	No	No	No	No	Radial	17	45	No	No	Single vessel disease	Non-Proximal LAD	G1	3.25	12	9.1	80	1	No	No	No	No	No	No	No	No	No	No	<2
737	Male	60	<65 years	160	60	23.4375	405	120	80	230	0.9	1	Anterior	No	No	Yes	No	Yes	No	Yes	No	Radial	20	30	No	No	Two vessel disease	Proximal LAD	G5	3.75	15	14.1	120	2	No	Yes	No	No	No	No	No	No	No	No	≥2
738	Male	55	<65 years	#NULL!	#NULL!	#NULL!	150	106	67	140	1.2	1	Inferior	No	No	Yes	Yes	No	No	Yes	No	Radial	20	35	No	No	Three vessel disease	Non-Proximal LAD	G5	3.75	15	11.8	100	1	No	No	No	No	No	No	No	No	No	No	<2
740	Male	60	<65 years	170	70	24.2215	150	170	120	213	1	2	Anterior	No	No	Yes	Yes	No	Yes	Yes	No	Femoral	30	25	No	No	Single vessel disease	Proximal LAD	G5	3.5	15	14.6	120	4	Yes	Yes	No	No	No	No	No	Yes	No	No	≥2
742	Male	60	<65 years	170	74	25.6055	455	107	70	102	1.4	2	Inferior - Posterior	No	No	No	Yes	No	No	Yes	No	Radial	20	55	No	No	Single vessel disease	Left circumflex	G2	3.25	18	20	180	1	Yes	No	No	No	No	No	No	No	No	No	<2
743	Male	45	<65 years	170	76	26.2976	179	117	82	171	0.9	1	Anterior	No	No	No	Yes	No	No	No	No	Radial	20	55	No	No	Single vessel disease	Proximal LAD	G1	3.5	16	15.8	140	0	No	No	No	No	No	No	No	No	No	No	<2
744	Male	51	<65 years	175	80	26.1224	160	130	100	174	1.1	1	Lateral	No	No	Yes	No	No	No	No	No	Radial	15	50	No	No	Single vessel disease	Ramus	G5	4	23	10.1	100	1	No	No	No	No	No	No	No	No	No	No	<2
752	Male	50	<65 years	174	75	24.7721	660	146	120	118	0.6	2	Anterior	Yes	No	Yes	Yes	No	No	Yes	No	Femoral	14	40	No	No	Three vessel disease	Non-Proximal LAD	G5	3	70	45	220	2	No	No	No	No	No	No	No	No	No	No	≥2
753	Male	36	<65 years	176	80	25.8264	255	120	105	118	0.9	1	Anterior	No	No	No	Yes	No	No	Yes	No	Femoral	18	25	No	No	Single vessel disease	Non-Proximal LAD	G5	3.25	35	25.6	200	0	No	No	No	No	No	No	No	No	No	No	<2
756	Female	65	65 to 75 years	165	65	23.8751	180	120	55	234	1.4	1	Inferior with RV	No	Yes	Yes	No	Yes	No	No	No	Femoral	10	50	Yes	No	Three vessel disease	Right coronary artery	G1	3	22	17	180	4	No	No	No	No	No	No	No	No	No	No	≥2
759	Female	50	<65 years	170	78	26.9896	490	130	90	170	0.6	1	Inferior	No	No	Yes	No	No	No	No	No	Radial	12	45	No	No	Single vessel disease	Right coronary artery	G3	2.75	12	20	180	2	No	No	No	No	No	No	Yes	No	No	No	≥2
764	Male	51	<65 years	176	75	24.2123	400	110	79	109	0.9	1	Inferior with RV	No	No	No	Yes	No	No	No	No	Radial	18	45	No	No	Two vessel disease	Right coronary artery	G5	3.25	38	12.9	100	0	No	No	No	No	No	No	No	No	No	No	<2
767	Male	40	<65 years	170	74	25.6055	240	130	85	95	0.8	1	Anterior	No	No	Yes	No	No	No	No	No	Radial	20	45	No	No	Single vessel disease	Proximal LAD	G5	3.25	18	14	140	1	No	No	No	No	No	No	No	No	Yes	No	<2
768	Female	45	<65 years	168	80	28.3447	460	140	100	221	0.8	3	Anterior	Yes	No	Yes	No	Yes	No	Yes	No	Radial	28	25	No	No	Three vessel disease	Proximal LAD	G2	3	35	17.2	180	4	No	No	No	No	No	No	No	No	No	No	≥2
771	Female	55	<65 years	168	68	24.093	510	113	110	107	0.8	1	Anterior	No	No	Yes	No	No	No	No	No	Radial	10	55	No	No	Two vessel disease	Non-Proximal LAD	G3	3.75	18	10.5	120	2	No	No	No	No	No	No	No	No	No	No	≥2
773	Male	60	<65 years	170	80	27.6817	95	130	70	110	0.8	1	Inferior	No	No	No	No	No	No	No	No	Radial	20	50	No	No	Three vessel disease	Right coronary artery	G4	3.5	30	11	160	0	No	No	No	No	No	No	No	No	No	Yes	<2
774	Male	68	65 to 75 years	170	70	24.2215	440	170	100	60	1.2	3	Anterior	No	No	No	No	No	No	Yes	No	Femoral	30	30	No	No	Two vessel disease	Proximal LAD	G2	3.75	22	13	160	2	No	No	No	No	No	No	No	No	No	No	≥2
776	Female	42	<65 years	165	80	29.3848	397	120	110	265	0.6	1	Anterior	No	No	Yes	No	No	No	No	No	Radial	15	40	No	No	Single vessel disease	Proximal LAD	G5	3.5	18	16	120	2	No	No	No	No	No	No	No	No	No	No	≥2
778	Male	45	<65 years	170	70	24.2215	310	110	60	120	0.8	1	Inferior	Yes	No	No	Yes	No	No	No	No	Radial	15	50	No	No	Single vessel disease	Left circumflex	G3	3	24	6.7	60	0	No	No	No	No	No	No	No	No	No	No	<2
780	Male	40	<65 years	170	80	27.6817	150	100	70	129	1.2	1	Inferior with RV	No	No	No	No	No	No	No	No	Radial	10	45	No	No	Single vessel disease	Right coronary artery	G3	3	30	7.6	80	0	No	No	No	No	No	No	No	No	No	No	<2
795	Male	46	<65 years	168	70	24.8016	318	100	50	140	1	1	Inferior with RV	No	Yes	No	No	No	No	No	No	Radial	12	55	No	No	Single vessel disease	Right coronary artery	G5	4.5	28	8.3	100	0	No	No	No	No	No	No	No	No	No	No	<2
798	Male	61	<65 years	175	70	22.8571	265	150	65	173	1.4	1	Anterior	No	Yes	Yes	No	Yes	No	Yes	No	Radial	14	25	No	No	Single vessel disease	Proximal LAD	G5	3.75	26	23.8	170	2	Yes	No	No	No	No	No	No	No	No	No	≥2
802	Male	61	<65 years	175	70	22.8571	265	150	65	173	1.4	1	Anterior	No	Yes	Yes	No	Yes	No	Yes	No	Radial	14	25	No	No	Single vessel disease	Proximal LAD	G5	3.75	26	23.8	170	2	Yes	No	No	No	No	No	No	No	No	No	≥2
806	Male	53	<65 years	165	70	25.7117	380	135	66	130	0.8	1	Inferior with RV	No	No	No	Yes	No	No	No	No	Radial	15	50	No	No	Two vessel disease	Right coronary artery	G5	3.5	26	10	120	0	No	No	No	No	No	No	No	No	No	No	<2
808	Male	55	<65 years	167	80	28.6851	440	160	105	150	0.8	2	Anterior	No	No	Yes	No	Yes	No	Yes	No	Radial	20	35	No	No	Two vessel disease	Proximal LAD	G5	3.25	50	20.4	160	3	Yes	Yes	No	No	No	No	No	No	No	No	≥2
810	Female	65	65 to 75 years	160	67	26.1719	380	110	80	120	0.6	1	Inferior	No	No	Yes	No	No	No	No	No	Radial	15	45	No	No	Single vessel disease	Left circumflex	G2	3	23	3.7	49	3	No	No	No	No	No	No	No	No	No	No	≥2
811	Male	50	<65 years	170	70	24.2215	410	90	85	130	1	2	Anterior	No	No	No	Yes	Yes	No	Yes	No	Radial	25	25	No	Yes	Single vessel disease	Proximal LAD	G5	3	48	11.6	110	2	Yes	No	No	No	No	No	No	No	No	No	≥2
812	Male	50	<65 years	160	80	31.25	400	134	70	230	0.8	1	Inferior with RV	No	No	Yes	No	Yes	No	Yes	No	Radial	20	35	No	No	Three vessel disease	Right coronary artery	G3	3.25	30	11	100	2	No	No	No	No	No	No	No	No	No	No	≥2
814	Female	55	<65 years	170	80	27.6817	300	120	78	140	1	1	Anterior	No	No	Yes	No	Yes	No	No	No	Radial	15	40	No	No	Two vessel disease	Proximal LAD	G5	3.5	26	9.4	100	3	No	No	No	No	No	No	No	No	No	No	≥2
817	Female	42	<65 years	160	70	27.3438	380	100	70	118	0.9	1	Inferior with RV	No	No	Yes	No	No	No	No	No	Radial	10	50	No	No	Single vessel disease	Right coronary artery	G5	3.75	22	8.3	90	2	No	No	No	No	No	No	No	No	No	No	≥2
820	Male	50	<65 years	160	70	27.3438	460	100	90	140	0.8	1	Anterior	No	No	Yes	No	No	No	Yes	No	Radial	25	35	No	No	Single vessel disease	Proximal LAD	G3	3.75	26	13.6	120	1	No	No	No	No	No	No	No	No	No	No	<2
821	Male	35	<65 years	170	80	27.6817	190	130	70	140	0.6	1	Anterior	No	No	Yes	No	No	No	Yes	No	Radial	20	35	No	No	Single vessel disease	Proximal LAD	G4	3.75	15	17.2	150	1	No	No	No	No	No	No	No	No	No	No	<2
822	Female	60	<65 years	160	70	27.3438	300	120	73	140	0.8	1	Inferior with RV	No	No	Yes	No	No	No	No	No	Radial	10	50	No	No	Single vessel disease	Right coronary artery	G3	3.25	26	14	180	2	No	No	No	No	No	No	No	No	No	No	≥2
823	Male	24	<65 years	170	70	24.2215	220	100	90	200	0.6	1	Anterior	No	No	No	Yes	No	No	No	No	Radial	15	40	No	No	Single vessel disease	Proximal LAD	G4	3.75	30	12.1	100	0	No	No	No	No	No	No	No	No	No	No	<2
826	Female	55	<65 years	169	88	30.8112	280	110	70	314	1	1	Posterior	No	No	Yes	No	Yes	No	No	No	Radial	20	50	No	No	Single vessel disease	Left circumflex	G5	3.75	22	15	200	3	No	Yes	No	No	No	No	No	No	No	No	≥2
830	Male	55	<65 years	170	70	24.2215	360	113	94	163	0.9	1	Anterior	No	No	No	No	No	No	No	No	Femoral	12	40	No	No	Two vessel disease	Proximal LAD	G3	3.5	22	15	150	0	No	Yes	No	No	No	No	Yes	No	No	No	<2
831	Male	50	<65 years	169	90	31.5115	500	130	84	206	1.1	1	Inferior with RV	No	No	Yes	No	No	No	No	No	Radial	10	45	No	No	Three vessel disease	Right coronary artery	G3	3.5	33	22.6	150	1	No	No	No	No	No	No	No	No	No	No	<2
832	Male	50	<65 years	169	90	31.5115	500	130	84	206	1.2	1	Inferior with RV	No	No	Yes	No	No	No	No	No	Radial	10	45	No	No	Three vessel disease	Right coronary artery	G3	3.5	33	22.6	150	1	No	No	No	No	No	No	No	No	No	No	<2
835	Male	45	<65 years	169	70	24.5089	188	100	30	120	1.1	1	Inferior with RV	Yes	Yes	Yes	No	No	No	No	No	Femoral	25	45	Yes	No	Two vessel disease	Right coronary artery	G5	3.75	30	13.2	150	1	No	No	No	No	No	No	No	No	No	No	<2
841	Male	55	<65 years	170	70	24.2215	360	113	94	163	0.9	1	Anterior	No	No	No	No	No	No	No	No	Femoral	10	40	No	No	Two vessel disease	Proximal LAD	G3	3.5	22	15	150	0	Yes	Yes	No	No	No	No	Yes	No	No	No	<2
842	Male	42	<65 years	175	70	22.8571	280	140	130	300	1.2	3	Posterior	Yes	No	No	No	Yes	No	Yes	No	Femoral	30	25	No	No	Three vessel disease	Left circumflex	G5	3.25	22	23.2	120	2	No	No	No	No	No	No	No	No	No	No	≥2
843	Male	45	<65 years	166	76	27.5802	200	148	68	140	0.6	1	Anterior	No	No	No	No	No	No	No	No	Radial	18	40	No	No	Single vessel disease	Proximal LAD	G3	3.75	35	14.7	110	0	No	No	No	No	No	No	No	No	No	No	<2
847	Male	55	<65 years	165	70	25.7117	300	130	80	120	0.6	1	Anterior	No	No	Yes	No	No	No	Yes	No	Radial	20	35	No	No	Single vessel disease	Non-Proximal LAD	G3	3.75	18	12.6	80	1	No	No	No	No	No	No	No	No	No	No	<2
853	Male	45	<65 years	170	70	24.2215	180	130	40	160	0.9	1	Inferior with RV	No	No	No	Yes	No	No	No	No	Radial	20	55	No	No	Two vessel disease	Right coronary artery	G5	3.25	12	9	130	0	No	No	No	No	No	No	No	No	No	No	<2
858	Male	41	<65 years	170	85	29.4118	400	130	90	160	0.8	1	Anterior	No	No	No	Yes	No	No	No	No	Radial	20	40	No	No	Two vessel disease	Proximal LAD	G5	3.75	18	10	120	0	No	No	No	No	No	No	No	No	No	No	<2
870	Male	46	<65 years	165	80	29.3848	408	120	132	169	0.9	2	Anterior	No	No	No	No	Yes	No	Yes	No	Radial	15	40	No	No	Single vessel disease	Non-Proximal LAD	G5	3.5	18	12.5	150	2	No	No	No	No	No	No	No	No	No	No	≥2
888	Male	55	<65 years	170	80	27.6817	440	100	114	120	0.9	1	Inferior	No	No	Yes	No	Yes	No	Yes	No	Radial	18	35	No	No	Three vessel disease	Right coronary artery	G5	3.25	26	20.8	110	2	No	Yes	No	No	No	No	No	No	No	No	≥2
890	Female	55	<65 years	160	70	27.3438	520	130	80	157	0.7	1	Inferior with RV	No	No	Yes	No	No	No	No	No	Femoral	15	45	No	No	Two vessel disease	Right coronary artery	G3	3.75	15	8.9	100	2	No	No	No	No	No	No	No	No	No	No	≥2
891	Female	50	<65 years	165	80	29.3848	200	110	112	120	0.8	2	Anterior	No	No	No	No	No	No	Yes	No	Radial	15	35	No	No	Two vessel disease	Proximal LAD	G5	3.5	18	6.7	110	2	No	Yes	No	No	No	No	No	No	No	No	≥2
892	Male	65	65 to 75 years	167	80	28.6851	330	130	70	140	0.9	1	Inferior with RV	No	No	No	Yes	No	No	No	No	Femoral	20	45	No	No	Two vessel disease	Right coronary artery	G3	3.75	22	12	100	1	No	No	No	No	No	No	No	No	No	No	<2
893	Male	44	<65 years	160	70	27.3438	370	100	80	140	1	1	Anterior	No	No	No	Yes	No	No	No	No	Radial	15	40	No	No	Single vessel disease	Proximal LAD	G5	3.5	22	5.9	80	0	No	No	No	No	No	No	No	No	No	No	<2
895	Female	36	<65 years	160	65	25.3906	240	165	80	138	0.8	1	Anterior	No	No	No	No	No	No	No	No	Radial	18	40	No	No	Two vessel disease	Proximal LAD	G2	4.5	53	21.5	120	1	No	Yes	No	No	No	No	No	No	No	No	<2
897	Female	65	65 to 75 years	165	70	25.7117	430	130	80	135	0.6	1	Anterior	No	No	Yes	No	No	No	No	No	Radial	12	40	No	No	Single vessel disease	Proximal LAD	G1	3.75	22	19.4	160	3	No	No	No	No	No	No	No	No	No	No	≥2
900	Male	69	65 to 75 years	175	80	26.1224	360	128	100	136	0.8	1	Anterior	Yes	No	No	Yes	No	No	Yes	Yes	Radial	20	30	No	Yes	Three vessel disease	Proximal LAD	G5	3.75	21	12.5	100	2	No	Yes	No	No	No	No	No	No	No	Yes	≥2
903	Male	45	<65 years	179	110	34.331	163	190	66	82	0.7	1	Anterior	No	No	Yes	No	No	No	No	No	Radial	18	40	No	No	Three vessel disease	Non-Proximal LAD	G5	3.25	35	14	140	1	No	No	No	No	No	No	No	No	No	No	<2
904	Male	50	<65 years	179	76	23.7196	320	110	80	170	0.5	1	Anterior	No	No	No	Yes	No	No	No	No	Radial	12	45	No	No	Single vessel disease	Proximal LAD	G3	3.5	18	8.6	90	0	No	No	No	No	No	No	No	No	No	No	<2
906	Male	63	<65 years	170	65	22.4913	500	130	90	126	0.9	2	Anterior	No	No	No	No	No	No	Yes	No	Femoral	22	30	No	No	Three vessel disease	Non-Proximal LAD	G2	3.75	30	18.7	120	1	Yes	Yes	No	No	No	Yes	No	No	No	No	<2
907	Male	84	>75 years	160	72	28.125	320	130	110	150	0.9	2	Anterior	No	No	No	No	No	No	Yes	No	Radial	21	40	No	No	Single vessel disease	Proximal LAD	G5	3.75	18	21.1	150	3	No	No	No	No	No	No	No	No	No	No	≥2
908	Male	50	<65 years	165	80	29.3848	100	90	83	118	0.8	1	Anterior	No	No	Yes	No	No	No	No	No	Radial	18	40	No	No	Single vessel disease	Non-Proximal LAD	G5	4	12	6.7	70	1	Yes	No	No	No	No	No	No	No	No	No	<2
909	Male	63	<65 years	170	65	22.4913	500	130	90	126	0.9	2	Anterior	No	No	No	No	No	No	Yes	No	Femoral	20	30	No	No	Three vessel disease	Non-Proximal LAD	G2	3.75	30	18.7	120	1	Yes	Yes	No	No	No	Yes	No	No	No	Yes	<2
911	Female	65	65 to 75 years	165	75	27.5482	270	100	50	350	0.8	1	Inferior with RV	No	Yes	Yes	No	Yes	No	No	No	Femoral	11	55	Yes	No	Two vessel disease	Right coronary artery	G5	3.5	61	27.3	120	4	No	No	No	No	No	No	Yes	No	No	No	≥2
912	Female	70	65 to 75 years	160	65	25.3906	410	120	60	136	1	1	Anterior	No	No	Yes	No	Yes	No	No	No	Radial	18	40	No	No	Two vessel disease	Proximal LAD	G2	3.5	30	29	160	4	No	No	No	No	No	No	No	No	No	No	≥2
913	Male	65	65 to 75 years	160	75	29.2969	430	110	80	136	1	1	Anterior	No	No	No	No	No	No	No	No	Radial	18	40	No	No	Single vessel disease	Proximal LAD	G2	4	30	13.3	120	1	No	No	No	No	No	No	No	No	No	No	<2
914	Male	40	<65 years	170	80	27.6817	310	110	90	140	0.7	1	Inferior	No	No	No	Yes	No	No	No	No	Radial	15	40	No	No	Two vessel disease	Right coronary artery	G5	4	30	14	120	0	No	No	No	No	No	No	No	No	No	No	<2
915	Female	75	65 to 75 years	158	68	27.2392	280	110	80	216	1	1	Anterior	No	No	Yes	No	Yes	No	No	No	Femoral	20	40	No	No	Two vessel disease	Proximal LAD	G2	3.75	35	16.2	140	5	No	No	No	No	No	No	No	No	No	No	≥2
916	Male	65	65 to 75 years	176	76	24.5351	320	120	96	140	0.8	1	Anterior	No	No	Yes	No	No	No	Yes	No	Radial	20	25	No	No	Single vessel disease	Proximal LAD	G5	3.75	35	12.9	100	2	No	No	No	No	No	No	No	No	No	No	≥2
917	Female	45	<65 years	160	60	23.4375	400	165	98	225	0.9	1	Inferior - Posterior	No	No	No	No	No	No	No	No	Femoral	18	45	No	No	Two vessel disease	Left circumflex	G5	3.25	34	14	130	1	No	No	No	No	No	No	No	No	No	No	<2
919	Male	67	65 to 75 years	179	81	25.2801	230	115	90	292	1	1	Inferior with RV	No	No	Yes	Yes	Yes	No	No	No	Radial	15	40	No	No	Two vessel disease	Right coronary artery	G3	3.25	34	8.5	100	3	No	No	No	No	No	No	No	No	No	No	≥2
920	Male	67	65 to 75 years	179	81	25.2801	230	115	90	292	1	1	Inferior with RV	No	No	Yes	Yes	Yes	No	No	No	Radial	15	40	No	No	Two vessel disease	Right coronary artery	G3	3.25	34	8.5	100	3	No	No	No	No	No	No	No	No	No	No	≥2
921	Male	67	65 to 75 years	179	81	25.2801	230	115	90	292	1	1	Inferior with RV	No	No	Yes	Yes	Yes	No	No	No	Radial	15	40	No	No	Two vessel disease	Right coronary artery	G3	3.25	34	8.5	100	3	No	No	No	No	No	No	No	No	No	No	≥2
922	Male	67	65 to 75 years	179	81	25.2801	230	115	90	292	1	1	Inferior with RV	No	No	Yes	Yes	Yes	No	No	No	Radial	15	40	No	No	Two vessel disease	Right coronary artery	G3	3.25	34	8.5	100	3	No	No	No	No	No	No	No	No	No	No	≥2
929	Male	34	<65 years	176	73	23.5666	490	164	80	133	1	1	Inferior - Posterior	No	No	No	Yes	No	No	No	No	Radial	12	50	No	No	Single vessel disease	Right coronary artery	G3	4.5	26	9.9	100	0	No	No	No	No	No	No	No	No	No	No	<2
930	Male	34	<65 years	176	73	23.5666	490	164	80	133	1	1	Inferior - Posterior	No	No	No	Yes	No	No	No	No	Radial	12	50	No	No	Single vessel disease	Right coronary artery	G3	4.5	26	9.9	100	0	No	No	No	No	No	No	No	No	No	No	<2
939	Male	46	<65 years	168	70	24.8016	318	100	50	140	1.1	1	Inferior with RV	No	Yes	No	No	No	No	No	No	Radial	12	55	No	No	Single vessel disease	Right coronary artery	G5	4.5	21	8.3	100	0	No	No	No	No	No	No	No	No	No	No	<2
946	Male	32	<65 years	172	75	25.3515	420	120	94	169	1.2	1	Anterior	No	No	No	Yes	No	No	Yes	No	Radial	18	35	No	No	Single vessel disease	Proximal LAD	G5	3.75	22	9	100	0	No	No	No	No	No	No	No	No	No	No	<2
952	Female	65	65 to 75 years	165	75	27.5482	270	100	50	350	1	1	Inferior with RV	No	Yes	Yes	No	Yes	No	No	No	Femoral	10	55	Yes	No	Two vessel disease	Right coronary artery	G5	3.5	61	27.3	120	4	No	Yes	No	No	No	No	Yes	No	No	No	≥2
955	Male	72	65 to 75 years	174	75	24.7721	360	132	130	151	0.8	1	Anterior	Yes	No	No	Yes	Yes	No	Yes	No	Radial	17	20	No	No	Three vessel disease	Proximal LAD	G5	3.75	30	14	120	2	No	Yes	No	No	No	Yes	No	No	No	No	≥2
957	Male	40	<65 years	176	70	22.5981	240	140	80	123	1.2	1	Anterior	No	No	No	Yes	No	No	No	No	Radial	18	55	No	No	Single vessel disease	Proximal LAD	G3	3.75	25	6.9	120	0	No	No	No	No	No	No	No	No	No	No	<2
963	Male	46	<65 years	178	80	25.2493	160	130	90	124	1.1	1	Inferior with RV	No	No	No	No	No	No	No	No	Radial	10	45	No	No	Three vessel disease	Right coronary artery	G5	3	22	12.5	120	0	No	No	No	No	No	No	No	No	No	No	<2
968	Female	63	<65 years	165	60	22.0386	430	160	90	165	0.8	1	Inferior	Yes	No	Yes	No	No	No	No	No	Radial	10	50	No	No	Two vessel disease	Right coronary artery	G5	3.75	52	18.3	120	2	No	No	No	No	No	No	Yes	No	No	No	≥2
972	Male	55	<65 years	170	70	24.2215	170	184	85	116	1.1	1	Anterior	No	No	Yes	No	No	No	No	No	Radial	20	45	No	No	Two vessel disease	Proximal LAD	G3	3.5	38	13	150	1	No	No	No	No	No	No	No	No	No	No	<2
975	Male	50	<65 years	166	75	27.2173	260	145	80	150	0.9	1	Inferior	No	No	No	Yes	No	No	No	No	Radial	15	45	No	No	Single vessel disease	Right coronary artery	G3	3.75	38	13	150	0	No	No	No	No	No	No	No	No	No	No	<2
977	Male	35	<65 years	170	80	27.6817	380	148	90	150	0.7	1	Anterior	No	No	No	No	No	No	No	No	Radial	12	50	No	No	Single vessel disease	Proximal LAD	G3	3.75	12	9.3	100	0	No	No	No	No	No	No	No	No	No	No	<2
978	Male	40	<65 years	173	80	26.7299	270	130	88	136	0.9	1	Anterior	No	No	No	No	No	No	Yes	No	Radial	20	35	No	No	Single vessel disease	Proximal LAD	G5	3.75	12	11.4	110	0	No	No	No	No	No	No	No	No	No	No	<2
979	Male	55	<65 years	179	81	25.2801	190	184	99	116	0.6	1	Anterior	No	No	Yes	Yes	No	No	Yes	No	Radial	22	35	No	No	Two vessel disease	Non-Proximal LAD	G4	3.5	38	11.1	100	1	No	No	No	No	No	No	No	No	No	No	<2
988	Female	50	<65 years	160	70	27.3438	280	129	100	160	1.1	1	Inferior with RV	No	No	Yes	No	No	No	Yes	No	Radial	20	35	No	No	Two vessel disease	Right coronary artery	G5	3.5	22	18	150	2	No	No	No	No	No	No	No	No	No	No	≥2
994	Male	47	<65 years	170	80	27.6817	260	100	60	200	1	1	Anterior	No	No	No	No	No	No	Yes	No	Radial	16	35	No	No	Two vessel disease	Proximal LAD	G2	3.5	28	8.7	120	0	No	No	No	No	No	No	No	No	No	No	<2
998	Female	40	<65 years	160	50	19.5312	360	100	110	120	1	3	Anterior	Yes	No	No	No	No	No	Yes	No	Femoral	30	30	No	No	Single vessel disease	Proximal LAD	G5	3.5	15	14	120	2	No	Yes	No	No	Yes	No	No	No	No	No	≥2
1003	Male	45	<65 years	160	80	31.25	160	100	130	150	0.6	1	Inferior - Posterior	No	No	Yes	No	Yes	No	No	No	Radial	10	60	No	No	Three vessel disease	Left circumflex	G5	2.5	18	8.2	100	2	No	No	No	No	No	No	No	No	No	No	≥2
1004	Male	57	<65 years	160	80	31.25	300	140	80	140	0.9	1	Inferior - Posterior	No	No	Yes	Yes	No	No	No	No	Femoral	16	45	No	No	Two vessel disease	Left circumflex	G5	3.5	26	9	100	1	Yes	No	No	No	No	No	No	No	No	No	<2
1005	Male	55	<65 years	170	90	31.1419	400	140	80	130	0.9	1	Anterior	No	No	No	Yes	No	No	Yes	No	Radial	20	30	No	No	Three vessel disease	Proximal LAD	G5	3.5	27	5.4	80	0	No	No	No	No	No	No	No	No	No	No	<2
1019	Female	48	<65 years	170	89	30.7958	140	134	75	123	0.9	1	Posterior	No	No	Yes	No	No	No	No	No	Radial	15	45	No	No	Single vessel disease	Left circumflex	G5	3.25	15	9.213	130	2	No	No	No	No	No	No	No	No	No	No	≥2
1020	Female	60	<65 years	165	79	29.0174	370	100	60	143	0.6	1	Inferior - Posterior	No	No	Yes	No	Yes	No	No	No	Radial	20	40	No	No	Two vessel disease	Left circumflex	G4	3	32	11.8	120	3	No	No	No	No	No	No	No	No	No	No	≥2
1021	Male	60	<65 years	170	90	31.1419	190	100	100	230	0.9	2	Anterior	No	No	Yes	No	Yes	No	Yes	No	Radial	20	40	No	No	Two vessel disease	Proximal LAD	G5	3.5	64	14.7	130	3	Yes	Yes	No	No	No	No	No	No	No	No	≥2
1022	Male	55	<65 years	165	75	27.5482	670	165	90	101	0.8	1	Inferior	No	No	No	Yes	No	No	No	No	Radial	15	50	No	No	Two vessel disease	Left circumflex	G4	3.25	22	24.9	130	0	No	No	No	No	No	No	No	No	No	No	<2
1024	Female	98	>75 years	165	60	22.0386	530	110	100	128	0.5	3	Anterior	Yes	No	No	No	No	No	Yes	No	Femoral	30	20	No	No	Three vessel disease	Proximal LAD	G4	3	28	19.6	120	4	No	Yes	No	No	No	Yes	No	No	No	No	≥2
1028	Male	48	<65 years	170	90	31.1419	576	108	60	84	0.8	1	Inferior with RV	No	No	No	Yes	No	No	No	No	Radial	20	45	No	No	Two vessel disease	Right coronary artery	G2	3.75	28	15.5	120	0	No	Yes	No	No	No	No	No	No	No	No	<2
1029	Male	54	<65 years	150	65	28.8889	480	170	71	189	0.8	1	Inferior with RV	No	No	Yes	No	Yes	No	No	No	Radial	12	50	No	No	Single vessel disease	Right coronary artery	G5	3	22	14.8	150	2	No	No	No	No	No	No	No	No	No	No	≥2
1030	Male	72	65 to 75 years	160	58	22.6562	200	110	94	89	1.4	1	Inferior with RV	No	Yes	Yes	No	No	No	Yes	No	Radial	20	35	No	No	Two vessel disease	Right coronary artery	G4	2	30	21	90	2	No	No	No	No	No	No	No	No	No	No	≥2
1032	Male	62	<65 years	175	85	27.7551	180	130	105	94	0.8	1	Posterior	No	No	No	Yes	No	No	No	No	Radial	10	50	No	No	Three vessel disease	Left circumflex	G3	4	27	5.5	70	0	No	No	No	Yes	No	No	No	No	No	No	<2
1037	Female	40	<65 years	163	56	21.0772	330	160	70	140	1	1	Anterior	No	No	Yes	No	No	No	No	No	Radial	15	45	No	No	Single vessel disease	Proximal LAD	G3	3.75	12	9.3	100	2	No	No	No	No	No	No	No	No	No	No	≥2
1039	Male	55	<65 years	160	60	23.4375	270	130	68	108	0.8	1	Anterior	No	No	No	Yes	No	No	Yes	No	Radial	15	30	No	No	Single vessel disease	Non-Proximal LAD	G5	3.25	33	16.5	100	0	No	No	No	No	No	No	No	No	No	No	<2
1041	Female	60	<65 years	162	62	23.6244	210	120	78	121	0.7	1	Inferior with RV	No	No	Yes	No	Yes	No	No	No	Radial	15	40	No	No	Two vessel disease	Proximal LAD	G5	3.5	12	19.4	100	3	No	No	No	No	No	No	No	No	No	No	≥2
1049	Male	40	<65 years	173	70	23.3887	450	156	90	134	0.8	1	Anterior	No	No	No	Yes	No	No	No	No	Radial	11	40	No	No	Single vessel disease	Proximal LAD	G4	3.75	28	10.7	80	0	No	Yes	No	No	No	No	No	No	No	No	<2
1056	Male	48	<65 years	170	85	29.4118	390	80	60	320	0.6	1	Anterior	No	Yes	No	No	Yes	No	Yes	No	Femoral	16	35	Yes	No	Two vessel disease	Proximal LAD	G5	3.75	86	16	120	1	Yes	Yes	No	No	No	No	No	No	No	Yes	<2
1058	Female	65	65 to 75 years	165	55	20.202	400	120	80	125	1.2	1	Inferior with RV	No	No	Yes	No	No	No	No	No	Radial	10	40	No	No	Single vessel disease	Right coronary artery	G5	3.25	28	8	100	3	No	No	No	No	No	No	No	No	No	No	≥2
1060	Male	50	<65 years	175	75	24.4898	220	106	56	139	1	1	Inferior - Posterior	No	No	No	Yes	No	No	No	No	Femoral	20	45	Yes	No	Single vessel disease	Left circumflex	G5	3.5	30	19	120	0	No	No	No	No	No	No	No	No	No	No	<2
1068	Male	64	<65 years	164	70	26.0262	210	140	80	130	0.9	1	Inferior with RV	No	No	Yes	No	No	No	No	No	Radial	15	45	No	No	Three vessel disease	Right coronary artery	G5	2.75	30	8.9	90	1	No	No	No	No	No	No	No	No	No	No	<2
1069	Male	57	<65 years	165	80	29.3848	160	180	90	150	1	2	Anterior	No	No	No	No	Yes	No	Yes	No	Radial	25	30	No	No	Single vessel disease	Proximal LAD	G2	3.75	18	6.7	90	2	Yes	No	No	No	No	No	No	No	No	No	≥2
1073	Male	61	<65 years	170	100	34.6021	240	80	30	268	1.2	1	Inferior with RV	Yes	Yes	Yes	Yes	Yes	No	No	Yes	Femoral	16	40	Yes	No	Three vessel disease	Right coronary artery	G5	4	18	12	100	3	No	No	No	No	No	Yes	No	No	No	No	≥2
1075	Female	55	<65 years	165	65	23.8751	195	146	80	140	0.7	1	Anterior	No	No	No	No	No	No	Yes	No	Radial	10	30	No	No	Single vessel disease	Proximal LAD	G5	3.5	18	6.7	100	1	No	Yes	No	No	No	No	No	No	No	No	<2
1082	Male	80	>75 years	173	70	23.3887	300	103	74	124	1.4	2	Inferior with RV	Yes	No	Yes	No	No	No	Yes	No	Femoral	19	45	No	No	Two vessel disease	Right coronary artery	G5	3	18	10	100	4	No	Yes	No	No	No	No	No	No	No	Yes	≥2
1084	Female	40	<65 years	165	75	27.5482	190	184	100	205	0.8	3	Anterior	Yes	No	Yes	No	No	No	Yes	No	Femoral	30	40	No	No	Single vessel disease	Proximal LAD	G5	3.75	22	10	120	3	No	Yes	No	No	No	No	No	No	No	No	≥2
1087	Female	40	<65 years	165	75	27.5482	190	184	100	205	0.8	3	Anterior	Yes	No	Yes	No	No	No	Yes	No	Femoral	30	40	No	No	Single vessel disease	Proximal LAD	G5	3.75	22	10	120	3	No	Yes	No	No	No	No	No	No	No	No	≥2
1088	Female	40	<65 years	165	75	27.5482	190	184	100	205	0.8	3	Anterior	Yes	No	Yes	No	No	No	Yes	No	Femoral	30	40	No	No	Single vessel disease	Proximal LAD	G5	3.75	22	10	120	3	No	Yes	No	No	No	No	No	No	No	No	≥2
1091	Male	50	<65 years	167	80	28.6851	380	140	40	150	0.9	1	Inferior with RV	No	Yes	No	Yes	No	No	No	No	Femoral	18	50	Yes	No	Single vessel disease	Right coronary artery	G5	3.75	15	7	80	0	No	No	No	No	No	No	No	No	No	No	<2
1092	Male	55	<65 years	170	76	26.2976	630	100	100	120	0.7	2	Anterior	No	No	No	Yes	No	No	Yes	No	Radial	20	30	No	No	Two vessel disease	Proximal LAD	G5	3.75	26	7.5	100	1	Yes	Yes	No	No	No	No	No	No	No	No	<2
1093	Male	70	65 to 75 years	165	70	25.7117	140	150	100	131	1.2	3	Anterior	Yes	No	No	No	No	No	Yes	No	Femoral	20	25	No	No	Three vessel disease	Proximal LAD	G3	3.25	34	7.3	130	2	No	No	No	No	No	No	No	No	No	No	≥2
1094	Male	40	<65 years	165	80	29.3848	220	140	80	100	0.8	1	Lateral	No	No	No	Yes	No	No	No	No	Radial	18	40	No	No	Two vessel disease	Proximal LAD	G5	3.75	15	9	100	0	No	No	No	No	No	No	No	No	No	No	<2
1097	Male	35	<65 years	165	70	25.7117	230	100	65	100	0.7	1	Inferior	No	No	No	Yes	No	No	No	No	Radial	12	45	No	No	Two vessel disease	Right coronary artery	G5	3.75	30	7.2	80	0	No	No	No	No	No	No	No	No	No	No	<2
1098	Male	50	<65 years	164	73	27.1416	180	140	70	140	1	2	Anterior	No	No	No	No	Yes	No	Yes	No	Radial	18	40	No	No	Single vessel disease	Proximal LAD	G5	3.5	26	6.9	80	2	No	No	No	No	No	No	No	No	No	No	≥2
1099	Female	50	<65 years	160	68	26.5625	340	140	60	132	0.6	1	Lateral	No	No	Yes	No	No	No	No	No	Radial	15	50	No	No	Single vessel disease	Diagonal	G5	2	20	22.7	110	2	No	No	No	No	No	No	No	No	No	No	≥2
1100	Female	60	<65 years	157	69	27.993	310	110	120	221	0.8	2	Anterior	No	No	Yes	No	Yes	No	Yes	No	Femoral	25	40	No	No	Two vessel disease	Non-Proximal LAD	G5	3	15	25	140	4	Yes	No	No	No	No	No	No	No	No	No	≥2
1101	Female	70	65 to 75 years	157	66	26.7759	220	150	76	340	0.8	1	Anterior	No	No	Yes	No	Yes	No	No	No	Radial	20	40	No	No	Single vessel disease	Proximal LAD	G5	4	8	8.7	80	4	No	No	No	No	No	No	No	No	No	No	≥2
1104	Female	50	<65 years	165	70	25.7117	210	170	80	214	1	1	Inferior with RV	No	No	Yes	No	Yes	No	No	No	Radial	13	45	No	No	Two vessel disease	Right coronary artery	G3	3	38	30.7	120	3	No	Yes	No	No	No	No	No	No	No	No	≥2
1105	Male	39	<65 years	170	89	30.7958	460	140	100	167	0.9	1	Anterior	No	No	No	Yes	No	No	No	No	Radial	20	40	No	No	Single vessel disease	Non-Proximal LAD	G3	3.25	18	9.1	100	0	No	No	No	No	No	No	No	No	No	No	<2
1106	Male	37	<65 years	170	70	24.2215	410	138	100	150	0.9	1	Anterior	No	No	No	Yes	No	No	Yes	No	Radial	18	35	No	No	Single vessel disease	Proximal LAD	G2	3.5	30	13.6	120	0	No	No	No	No	No	No	No	No	No	No	<2
1113	Male	50	<65 years	176	72	23.2438	360	176	73	230	0.8	2	Anterior	No	No	Yes	No	Yes	No	Yes	No	Radial	18	35	No	No	Two vessel disease	Non-Proximal LAD	G2	3.5	41	20.4	200	3	Yes	No	No	No	No	No	No	No	No	No	≥2
1114	Male	52	<65 years	170	90	31.1419	210	120	80	133	1	1	Anterior	No	No	Yes	Yes	No	No	No	No	Radial	14	40	No	No	Two vessel disease	Non-Proximal LAD	G4	3.5	30	12.3	120	1	No	No	No	No	No	No	No	No	No	No	<2
1115	Male	73	65 to 75 years	174	75	24.7721	400	124	80	160	1	1	Anterior	No	No	No	Yes	No	No	Yes	No	Radial	20	30	No	No	Single vessel disease	Non-Proximal LAD	G2	3	35	20.5	200	1	No	No	No	No	No	No	No	No	No	No	<2
1120	Male	43	<65 years	168	68	24.093	240	165	80	113	0.9	1	Anterior	No	No	No	No	No	No	No	No	Femoral	18	50	No	No	Single vessel disease	Non-Proximal LAD	G3	3.75	30	4.8	100	0	No	No	No	No	No	No	No	No	No	No	<2
1121	Male	43	<65 years	168	68	24.093	240	165	80	113	0.7	1	Anterior	No	No	No	No	No	No	No	No	Femoral	18	50	No	No	Single vessel disease	Non-Proximal LAD	G3	3.75	30	4.8	100	0	No	No	No	No	No	No	No	No	No	No	<2
1129	Female	50	<65 years	150	70	31.1111	710	170	60	160	0.7	1	Inferior with RV	No	No	No	No	No	No	No	No	Femoral	18	45	No	No	Two vessel disease	Right coronary artery	G5	3.25	34	15	130	1	No	No	No	No	No	No	No	No	No	No	<2
1148	Male	45	<65 years	170	88	30.4498	380	120	90	194	0.9	2	Anterior	No	No	Yes	No	No	No	Yes	No	Radial	20	40	No	No	Single vessel disease	Non-Proximal LAD	G3	3.75	15	7.8	100	2	No	No	No	No	No	No	No	No	No	No	≥2
1149	Male	56	<65 years	167	80	28.6851	560	137	75	200	0.7	1	Anterior	No	No	No	Yes	Yes	No	No	No	Radial	15	40	No	No	Single vessel disease	Left circumflex	G3	3.75	18	7.5	80	1	No	No	No	No	No	No	No	No	No	No	<2
1150	Male	58	<65 years	170	84	29.0657	330	150	70	155	0.8	1	Anterior	No	No	No	Yes	Yes	No	No	No	Radial	18	40	No	No	Single vessel disease	Proximal LAD	G3	3.25	38	6.7	100	1	No	No	No	No	No	No	No	No	No	No	<2
1152	Male	45	<65 years	165	70	25.7117	240	120	70	200	0.9	1	Anterior	No	No	No	Yes	No	No	No	No	Radial	20	40	No	No	Two vessel disease	Proximal LAD	G3	3.75	40	11.8	100	0	No	No	No	No	No	No	No	No	No	No	<2
1153	Male	35	<65 years	169	80	28.0102	430	120	80	140	0.9	1	Anterior	No	No	Yes	No	No	No	No	No	Radial	20	45	No	No	Single vessel disease	Non-Proximal LAD	G5	3.75	18	8	80	1	No	No	No	No	No	No	No	No	No	No	<2
1167	Male	50	<65 years	170	90	31.1419	320	130	70	160	1.1	1	Inferior with RV	No	No	Yes	No	No	No	No	No	Radial	20	45	No	No	Two vessel disease	Right coronary artery	G5	4	12	11	130	1	No	No	No	No	No	No	No	No	No	No	<2
1177	Male	45	<65 years	172	74	25.0135	450	120	96	142	0.9	1	Anterior	No	No	No	Yes	No	No	Yes	No	Femoral	22	35	No	No	Two vessel disease	Proximal LAD	G3	3.5	15	14	110	0	No	No	No	No	No	No	No	No	No	No	<2
1179	Female	55	<65 years	165	65	23.8751	380	130	120	250	1.4	3	Anterior	Yes	No	Yes	No	Yes	No	Yes	No	Femoral	10	30	No	No	Three vessel disease	Non-Proximal LAD	G1	3.25	52	18.4	200	4	No	No	No	No	No	Yes	No	No	No	No	≥2
1183	Male	40	<65 years	168	70	24.8016	270	110	120	140	0.9	1	Inferior with RV	No	No	No	Yes	No	No	No	No	Radial	10	60	No	No	Single vessel disease	Right coronary artery	G2	4	26	11.1	100	0	No	No	No	No	No	No	No	No	No	No	<2
1184	Male	40	<65 years	168	70	24.8016	270	110	120	140	0.8	1	Inferior with RV	No	No	No	Yes	No	No	No	No	Radial	10	60	No	No	Single vessel disease	Right coronary artery	G2	4	26	11.1	100	0	No	No	No	No	No	No	No	No	No	No	<2
1191	Male	61	<65 years	165	70	25.7117	400	134	90	300	0.8	1	Anterior	No	No	Yes	No	Yes	No	No	No	Radial	18	45	No	No	Single vessel disease	Proximal LAD	G2	3.5	15	7.9	120	2	No	No	No	No	No	No	No	No	No	No	≥2
1192	Female	65	65 to 75 years	170	80	27.6817	320	110	80	255	0.8	1	Inferior	No	No	Yes	No	Yes	No	No	No	Femoral	20	40	No	No	Three vessel disease	Right coronary artery	G5	3.25	16	34.5	120	4	No	No	No	No	No	No	No	No	No	No	≥2
1193	Female	51	<65 years	158	80	32.0461	700	120	90	160	0.9	1	Anterior	No	No	Yes	No	Yes	No	No	No	Radial	20	45	No	No	Two vessel disease	Right coronary artery	G5	3.5	16	27.3	160	3	No	No	No	No	No	No	No	No	No	No	≥2
1194	Male	65	65 to 75 years	170	80	27.6817	270	110	60	125	0.9	1	Inferior with RV	No	No	No	No	No	No	No	No	Radial	15	45	No	No	Three vessel disease	Right coronary artery	G3	3.5	32	16.7	80	1	No	No	No	No	No	No	No	No	No	No	<2
1197	Female	78	>75 years	160	70	27.3438	220	100	45	150	1.2	1	Inferior	No	Yes	Yes	No	No	Yes	Yes	No	Femoral	15	35	Yes	No	Single vessel disease	Right coronary artery	G5	3.75	38	10.4	80	6	No	No	No	No	No	No	No	No	No	No	≥2
1198	Male	65	65 to 75 years	175	90	29.3878	260	120	80	170	0.7	1	Anterior	No	No	Yes	No	Yes	No	No	No	Radial	20	40	No	No	Three vessel disease	Proximal LAD	G3	4	60	23.5	200	3	No	No	No	No	No	No	No	No	No	No	≥2
1199	Male	64	<65 years	160	80	31.25	220	100	104	140	1	1	Anterior	No	No	Yes	No	Yes	No	No	No	Radial	15	40	No	No	Three vessel disease	Proximal LAD	G5	3.5	44	23	150	2	No	No	No	No	No	No	No	No	No	No	≥2
1203	Male	52	<65 years	#NULL!	#NULL!	#NULL!	600	70	66	120	1.1	3	Inferior	Yes	Yes	No	No	No	No	Yes	No	Femoral	30	40	No	No	Three vessel disease	Left circumflex	G5	3	24	15	110	1	No	No	No	No	No	No	No	No	No	Yes	<2
1204	Female	55	<65 years	165	65	23.8751	380	130	120	250	1.4	3	Anterior	Yes	No	Yes	No	Yes	No	Yes	No	Femoral	10	30	No	No	Three vessel disease	Non-Proximal LAD	G1	3.25	52	18.4	200	4	No	No	No	No	No	Yes	No	No	No	No	≥2
1207	Female	62	<65 years	157	50	20.2848	690	124	120	100	0.7	1	Inferior with RV	No	No	No	No	No	No	No	No	Radial	12	45	No	No	Single vessel disease	Right coronary artery	G5	3.25	22	21	170	1	No	Yes	No	No	No	No	No	No	No	No	<2
1208	Male	50	<65 years	168	80	28.3447	190	124	90	178	1.1	1	Inferior	No	No	Yes	Yes	No	No	No	No	Radial	15	50	No	No	Two vessel disease	Right coronary artery	G3	3.5	19	37	150	1	No	No	No	No	No	No	Yes	No	No	No	<2
1223	Female	50	<65 years	170	100	34.6021	410	139	60	230	0.8	1	Inferior with RV	No	Yes	Yes	No	Yes	No	No	No	Femoral	11	40	No	No	Single vessel disease	Right coronary artery	G5	3.75	41	16	120	3	Yes	Yes	No	No	No	No	No	No	No	No	≥2
1224	Male	55	<65 years	165	80	29.3848	210	140	80	150	0.6	1	Anterior	No	No	No	Yes	No	No	No	No	Radial	15	45	No	No	Two vessel disease	Non-Proximal LAD	G3	3.5	34	9.5	100	0	No	No	No	No	No	No	No	No	No	No	<2
1226	Male	75	65 to 75 years	160	64	25	450	120	77	130	0.9	1	Anterior	No	No	No	Yes	No	No	Yes	No	Femoral	20	30	No	No	Two vessel disease	Proximal LAD	G5	3.5	15	13.4	110	2	Yes	No	No	No	No	No	No	No	No	No	≥2
1232	Male	40	<65 years	170	75	25.9516	440	147	86	140	0.7	1	Anterior	No	No	Yes	No	No	No	Yes	No	Radial	15	35	No	No	Single vessel disease	Non-Proximal LAD	G5	3.75	18	9.6	110	1	No	No	No	No	No	No	No	No	No	No	<2
1233	Male	45	<65 years	170	80	27.6817	250	109	86	115	0.8	1	Anterior	No	No	No	Yes	No	No	Yes	No	Radial	15	35	No	No	Three vessel disease	Proximal LAD	G5	3.75	30	5.3	90	0	No	No	No	No	No	No	No	No	No	No	<2
1240	Male	51	<65 years	172	72	24.3375	250	130	66	118	0.6	1	Inferior - Posterior	No	No	Yes	No	No	No	No	No	Radial	18	45	No	No	Two vessel disease	Left circumflex	G5	3.25	60	17.3	150	1	No	No	No	No	No	No	No	No	No	No	<2
1241	Male	51	<65 years	172	72	24.3375	250	130	66	118	0.6	1	Inferior - Posterior	No	No	Yes	No	No	No	No	No	Radial	18	45	No	No	Two vessel disease	Left circumflex	G5	3.25	60	17.3	150	1	No	No	No	No	No	No	No	No	No	No	<2
1246	Female	50	<65 years	160	68	26.5625	250	100	60	130	0.6	1	Inferior	No	No	Yes	No	No	No	No	No	Radial	12	45	No	No	Three vessel disease	Right coronary artery	G2	3.75	26	7.8	100	2	No	No	No	No	No	No	No	No	No	No	≥2
1247	Female	42	<65 years	158	65	26.0375	340	140	112	150	1	2	Anterior	No	No	Yes	No	Yes	No	Yes	No	Radial	12	45	No	No	Two vessel disease	Non-Proximal LAD	G5	3.25	34	9.8	100	4	No	No	No	No	No	No	No	No	No	No	≥2
1248	Male	60	<65 years	170	80	27.6817	260	130	80	130	1.1	3	Inferior with RV	Yes	No	Yes	No	Yes	No	Yes	No	Femoral	25	30	No	No	Three vessel disease	Left circumflex	G5	3	26	16.8	130	3	No	Yes	No	No	No	No	No	No	No	No	≥2
1253	Male	40	<65 years	160	80	31.25	250	100	110	130	1	2	Inferior with RV	No	No	Yes	No	No	No	Yes	No	Radial	30	25	No	No	Two vessel disease	Non-Proximal LAD	G5	3.5	52	14.5	120	2	No	Yes	No	No	No	No	No	No	No	No	≥2
1256	Female	50	<65 years	170	100	34.6021	410	139	60	230	0.8	1	Inferior with RV	No	Yes	Yes	No	Yes	No	No	No	Femoral	16	40	No	No	Single vessel disease	Right coronary artery	G5	3.75	41	16	120	3	No	Yes	No	No	No	No	No	No	No	No	≥2
1257	Male	50	<65 years	170	70	24.2215	220	140	100	168	0.8	1	Anterior	No	No	No	No	No	No	No	No	Radial	18	40	No	No	Two vessel disease	Proximal LAD	G5	3.25	10	11.5	100	0	No	Yes	No	No	No	No	No	No	No	No	<2
1259	Male	52	<65 years	170	80	27.6817	460	170	86	158	0.6	1	Posterior	No	No	No	Yes	No	No	No	No	Radial	15	45	No	No	Single vessel disease	Left circumflex	G2	3.25	30	12.6	120	0	No	No	No	No	No	No	No	No	No	No	<2
1260	Male	36	<65 years	170	85	29.4118	320	140	80	140	0.5	1	Anterior	No	No	Yes	Yes	No	No	No	No	Radial	20	40	No	No	Three vessel disease	Proximal LAD	G2	3.5	38	22.2	180	1	No	No	No	No	No	No	No	No	No	No	<2
1262	Male	36	<65 years	170	85	29.4118	320	140	80	140	0.5	1	Anterior	No	No	Yes	Yes	No	No	No	No	Radial	20	40	No	No	Three vessel disease	Proximal LAD	G2	3.5	38	22.2	180	1	No	No	No	No	No	No	No	No	No	No	<2
1264	Male	54	<65 years	165	75	27.5482	300	100	60	140	0.8	1	Inferior with RV	No	No	No	Yes	No	No	No	No	Radial	12	40	No	No	Two vessel disease	Right coronary artery	G5	3.75	18	7.8	80	0	No	No	No	No	No	No	No	No	No	No	<2
1265	Male	26	<65 years	165	65	23.8751	385	120	75	140	0.5	1	Anterior	No	No	No	No	No	No	No	No	Radial	18	45	No	No	Single vessel disease	Non-Proximal LAD	G5	3.5	26	5.1	80	0	No	No	No	No	No	No	No	No	No	No	<2
1266	Male	65	65 to 75 years	165	77	28.2828	650	90	100	140	1.2	2	Inferior - Posterior	No	No	Yes	No	No	No	Yes	Yes	Radial	25	30	No	No	Two vessel disease	Left circumflex	G5	3	15	12.6	90	4	Yes	Yes	No	No	No	No	No	No	No	No	≥2
1274	Male	45	<65 years	179	80	24.968	420	160	96	110	0.5	1	Inferior - Posterior	No	No	No	Yes	No	No	No	No	Radial	15	50	No	No	Two vessel disease	Left circumflex	G3	3	26	15.6	150	0	No	No	No	No	No	No	No	No	No	No	<2
1275	Male	38	<65 years	176	81	26.1493	660	204	94	116	0.4	1	Anterior	No	No	Yes	Yes	No	No	Yes	No	Radial	20	35	No	No	Single vessel disease	Non-Proximal LAD	G5	3.5	26	21.1	130	1	No	No	No	No	No	No	No	No	No	No	<2
1276	Male	38	<65 years	176	81	26.1493	660	204	94	116	0.6	1	Anterior	No	No	Yes	Yes	No	No	Yes	No	Radial	20	35	No	No	Single vessel disease	Non-Proximal LAD	G5	3.5	26	21.1	130	1	No	No	No	No	No	No	No	No	No	No	<2
1285	Male	40	<65 years	172	80	27.0416	150	140	90	130	0.9	1	Anterior	No	No	No	No	No	No	No	No	Radial	12	50	No	No	Single vessel disease	Proximal LAD	G3	4	30	5.6	100	0	No	No	No	No	No	No	No	No	No	No	<2
1286	Male	40	<65 years	172	80	27.0416	150	140	90	130	0.9	1	Anterior	No	No	No	No	No	No	No	No	Radial	12	50	No	No	Single vessel disease	Proximal LAD	G3	4	30	5.6	100	0	No	No	No	No	No	No	No	No	No	No	<2
1291	Male	40	<65 years	172	80	27.0416	230	135	45	218	0.9	1	Inferior with RV	No	Yes	No	Yes	No	No	No	No	Femoral	15	50	Yes	No	Three vessel disease	Right coronary artery	G5	3.5	26	8.7	100	0	No	No	No	No	No	No	No	No	No	No	<2
1292	Male	40	<65 years	172	80	27.0416	230	135	45	218	0.8	1	Inferior with RV	No	Yes	No	Yes	No	No	No	No	Femoral	15	50	Yes	No	Three vessel disease	Right coronary artery	G5	3.5	26	8.7	100	0	No	No	No	No	No	No	No	No	No	No	<2
1294	Male	60	<65 years	170	80	27.6817	160	90	50	120	1	1	Inferior with RV	No	No	Yes	No	No	No	No	No	Femoral	14	45	No	No	Three vessel disease	Right coronary artery	G5	3.75	18	11	80	1	No	No	No	No	No	No	No	No	No	No	<2
1300	Male	50	<65 years	170	80	27.6817	440	100	90	140	1	2	Anterior	No	No	Yes	No	Yes	No	Yes	No	Radial	25	30	No	No	Two vessel disease	Proximal LAD	G5	3.5	18	11.4	80	3	No	Yes	No	No	No	No	No	No	No	No	≥2
1306	Male	45	<65 years	179	80	24.968	420	160	96	110	1.1	1	Inferior - Posterior	No	No	No	Yes	No	No	No	No	Radial	15	50	No	No	Two vessel disease	Left circumflex	G3	3	26	15.6	150	0	No	No	No	No	No	No	No	No	No	No	<2
1307	Male	45	<65 years	179	80	24.968	420	160	96	110	1.1	1	Inferior - Posterior	No	No	No	Yes	No	No	No	No	Radial	15	50	No	No	Two vessel disease	Left circumflex	G3	3	26	15.6	150	0	No	No	No	No	No	No	No	No	No	No	<2
1308	Male	45	<65 years	179	80	24.968	420	160	96	110	1.1	1	Inferior - Posterior	No	No	No	Yes	No	No	No	No	Radial	15	50	No	No	Two vessel disease	Left circumflex	G3	3	26	15.6	150	0	No	No	No	No	No	No	No	No	No	No	<2
1336	Male	54	<65 years	#NULL!	#NULL!	#NULL!	180	140	74	214	0.8	1	Anterior	No	No	No	No	Yes	No	Yes	No	Radial	17	25	No	No	Three vessel disease	Proximal LAD	G5	3.25	38	17.2	200	1	Yes	No	No	No	No	No	No	No	No	No	<2
1337	Male	50	<65 years	176	75	24.2123	230	173	86	121	1	2	Anterior	No	No	No	No	No	No	Yes	No	Radial	20	45	No	No	Two vessel disease	Non-Proximal LAD	G5	3.5	18	11.5	100	1	No	No	No	No	No	No	No	No	No	No	<2
1338	Male	70	65 to 75 years	169	68	23.8087	200	158	86	110	1	1	Inferior with RV	No	No	Yes	Yes	No	No	No	No	Radial	12	55	No	No	Single vessel disease	Right coronary artery	G3	2.75	12	15	70	2	No	No	No	No	No	No	No	No	No	No	≥2
1340	Male	40	<65 years	170	100	34.6021	620	120	89	150	0.9	1	Inferior with RV	No	No	No	Yes	No	No	No	No	Radial	15	50	No	No	Single vessel disease	Right coronary artery	G4	3	15	14	100	0	No	No	No	No	No	No	No	No	No	No	<2
1341	Male	52	<65 years	174	73	24.1115	330	123	78	177	0.8	1	Anterior	No	No	No	Yes	No	No	No	No	Radial	35	50	No	No	Single vessel disease	Proximal LAD	G4	3.75	18	13	120	0	No	No	No	No	No	No	No	No	No	No	<2
1342	Male	56	<65 years	#NULL!	#NULL!	#NULL!	180	160	88	140	0.8	1	Inferior with RV	No	No	No	Yes	No	No	No	No	Radial	16	40	No	No	Three vessel disease	Right coronary artery	G5	3.5	30	10.3	80	0	No	No	No	No	No	No	No	No	No	No	<2
1343	Male	55	<65 years	#NULL!	#NULL!	#NULL!	720	100	68	156	0.9	1	Anterior	No	No	No	Yes	No	No	Yes	No	Radial	18	25	No	No	Two vessel disease	Non-Proximal LAD	G4	3	22	6.9	80	0	No	No	No	No	No	No	No	No	No	No	<2
1344	Male	37	<65 years	#NULL!	#NULL!	#NULL!	150	150	86	91	0.8	1	Anterior	No	No	No	Yes	No	No	No	No	Radial	12	45	No	No	Two vessel disease	Non-Proximal LAD	G3	3	18	5.5	140	0	No	No	No	No	No	No	No	No	No	No	<2
1345	Female	56	<65 years	#NULL!	#NULL!	#NULL!	440	140	85	351	1.4	1	Anterior	No	No	No	No	Yes	Yes	No	No	Femoral	14	50	No	No	Three vessel disease	Non-Proximal LAD	G5	3.5	26	16.4	140	4	Yes	Yes	No	No	No	No	No	No	No	No	≥2
1347	Male	40	<65 years	171	69	23.597	300	100	70	179	0.8	1	Anterior	No	No	No	Yes	Yes	No	No	No	Radial	35	40	No	No	Single vessel disease	Proximal LAD	G3	3.75	34	9.2	100	1	No	No	No	No	No	No	No	No	No	No	<2
1349	Male	55	<65 years	175	80	26.1224	350	155	86	130	1	1	Anterior	No	No	No	Yes	Yes	No	Yes	No	Radial	20	35	No	No	Single vessel disease	Non-Proximal LAD	G5	3.5	26	11.2	140	1	No	No	No	No	No	No	No	No	No	No	<2
1354	Male	48	<65 years	#NULL!	#NULL!	#NULL!	230	135	122	302	0.9	1	Anterior	No	No	Yes	No	Yes	No	No	No	Radial	12	40	Yes	No	Two vessel disease	Proximal LAD	G5	3.5	20	11.1	120	2	No	No	No	No	No	No	No	No	No	Yes	≥2
1358	Male	44	<65 years	#NULL!	#NULL!	#NULL!	250	140	78	288	0.8	1	Inferior with RV	No	No	No	Yes	Yes	No	No	No	Radial	10	50	No	No	Three vessel disease	Right coronary artery	G5	3	35	19.4	100	1	No	Yes	No	No	No	No	No	No	No	No	<2
1364	Male	45	<65 years	179	80	24.968	330	121	96	113	1	1	Anterior	No	No	No	No	No	No	Yes	No	Radial	20	35	No	No	Single vessel disease	Proximal LAD	G5	3.25	34	9.2	100	0	No	No	No	No	No	No	No	No	No	No	<2
1368	Female	40	<65 years	#NULL!	#NULL!	#NULL!	360	130	104	350	0.7	1	Anterior	No	No	Yes	No	Yes	Yes	No	No	Radial	11	40	No	No	Single vessel disease	Proximal LAD	G4	3.5	64	12.2	90	5	No	Yes	No	No	No	No	No	No	No	No	≥2
1369	Male	65	65 to 75 years	165	80	29.3848	240	110	70	140	0.9	1	Inferior with RV	No	No	Yes	No	No	No	No	No	Radial	15	45	No	No	Two vessel disease	Right coronary artery	G5	3.75	18	8.9	100	2	Yes	No	No	No	No	No	No	No	No	No	≥2
1370	Male	65	65 to 75 years	165	80	29.3848	240	110	70	140	0.9	1	Inferior with RV	No	No	Yes	No	No	No	No	No	Radial	15	45	No	No	Two vessel disease	Right coronary artery	G5	3.75	18	8.9	100	2	Yes	No	No	No	No	No	No	No	No	No	≥2
1371	Male	63	<65 years	167	80	28.6851	350	100	110	120	0.8	2	Anterior	No	No	Yes	No	No	No	Yes	No	Radial	15	35	No	No	Three vessel disease	Non-Proximal LAD	G5	3.75	60	10.6	100	2	No	No	No	No	No	No	No	No	No	No	≥2
1379	Male	41	<65 years	#NULL!	#NULL!	#NULL!	270	160	108	83	0.8	1	Anterior	No	No	No	No	Yes	No	No	No	Radial	10	40	No	No	Three vessel disease	Non-Proximal LAD	G3	3	40	10.9	100	1	No	Yes	No	No	No	No	No	No	No	No	<2
1380	Male	55	<65 years	#NULL!	#NULL!	#NULL!	280	150	67	136	0.8	1	Anterior	No	No	Yes	No	No	No	Yes	No	Radial	19	35	No	No	Three vessel disease	Proximal LAD	G4	3.5	30	10.6	100	1	No	Yes	No	No	No	No	No	No	No	No	<2
1381	Female	50	<65 years	#NULL!	#NULL!	#NULL!	240	150	90	150	0.7	1	Anterior	No	No	Yes	No	No	No	Yes	No	Femoral	15	35	No	No	Single vessel disease	Proximal LAD	G3	3.25	34	6.5	100	2	No	Yes	No	No	No	No	No	No	No	No	≥2
1382	Female	78	>75 years	#NULL!	#NULL!	#NULL!	320	140	90	170	0.69	2	Anterior	No	No	No	No	No	No	Yes	No	Radial	14	35	No	No	Three vessel disease	Proximal LAD	G2	3.5	38	20.7	100	4	Yes	No	No	No	No	No	No	No	No	No	≥2
1383	Male	48	<65 years	179	81	25.2801	540	110	80	156	1	1	Anterior	No	No	No	Yes	No	No	Yes	No	Radial	20	30	No	No	Single vessel disease	Proximal LAD	G5	3.75	32	15.6	110	0	No	Yes	No	No	No	No	No	No	No	No	<2
1384	Male	60	<65 years	170	75	25.9516	300	132	78	333	0.8	1	Anterior	No	No	No	No	Yes	No	Yes	No	Radial	20	30	No	No	Three vessel disease	Proximal LAD	G3	3.75	18	20	100	1	No	No	No	No	No	No	No	No	No	No	<2
1385	Male	46	<65 years	165	88	32.3232	230	90	66	233	0.9	1	Anterior	No	No	Yes	No	No	No	No	No	Radial	20	50	No	No	Single vessel disease	Proximal LAD	G1	4	27	3.4	80	1	No	No	No	No	No	No	No	No	No	No	<2
1386	Male	50	<65 years	160	75	29.2969	690	140	60	200	0.8	1	Anterior	No	No	No	No	Yes	No	No	No	Radial	15	50	No	No	Two vessel disease	Proximal LAD	G1	3.75	30	16.8	120	1	No	No	No	No	No	No	No	No	No	No	<2
1387	Male	65	65 to 75 years	170	80	27.6817	260	130	108	113	0.9	2	Anterior	No	No	Yes	No	No	No	Yes	No	Radial	18	45	No	No	Two vessel disease	Non-Proximal LAD	G1	3.25	30	15.9	150	3	No	No	No	No	No	No	No	No	No	No	≥2
1388	Male	44	<65 years	172	78	26.3656	270	140	78	288	0.9	1	Inferior with RV	No	No	No	Yes	Yes	No	No	No	Radial	20	45	No	No	Three vessel disease	Right coronary artery	G5	3	35	19.4	100	1	No	No	No	No	No	No	No	No	No	No	<2
1389	Female	60	<65 years	160	67	26.1719	500	140	67	240	0.8	1	Inferior	No	No	No	No	Yes	No	No	No	Radial	15	50	No	No	Two vessel disease	Right coronary artery	G2	3.5	60	11.2	110	2	Yes	No	No	No	No	No	No	No	No	No	≥2
1391	Male	45	<65 years	176	75	24.2123	120	110	80	176	1.2	1	Inferior with RV	No	No	No	Yes	No	No	No	No	Radial	20	40	No	No	Two vessel disease	Right coronary artery	G3	3.25	34	13.5	110	0	No	No	No	No	No	No	No	No	No	No	<2
1393	Male	55	<65 years	#NULL!	#NULL!	#NULL!	180	130	86	258	0.8	1	Anterior	No	No	No	Yes	Yes	No	No	No	Radial	12	40	No	No	Three vessel disease	Proximal LAD	G2	3.5	18	18.2	100	1	No	No	No	No	No	No	No	No	No	No	<2
1394	Male	54	<65 years	167	75	26.8923	160	185	90	179	0.9	1	Anterior	No	No	Yes	Yes	No	No	Yes	No	Radial	20	35	No	No	Single vessel disease	Proximal LAD	G3	3.25	30	6	80	1	No	No	No	No	No	No	No	No	No	No	<2
1396	Male	40	<65 years	169	78	27.31	310	120	82	118	0.9	1	Anterior	No	No	No	Yes	No	No	No	No	Radial	15	45	No	No	Single vessel disease	Proximal LAD	G5	3.25	30	9.2	140	0	No	No	No	No	No	No	No	No	No	No	<2
1397	Female	47	<65 years	160	80	31.25	410	120	80	280	0.7	1	Inferior with RV	No	No	Yes	No	Yes	No	No	No	Radial	18	40	No	No	Single vessel disease	Right coronary artery	G5	3.75	18	12.9	120	3	No	No	No	No	Yes	No	No	No	No	No	≥2
1398	Male	41	<65 years	165	85	31.2213	520	128	90	103	0.7	1	Anterior	No	No	No	Yes	No	No	Yes	No	Radial	18	25	No	No	Single vessel disease	Non-Proximal LAD	G3	3.75	18	6.2	90	0	No	No	No	No	No	No	No	No	No	No	<2
1402	Male	27	<65 years	165	70	25.7117	450	110	80	154	0.7	1	Anterior	No	No	No	No	No	No	Yes	No	Radial	20	25	No	No	Single vessel disease	Non-Proximal LAD	G5	3.25	53	30	200	0	No	No	No	No	No	No	No	No	No	No	<2
1423	Male	55	<65 years	170	70	24.2215	210	147	90	117	1.1	1	Inferior	No	No	Yes	No	No	No	No	No	Radial	18	40	No	No	Two vessel disease	Right coronary artery	G3	3.75	38	10.3	100	1	No	No	No	No	No	No	No	No	No	No	<2
1424	Male	35	<65 years	180	85	26.2346	180	146	60	140	0.9	1	Anterior	No	No	Yes	No	No	No	No	No	Femoral	15	40	No	No	Single vessel disease	Non-Proximal LAD	G5	3.5	30	9.4	100	1	No	No	No	No	No	No	No	No	No	No	<2
1428	Male	45	<65 years	165	70	25.7117	210	150	110	230	1	2	Posterior	No	No	No	Yes	Yes	No	Yes	No	Radial	25	45	No	No	Two vessel disease	Left circumflex	G5	3.5	34	9.6	50	2	No	No	No	No	No	No	No	No	No	No	≥2
1431	Male	60	<65 years	165	80	29.3848	210	180	70	160	0.9	1	Inferior with RV	No	No	Yes	No	No	No	No	No	Femoral	25	45	No	No	Two vessel disease	Right coronary artery	G5	3.5	34	3.2	40	1	No	No	No	No	No	No	No	No	No	No	<2
1432	Male	32	<65 years	172	70	23.6614	180	120	100	118	0.9	1	Anterior	No	No	No	No	No	No	No	No	Radial	15	40	No	No	Single vessel disease	Proximal LAD	G3	3.75	32	14.5	120	0	No	No	No	No	No	No	No	No	No	No	<2
1433	Female	65	65 to 75 years	173	74	24.7252	120	130	80	126	1.1	1	Inferior with RV	No	No	No	Yes	No	No	No	No	Radial	20	55	No	No	Three vessel disease	Right coronary artery	G5	3.5	18	8	110	2	No	No	No	No	No	No	No	No	No	No	≥2
1436	Male	55	<65 years	170	70	24.2215	420	140	70	108	0.9	1	Anterior	No	No	No	Yes	No	No	Yes	No	Radial	20	35	No	No	Three vessel disease	Proximal LAD	G5	3.75	34	12.7	120	0	No	No	No	No	No	No	No	No	No	No	<2
1438	Male	55	<65 years	170	70	24.2215	420	140	70	108	1.1	1	Anterior	No	No	No	Yes	No	No	Yes	No	Radial	20	35	No	No	Three vessel disease	Proximal LAD	G5	3.75	34	12.7	120	0	No	No	No	No	No	No	No	No	No	No	<2
1446	Male	40	<65 years	168	60	21.2585	120	120	60	150	1.1	1	Anterior	No	No	No	Yes	No	No	Yes	No	Radial	15	35	No	No	Single vessel disease	Non-Proximal LAD	G4	3.75	22	15	110	0	No	No	No	No	No	No	No	No	No	No	<2
1449	Male	44	<65 years	178	98	30.9304	250	120	80	148	0.9	1	Anterior	No	No	Yes	No	No	No	Yes	No	Radial	22	35	No	No	Single vessel disease	Proximal LAD	G4	3.75	34	9.4	120	1	No	No	No	No	No	No	No	No	No	No	<2
1450	Male	45	<65 years	165	70	25.7117	270	120	80	99	0.7	1	Inferior	No	No	No	Yes	No	No	No	No	Radial	12	45	No	No	Single vessel disease	Left circumflex	G3	3	12	7.6	70	0	No	Yes	No	No	No	No	No	No	No	Yes	<2
1457	Male	45	<65 years	162	67	25.5296	240	180	150	342	0.9	2	Anterior	No	No	Yes	No	Yes	No	Yes	No	Femoral	30	30	No	No	Single vessel disease	Proximal LAD	G2	2.75	34	9.9	100	3	No	Yes	No	No	No	No	No	No	No	No	≥2
1458	Male	40	<65 years	168	60	21.2585	120	120	60	150	0.9	1	Anterior	No	No	No	Yes	No	No	Yes	No	Radial	15	35	No	No	Single vessel disease	Non-Proximal LAD	G4	3.75	22	15	110	0	No	No	No	No	No	No	No	No	No	No	<2
1459	Male	40	<65 years	168	60	21.2585	120	120	60	150	0.9	1	Anterior	No	No	No	Yes	No	No	Yes	No	Radial	15	35	No	No	Single vessel disease	Non-Proximal LAD	G4	3.75	22	15	110	0	No	No	No	No	No	No	No	No	No	No	<2
1461	Male	55	<65 years	167	70	25.0995	120	110	82	112	0.7	1	Inferior with RV	No	No	No	Yes	No	No	No	No	Radial	12	50	No	No	Three vessel disease	Right coronary artery	G1	3.75	18	21.5	100	0	No	No	No	No	No	No	No	No	No	No	<2
1463	Male	33	<65 years	167	78	27.968	500	140	68	120	0.9	1	Anterior	No	No	No	Yes	No	No	Yes	No	Radial	20	35	No	No	Single vessel disease	Proximal LAD	G5	3.75	26	9.6	100	0	No	No	No	No	No	No	No	No	No	No	<2
1465	Male	70	65 to 75 years	170	65	22.4913	310	130	88	186	0.89	1	Inferior with RV	No	No	No	No	Yes	No	No	No	Radial	15	45	No	No	Two vessel disease	Right coronary artery	G3	3.5	34	12.4	120	2	No	No	No	No	No	No	No	No	No	No	≥2
1468	Male	40	<65 years	171	95	32.4886	120	170	95	140	0.93	1	Lateral	No	No	Yes	Yes	No	No	No	No	Radial	15	60	No	No	Three vessel disease	Diagonal	G3	2	15	19.9	150	1	No	No	No	No	No	No	No	No	No	No	<2
1469	Male	40	<65 years	168	60	21.2585	120	120	60	150	0.7	1	Anterior	No	No	No	Yes	No	No	Yes	No	Radial	15	35	No	No	Single vessel disease	Non-Proximal LAD	G4	3.75	22	15	110	0	No	No	No	No	No	No	No	No	No	No	<2
1496	Male	42	<65 years	168	70	24.8016	230	100	60	94	0.7	1	Inferior - Posterior	No	No	Yes	No	No	No	No	No	Radial	12	50	No	No	Two vessel disease	Right coronary artery	G5	3.25	30	10.6	90	1	No	No	No	No	No	No	No	No	No	No	<2
1498	Male	42	<65 years	168	72	25.5102	553	119	90	134	0.5	1	Anterior	No	No	No	Yes	No	No	Yes	No	Radial	20	35	No	No	Single vessel disease	Proximal LAD	G4	3.5	38	12	130	0	No	No	No	No	No	No	No	No	No	No	<2
1505	Male	27	<65 years	170	80	27.6817	170	107	60	113	0.8	1	Anterior	No	No	No	No	No	No	No	No	Radial	20	40	No	No	Single vessel disease	Proximal LAD	G5	3.75	22	18	140	0	No	No	No	No	No	No	No	No	No	No	<2
1506	Male	54	<65 years	166	70	25.4028	260	180	100	255	0.8	1	Anterior	No	No	Yes	Yes	Yes	No	No	No	Radial	15	45	No	No	Single vessel disease	Non-Proximal LAD	G5	3	15	14.6	130	2	No	No	No	No	No	No	No	No	No	No	≥2
1507	Female	50	<65 years	163	69	25.9701	380	110	104	97	0.9	2	Anterior	No	No	No	No	No	No	Yes	No	Femoral	20	25	No	No	Two vessel disease	Proximal LAD	G5	3.25	30	32.2	110	2	No	No	No	No	No	No	No	No	No	No	≥2
1508	Male	65	65 to 75 years	170	70	24.2215	285	100	53	165	0.8	1	Inferior	No	No	No	Yes	No	No	Yes	No	Radial	16	35	Yes	No	Two vessel disease	Right coronary artery	G5	3.5	34	34.5	150	1	No	No	Yes	No	No	No	No	No	No	No	<2
1509	Male	55	<65 years	163	68	25.5937	260	160	80	267	0.9	1	Inferior - Posterior	No	No	Yes	No	No	No	No	No	Radial	15	45	No	No	Three vessel disease	Right coronary artery	G5	3	22	12.5	70	1	No	No	No	No	No	No	No	No	No	No	<2
1511	Male	53	<65 years	165	82	30.1194	190	110	80	230	0.9	1	Inferior with RV	No	No	No	No	Yes	No	No	No	Radial	15	45	No	No	Two vessel disease	Right coronary artery	G5	3	52	29	150	1	No	No	No	No	No	No	No	No	No	No	<2
1512	Female	50	<65 years	160	73	28.5156	340	120	86	150	0.9	1	Lateral	No	No	Yes	No	No	No	No	No	Radial	15	45	No	No	Single vessel disease	Non-Proximal LAD	G5	3.25	26	26	130	2	No	No	No	No	No	No	No	No	No	No	≥2
1513	Male	40	<65 years	180	76	23.4568	700	130	70	182	0.9	1	Anterior	No	No	No	No	No	No	Yes	No	Radial	20	35	No	No	Two vessel disease	Non-Proximal LAD	G5	3.5	26	19.5	150	0	No	No	No	No	No	No	No	No	No	No	<2
1514	Male	62	<65 years	166	68	24.677	300	130	90	121	0.8	1	Inferior	No	No	No	No	No	No	No	No	Radial	15	45	No	No	Two vessel disease	Right coronary artery	G5	3.5	15	22.6	130	0	No	No	No	No	No	No	No	No	No	No	<2
1517	Male	36	<65 years	165	80	29.3848	430	130	78	157	0.9	1	Anterior	No	No	No	No	No	No	Yes	No	Femoral	20	30	No	No	Single vessel disease	Proximal LAD	G5	3.5	26	11.9	120	0	No	No	No	No	No	No	No	No	No	No	<2
1518	Male	64	<65 years	168	87	30.8248	290	120	80	123	1	1	Inferior	No	No	Yes	No	No	No	No	No	Radial	12	40	No	No	Two vessel disease	Right coronary artery	G5	3.5	38	9.2	80	1	No	No	No	No	No	No	No	No	No	No	<2
1519	Female	40	<65 years	167	80	28.6851	690	130	60	134	0.9	2	Inferior	No	No	Yes	No	No	No	Yes	No	Femoral	12	50	No	No	Two vessel disease	Right coronary artery	G5	3.5	18	18.1	100	3	No	No	No	No	No	No	No	No	No	No	≥2
1521	Male	57	<65 years	160	73	28.5156	690	160	88	140	0.7	1	Anterior	No	No	Yes	No	No	No	Yes	No	Femoral	18	35	No	No	Single vessel disease	Proximal LAD	G5	3.75	18	12.6	100	1	No	No	No	No	No	No	No	No	No	No	<2
1522	Male	33	<65 years	170	80	27.6817	360	120	78	109	0.8	1	Anterior	No	No	No	Yes	No	No	Yes	No	Radial	18	35	No	No	Single vessel disease	Proximal LAD	G5	3.75	18	15.2	100	0	No	No	No	No	No	No	No	No	No	No	<2
1523	Female	54	<65 years	158	70	28.0404	130	160	70	190	0.9	1	Anterior	No	No	Yes	No	No	No	No	No	Radial	18	40	No	No	Single vessel disease	Proximal LAD	G5	3.75	38	15.6	140	2	No	No	No	No	No	No	No	No	No	No	≥2
1531	Male	40	<65 years	170	90	31.1419	480	110	112	129	0.9	2	Anterior	No	No	Yes	No	No	No	Yes	No	Radial	19	35	No	No	Three vessel disease	Proximal LAD	G5	3.5	38	36.2	280	2	No	Yes	No	No	No	No	No	No	No	No	≥2
1532	Male	70	65 to 75 years	160	77	30.0781	230	177	99	197	1	2	Anterior	No	No	Yes	Yes	Yes	No	Yes	No	Femoral	16	45	No	No	Single vessel disease	Non-Proximal LAD	G5	3.75	20	13.5	150	4	No	No	No	No	No	No	No	No	No	No	≥2
1533	Female	75	65 to 75 years	160	70	27.3438	380	130	80	132	0.8	1	Anterior	No	No	No	No	No	No	No	No	Radial	12	45	No	No	Single vessel disease	Non-Proximal LAD	G5	3.5	30	7.6	120	3	No	No	No	No	No	No	No	No	No	No	≥2
1535	Male	55	<65 years	165	80	29.3848	300	120	130	140	1.45	3	Anterior	Yes	Yes	Yes	No	No	No	Yes	No	Femoral	20	30	No	No	Two vessel disease	Non-Proximal LAD	G5	3.75	38	17.3	100	2	No	No	No	No	No	No	No	No	No	No	≥2
1537	Male	50	<65 years	168	70	24.8016	240	148	80	154	0.4	1	Anterior	No	No	Yes	No	No	No	No	No	Radial	15	45	No	No	Two vessel disease	Non-Proximal LAD	G5	3.25	22	6.8	110	1	No	No	No	No	No	No	No	No	No	No	<2
1538	Male	40	<65 years	170	75	25.9516	320	140	50	140	0.4	1	Anterior	No	No	No	No	No	No	No	No	Radial	18	40	No	No	Two vessel disease	Proximal LAD	G4	3.75	26	22.1	140	0	No	No	No	No	No	No	No	No	No	No	<2
1539	Male	40	<65 years	170	75	25.9516	320	140	50	140	0.3	1	Anterior	No	No	No	No	No	No	No	No	Radial	18	40	No	No	Two vessel disease	Proximal LAD	G4	3.75	26	22.1	140	0	No	No	No	No	No	No	No	No	No	No	<2
1540	Male	33	<65 years	168	75	26.5731	480	108	80	86	0.9	1	Anterior	No	No	No	Yes	No	No	No	No	Radial	10	40	No	No	Single vessel disease	Proximal LAD	G2	3.75	34	13.1	120	0	No	No	No	No	No	No	No	No	No	No	<2
1541	Male	33	<65 years	168	75	26.5731	480	108	80	86	1.1	1	Anterior	No	No	No	Yes	No	No	No	No	Radial	10	40	No	No	Single vessel disease	Proximal LAD	G2	3.75	34	13.1	120	0	No	No	No	No	No	No	No	No	No	No	<2
1546	Male	45	<65 years	168	76	26.9274	240	90	80	132	0.7	1	Inferior	No	No	Yes	No	No	No	No	No	Radial	12	50	No	No	Single vessel disease	Right coronary artery	G5	3.25	18	20	20.5	1	No	No	No	No	No	No	No	No	No	No	<2
1548	Male	49	<65 years	170	70	24.2215	410	150	80	107	0.9	1	Inferior with RV	No	No	Yes	No	No	No	Yes	No	Radial	20	35	No	No	Single vessel disease	Right coronary artery	G5	3.5	64	16.8	150	1	No	No	No	No	No	No	No	No	No	No	<2
1549	Female	54	<65 years	160	75	29.2969	260	130	90	169	1	1	Anterior	No	No	No	No	Yes	No	Yes	No	Radial	20	30	No	No	Single vessel disease	Proximal LAD	G3	3.75	22	9.3	90	2	No	No	No	No	No	No	No	No	No	No	≥2
1550	Male	37	<65 years	167	65	23.3067	215	140	70	130	1.1	1	Anterior	No	No	No	No	No	No	No	No	Radial	12	40	No	No	Single vessel disease	Proximal LAD	G2	3.75	22	7.2	80	0	No	No	No	No	No	No	No	No	No	No	<2
1556	Male	60	<65 years	168	80	28.3447	240	110	80	153	0.7	1	Anterior	No	No	No	No	No	No	Yes	No	Radial	20	30	No	No	Two vessel disease	Non-Proximal LAD	G5	3.75	22	9	100	0	No	No	No	No	No	No	No	No	No	No	<2
1559	Male	54	<65 years	160	80	31.25	330	130	80	122	0.8	1	Inferior	No	Yes	No	No	No	No	No	No	Radial	18	45	No	No	Single vessel disease	Left circumflex	G5	3.75	26	9.6	100	0	No	No	No	No	No	No	No	No	No	No	<2
1560	Male	40	<65 years	160	76	29.6875	310	110	80	150	1	1	Inferior with RV	No	No	No	No	No	No	No	No	Radial	15	45	No	No	Single vessel disease	Right coronary artery	G5	3.75	22	7.4	70	0	No	No	No	No	No	No	No	No	No	No	<2
1563	Male	38	<65 years	160	82	32.0312	300	166	86	159	1	1	Anterior	No	No	No	Yes	No	No	Yes	No	Radial	20	30	No	No	Single vessel disease	Proximal LAD	G4	3.5	15	8.7	90	0	No	No	No	No	No	No	No	No	No	No	<2
1565	Male	60	<65 years	170	90	31.1419	400	170	70	190	1.2	1	Posterior	No	No	Yes	Yes	No	No	No	No	Radial	14	45	No	No	Single vessel disease	Left circumflex	G2	3.75	24	16	110	1	No	No	No	No	No	No	No	No	No	No	<2
1566	Male	52	<65 years	155	65	27.0552	60	150	75	109	0.8	1	Inferior	No	No	No	Yes	No	No	No	No	Radial	20	40	No	No	Single vessel disease	Non-Proximal LAD	G4	3.25	26	8.9	70	0	No	No	No	No	No	No	No	No	No	No	<2
1567	Male	59	<65 years	168	70	24.8016	210	130	88	140	0.9	1	Inferior with RV	No	No	No	No	No	No	No	No	Radial	15	50	No	No	Three vessel disease	Right coronary artery	G5	3.75	45	16.4	150	0	No	No	No	No	No	No	No	No	No	No	<2
1568	Male	75	65 to 75 years	167	75	26.8923	290	100	78	130	0.9	1	Inferior	No	No	Yes	No	No	No	No	No	Radial	14	50	No	No	Three vessel disease	Left circumflex	G5	3.5	30	11.8	120	3	No	No	No	No	No	No	No	No	No	No	≥2
1569	Male	55	<65 years	160	72	28.125	210	128	80	129	0.88	1	Anterior	No	No	No	No	No	No	No	No	Radial	12	45	No	No	Single vessel disease	Proximal LAD	G3	3.75	22	18.9	130	0	No	No	No	No	No	No	No	No	No	No	<2
1570	Female	50	<65 years	156	80	32.8731	440	120	80	140	0.5	1	Inferior	No	No	Yes	No	No	No	No	No	Radial	12	50	No	No	Single vessel disease	Right coronary artery	G5	3.25	18	8.2	90	2	No	No	No	No	No	No	No	No	No	No	≥2
1571	Male	50	<65 years	160	70	27.3438	300	90	60	288	0.8	1	Anterior	No	No	Yes	No	Yes	No	Yes	No	Femoral	18	35	No	No	Single vessel disease	Non-Proximal LAD	G4	3.25	18	11.7	120	2	No	No	No	No	No	No	No	No	No	No	≥2
1572	Female	65	65 to 75 years	165	72	26.4463	500	141	86	272	0.9	1	Anterior	No	No	Yes	No	Yes	No	No	No	Femoral	15	50	No	No	Two vessel disease	Right coronary artery	G5	3.75	30	5.9	90	4	No	No	No	No	No	No	No	No	No	No	≥2
1573	Male	42	<65 years	172	78	26.3656	420	140	80	116	0.6	1	Anterior	No	No	No	Yes	No	No	No	No	Radial	15	45	No	No	Two vessel disease	Non-Proximal LAD	G3	3.75	22	7.2	120	0	No	No	No	No	No	No	No	No	No	No	<2
1584	Male	55	<65 years	180	89	27.4691	360	170	90	136	0.9	1	Lateral	No	No	Yes	No	No	No	No	No	Radial	15	50	No	No	Single vessel disease	Diagonal	G5	2	10	13.5	120	1	No	No	No	No	No	No	No	No	No	No	<2
1585	Male	42	<65 years	176	74	23.8895	410	140	80	116	0.9	1	Anterior	No	No	No	Yes	No	No	No	No	Radial	15	45	No	No	Two vessel disease	Non-Proximal LAD	G4	3.75	22	7.2	120	0	No	No	No	No	No	No	No	No	No	No	<2
1586	Male	35	<65 years	172	68	22.9854	390	125	81	125	1	1	Anterior	No	No	No	Yes	No	No	Yes	No	Radial	20	35	No	No	Two vessel disease	Proximal LAD	G5	3.75	26	15	100	0	No	No	No	No	No	No	No	No	No	No	<2
1591	Male	50	<65 years	154	55	23.1911	650	120	80	165	1.2	1	Anterior	No	Yes	Yes	Yes	No	No	No	No	Radial	35	40	No	No	Single vessel disease	Non-Proximal LAD	G1	3.5	18	8.1	90	1	No	Yes	No	No	No	No	No	No	No	No	<2
1593	Male	52	<65 years	172	92	31.0979	200	133	89	241	0.7	1	Inferior	No	No	Yes	Yes	Yes	No	No	No	Radial	20	45	No	No	Three vessel disease	Right coronary artery	G5	3.5	22	10.1	120	2	No	No	No	No	No	No	No	No	No	No	≥2
1594	Male	39	<65 years	171	73	24.9649	400	186	76	152	0.4	1	Anterior	No	No	Yes	Yes	No	No	No	No	Radial	15	45	No	No	Two vessel disease	Non-Proximal LAD	G4	3.5	18	8.6	90	1	No	No	No	No	No	No	No	No	No	No	<2
1595	Male	47	<65 years	170	69	23.8754	300	140	81	146	0.7	1	Anterior	No	No	No	Yes	No	No	No	No	Radial	15	45	No	No	Single vessel disease	Proximal LAD	G3	3.5	18	9.2	100	0	No	No	No	No	No	No	No	No	No	No	<2
1596	Male	42	<65 years	173	78	26.0617	200	110	92	110	0.8	1	Anterior	No	No	No	Yes	No	No	No	No	Radial	10	45	No	No	Single vessel disease	Proximal LAD	G3	3.75	18	24.2	200	0	No	No	No	No	No	No	No	No	No	No	<2
1597	Male	53	<65 years	160	72	28.125	690	130	86	357	0.9	1	Inferior	No	No	No	No	Yes	No	No	No	Radial	12	50	No	No	Single vessel disease	Right coronary artery	G5	3.25	60	23.3	140	1	No	No	No	No	No	No	No	No	No	No	<2
1598	Male	67	65 to 75 years	160	63	24.6094	290	120	90	131	0.9	1	Inferior	No	No	No	No	No	No	No	No	Radial	15	45	No	No	Three vessel disease	Right coronary artery	G2	3.5	22	8.3	100	1	No	No	No	No	No	No	No	No	No	No	<2
1607	Female	55	<65 years	165	65	23.8751	400	135	60	128	0.8	1	Inferior with RV	No	No	Yes	No	No	No	No	No	Radial	10	50	No	No	Single vessel disease	Right coronary artery	G4	3.75	26	8.2	80	2	No	No	No	No	No	No	No	No	No	No	≥2
1608	Female	40	<65 years	160	70	27.3438	470	140	40	404	1	1	Inferior	No	Yes	No	No	Yes	No	No	No	Femoral	15	40	Yes	No	Three vessel disease	Right coronary artery	G4	3.75	38	26.6	120	2	No	No	No	No	No	No	No	No	No	No	≥2
1609	Female	55	<65 years	165	65	23.8751	400	135	60	128	1.1	1	Inferior with RV	No	No	Yes	No	No	No	No	No	Radial	10	50	No	No	Single vessel disease	Right coronary artery	G4	3.75	26	8.2	80	2	No	No	No	No	No	No	No	No	No	No	≥2
1617	Male	55	<65 years	170	75	25.9516	240	153	70	114	1.1	1	Inferior with RV	No	No	No	Yes	No	No	No	No	Radial	10	50	No	No	Single vessel disease	Right coronary artery	G5	4	22	8.7	100	0	No	No	No	No	No	No	No	No	No	No	<2
1618	Male	55	<65 years	170	75	25.9516	240	153	70	114	0.6	1	Inferior with RV	No	No	No	Yes	No	No	No	No	Radial	10	50	No	No	Single vessel disease	Right coronary artery	G5	4	22	8.7	100	0	No	No	No	No	No	No	No	No	No	No	<2
1621	Male	55	<65 years	172	85	28.7317	560	120	70	140	0.8	1	Anterior	Yes	Yes	No	Yes	No	No	No	No	Femoral	10	40	No	No	Single vessel disease	Proximal LAD	G3	3.75	34	9.8	80	0	No	No	No	No	No	No	No	No	No	No	<2
1622	Male	55	<65 years	172	85	28.7317	560	120	70	140	0.9	1	Anterior	Yes	Yes	No	Yes	No	No	No	No	Femoral	10	40	No	No	Single vessel disease	Proximal LAD	G3	3.75	34	9.8	80	0	No	No	No	No	No	No	No	No	No	No	<2
1625	Male	69	65 to 75 years	173	78	26.0617	160	130	40	201	1.5	2	Inferior with RV	No	Yes	Yes	No	Yes	No	Yes	No	Radial	21	50	Yes	No	Three vessel disease	Right coronary artery	G5	3.25	23	11	25	4	Yes	Yes	No	No	No	No	No	No	Yes	No	≥2
1637	Male	45	<65 years	170	85	29.4118	420	110	100	177	0.7	1	Anterior	No	No	No	No	No	No	No	No	Radial	20	50	No	No	Single vessel disease	Proximal LAD	G2	3.75	38	7.1	100	0	No	No	No	No	No	No	No	No	No	No	<2
1639	Male	45	<65 years	170	85	29.4118	420	110	100	177	0.8	1	Anterior	No	No	No	No	No	No	No	No	Radial	20	50	No	No	Single vessel disease	Proximal LAD	G2	3.75	38	7.1	100	0	No	No	No	No	No	No	No	No	No	No	<2
1644	Male	50	<65 years	170	72	24.9135	344	120	70	140	0.9	1	Inferior	No	No	No	No	No	No	No	No	Radial	20	50	No	No	Single vessel disease	Right coronary artery	G4	3.75	12	16.4	180	0	No	No	No	No	No	No	No	No	No	No	<2
1647	Male	50	<65 years	175	80	26.1224	330	110	80	126	1.1	1	Inferior with RV	No	No	No	No	No	No	No	No	Radial	12	55	No	No	Three vessel disease	Right coronary artery	G5	3.5	18	15	90	0	No	No	No	No	No	No	No	No	No	No	<2
1649	Male	55	<65 years	173	79	26.3958	330	197	88	155	0.9	1	Anterior	No	No	Yes	Yes	No	No	No	No	Radial	18	50	No	No	Two vessel disease	Left main	G5	4	38	25.2	150	1	No	No	No	No	No	No	No	No	No	No	<2
1650	Male	42	<65 years	170	69	23.8754	200	160	90	93	0.91	1	Anterior	No	No	Yes	Yes	No	No	No	No	Femoral	20	45	No	No	Two vessel disease	Non-Proximal LAD	G4	2.75	26	20	100	1	No	Yes	No	No	No	No	No	No	No	No	<2
1655	Male	50	<65 years	170	69	23.8754	280	150	60	148	1.2	1	Inferior	No	No	Yes	Yes	No	No	No	No	Radial	15	45	No	No	Two vessel disease	Right coronary artery	G3	3.75	38	20	100	1	No	No	No	No	No	No	No	No	No	No	<2
1662	Male	45	<65 years	170	76	26.2976	630	110	80	110	0.9	1	Anterior	No	No	No	No	No	No	Yes	No	Radial	15	30	No	No	Single vessel disease	Proximal LAD	G4	3.5	12	7.9	100	0	No	No	No	No	No	No	No	No	No	No	<2
1664	Male	65	65 to 75 years	165	78	28.6501	680	158	60	90	0.7	1	Inferior	No	No	Yes	No	No	No	No	No	Radial	18	55	No	No	Two vessel disease	Right coronary artery	G5	3.75	22	19.2	100	2	No	No	No	No	No	No	No	No	No	No	≥2
1666	Male	60	<65 years	165	77	28.2828	280	110	80	119	0.9	1	Inferior	No	No	Yes	No	No	No	No	No	Radial	15	50	No	No	Three vessel disease	Right coronary artery	G1	3.75	37	7.3	100	1	No	No	No	No	No	No	No	No	No	No	<2
1669	Male	45	<65 years	170	73	25.2595	160	133	75	138	1.1	1	Inferior with RV	No	No	No	No	No	No	No	No	Femoral	15	45	Yes	No	Two vessel disease	Right coronary artery	G4	3.5	15	8.2	80	0	No	No	No	No	No	No	No	No	No	No	<2
1670	Male	50	<65 years	171	82	28.0428	230	132	103	100	1.1	1	Anterior	No	No	No	No	No	No	No	No	Radial	18	40	No	No	Single vessel disease	Proximal LAD	G4	4	18	21.7	130	0	No	No	No	No	No	No	No	No	No	No	<2
1674	Male	55	<65 years	170	70	24.2215	450	130	75	155	1.1	1	Inferior	No	No	No	No	No	No	No	No	Radial	15	45	No	No	Two vessel disease	Left circumflex	G4	3.5	12	20	150	0	No	No	No	No	No	No	No	No	No	No	<2
1676	Male	30	<65 years	168	70	24.8016	310	130	70	110	1	1	Inferior	No	No	No	Yes	No	No	No	No	Radial	8	50	No	No	Single vessel disease	Right coronary artery	G4	3.75	19	8	70	0	No	No	No	No	No	No	No	No	No	No	<2
1681	Male	60	<65 years	158	70	28.0404	210	90	130	105	0.9	2	Anterior	No	No	No	No	No	No	Yes	No	Femoral	20	45	No	No	Three vessel disease	Non-Proximal LAD	G5	3.5	76	16.2	150	1	No	No	No	No	No	No	No	No	No	No	<2
1684	Male	50	<65 years	172	76	25.6896	120	100	76	156	1	1	Anterior	No	No	Yes	No	No	No	No	No	Radial	15	55	No	No	Three vessel disease	Right coronary artery	G5	3.75	38	16.7	200	1	No	No	No	No	No	No	No	No	No	No	<2
1689	Male	50	<65 years	170	70	24.2215	270	140	65	90	0.8	2	Inferior with RV	No	No	No	No	No	No	Yes	No	Radial	15	50	No	No	Single vessel disease	Right coronary artery	G5	3.75	26	15	150	1	No	No	No	No	No	No	No	No	No	No	<2
1695	Male	50	<65 years	168	78	27.6361	270	110	90	170	0.7	1	Anterior	No	No	No	No	No	No	No	No	Radial	20	45	No	No	Two vessel disease	Non-Proximal LAD	G1	3.25	32	21	120	0	No	No	No	No	No	No	No	No	No	No	<2
1697	Male	60	<65 years	165	70	25.7117	170	120	80	108	0.8	1	Inferior	No	No	No	No	No	No	No	No	Radial	14	45	No	No	Two vessel disease	Proximal LAD	G5	3.75	22	14	100	0	No	No	No	No	No	No	No	No	No	No	<2
1701	Male	40	<65 years	173	74	24.7252	430	130	65	163	0.7	1	Inferior - Posterior	No	No	No	No	No	No	No	No	Radial	15	45	No	No	Two vessel disease	Right coronary artery	G5	3.75	22	5.1	70	0	No	No	No	No	No	No	No	No	No	No	<2
1702	Male	51	<65 years	176	90	29.0548	350	160	100	219	0.8	1	Inferior with RV	Yes	No	Yes	No	Yes	No	No	No	Femoral	15	45	No	No	Single vessel disease	Right coronary artery	G5	3.75	30	9.5	100	2	No	No	No	No	No	No	No	No	No	No	≥2
1703	Male	39	<65 years	174	73	24.1115	180	160	76	150	0.9	1	Inferior	No	No	No	Yes	No	No	No	No	Radial	12	45	No	No	Two vessel disease	Right coronary artery	G5	3.75	26	10.8	100	0	No	No	No	No	No	No	No	No	No	No	<2
1704	Male	80	>75 years	160	63	24.6094	410	110	80	96	0.6	1	Inferior	No	No	Yes	Yes	No	No	No	No	Femoral	12	50	No	No	Three vessel disease	Right coronary artery	G5	3	52	33	200	3	No	No	No	No	No	No	No	No	No	No	≥2
1705	Male	65	65 to 75 years	170	70	24.2215	210	100	53	165	0.9	1	Inferior	No	Yes	No	Yes	No	No	Yes	No	Radial	20	35	Yes	No	Two vessel disease	Right coronary artery	G5	3.75	34	34.5	150	1	No	No	No	No	No	No	No	No	No	No	<2
1707	Male	62	<65 years	173	75	25.0593	450	110	80	174	0.8	1	Inferior - Posterior	No	No	No	No	Yes	No	No	No	Radial	15	40	No	No	Single vessel disease	Left circumflex	G5	3.75	30	23	150	1	No	No	No	No	No	No	No	No	No	No	<2
1708	Male	50	<65 years	170	68	23.5294	430	129	90	127	1.1	1	Anterior	No	No	Yes	No	No	No	Yes	No	Radial	20	30	No	No	Single vessel disease	Proximal LAD	G4	3.75	26	16.3	120	1	No	No	No	No	No	No	No	No	No	No	<2
1709	Male	50	<65 years	172	74	25.0135	660	180	100	205	0.8	2	Anterior	No	No	Yes	No	Yes	No	Yes	No	Radial	20	40	No	No	Three vessel disease	Proximal LAD	G3	3	15	6.6	90	3	No	No	No	No	No	No	No	No	No	No	≥2
1711	Male	57	<65 years	175	80	26.1224	240	150	83	183	0.8	1	Inferior with RV	No	No	Yes	No	No	No	No	No	Radial	15	50	No	No	Single vessel disease	Left circumflex	G5	2.75	30	7.9	100	1	No	No	No	No	No	No	No	No	No	No	<2
1723	Male	50	<65 years	170	78	26.9896	210	160	80	112	1	1	Anterior	No	No	No	Yes	No	No	No	No	Radial	15	45	No	No	Single vessel disease	Non-Proximal LAD	G3	3.25	16	6.6	120	0	No	No	No	No	No	No	No	No	No	No	<2
1724	Male	50	<65 years	170	78	26.9896	210	160	80	112	1	1	Anterior	No	No	No	Yes	No	No	No	No	Radial	15	45	No	No	Single vessel disease	Non-Proximal LAD	G3	3.25	16	6.6	120	0	No	No	No	No	No	No	No	No	No	No	<2
1729	Male	40	<65 years	170	70	24.2215	260	170	109	130	1	1	Inferior	No	No	No	No	No	No	No	No	Radial	10	40	No	No	Three vessel disease	Right coronary artery	G5	3.25	54	9.3	120	0	No	No	No	No	No	No	No	No	No	No	<2
1732	Male	51	<65 years	172	72	24.3375	160	150	80	119	1	1	Inferior	No	No	No	Yes	No	No	No	No	Radial	10	45	No	No	Three vessel disease	Right coronary artery	G5	3.5	40	18.8	130	0	No	No	No	No	No	No	No	No	No	No	<2
1736	Male	51	<65 years	167	78	27.968	150	140	80	138	0.8	1	Inferior with RV	No	No	No	Yes	No	No	No	No	Radial	13	50	No	No	Three vessel disease	Right coronary artery	G5	3.5	38	18.8	100	0	No	No	No	No	No	No	No	No	No	No	<2
1738	Male	45	<65 years	165	80	29.3848	670	140	80	100	0.7	1	Lateral	No	No	No	No	No	No	No	No	Femoral	15	45	No	No	Single vessel disease	Left circumflex	G2	3.25	20	8.4	100	0	No	No	No	No	No	No	No	No	No	No	<2
1739	Male	53	<65 years	160	78	30.4688	670	90	78	468	1	2	Anterior	No	No	Yes	No	Yes	Yes	Yes	No	Radial	25	30	No	No	Single vessel disease	Proximal LAD	G5	3.5	38	17.2	170	5	Yes	No	No	No	No	No	No	No	No	No	≥2
1740	Male	55	<65 years	168	77	27.2817	360	120	70	130	1	1	Anterior	No	No	Yes	No	No	No	Yes	No	Radial	20	35	No	No	Single vessel disease	Non-Proximal LAD	G2	3.25	32	11.4	100	1	No	Yes	No	No	No	No	No	No	No	No	<2
1745	Male	44	<65 years	156	87	35.7495	350	145	89	199	0	1	Anterior	No	No	Yes	No	No	No	No	No	Radial	20	50	No	No	Single vessel disease	Non-Proximal LAD	G2	3.5	16	14.5	150	1	No	Yes	No	No	No	No	No	No	No	No	<2
1759	Male	54	<65 years	160	80	31.25	270	145	95	200	0.8	1	Inferior with RV	No	No	Yes	Yes	No	No	No	No	Radial	13	50	No	No	Three vessel disease	Right coronary artery	G2	3.5	29	10	100	1	No	No	No	No	No	No	No	No	No	No	<2
1761	Male	69	65 to 75 years	170	70	24.2215	150	145	90	129	0.9	1	Inferior - Posterior	No	No	Yes	No	No	No	No	No	Femoral	18	45	No	No	Single vessel disease	Left circumflex	G2	3.25	12	8.2	80	2	No	Yes	No	No	No	No	No	No	No	No	≥2
1762	Male	42	<65 years	163	70	26.3465	90	130	110	136	1.2	1	Anterior	No	No	No	No	No	No	No	No	Radial	12	60	No	No	Single vessel disease	Non-Proximal LAD	G4	3.25	38	24	150	0	No	No	No	No	No	No	No	No	No	No	<2
1763	Male	47	<65 years	172	73	24.6755	420	112	64	113	1	1	Inferior	No	No	No	Yes	No	No	No	No	Radial	12	45	No	No	Single vessel disease	Right coronary artery	G5	3.75	12	11.1	90	0	No	No	No	No	No	No	No	No	No	No	<2
1765	Male	60	<65 years	160	65	25.3906	380	130	80	219	0.9	1	Anterior	No	No	Yes	Yes	No	No	No	No	Radial	22	45	No	No	Two vessel disease	Non-Proximal LAD	G2	3.25	30	14.9	180	1	No	Yes	No	No	No	No	No	No	No	No	<2
1766	Male	44	<65 years	175	85	27.7551	180	145	90	120	0.9	1	Anterior	No	No	No	Yes	No	No	No	No	Radial	20	45	No	No	Single vessel disease	Proximal LAD	G3	3.5	38	22.5	200	0	No	Yes	No	No	No	No	No	No	No	No	<2
1767	Male	56	<65 years	159	75	29.6665	540	120	50	119	1	1	Inferior - Posterior	No	No	Yes	No	No	No	No	No	Radial	15	50	No	No	Two vessel disease	Left circumflex	G2	3.25	26	8	100	1	No	No	No	No	No	No	No	No	No	No	<2
1768	Male	65	65 to 75 years	170	72	24.9135	240	115	90	119	1.5	1	Inferior with RV	No	Yes	No	Yes	No	No	No	No	Radial	14	50	Yes	No	Single vessel disease	Right coronary artery	G3	3.75	22	11.1	120	1	No	Yes	No	No	No	No	No	No	No	No	<2
1772	Male	47	<65 years	176	95	30.6689	280	170	90	148	0.8	1	Inferior with RV	No	No	Yes	Yes	No	No	Yes	No	Femoral	18	35	No	No	Two vessel disease	Right coronary artery	G5	3.75	22	10	100	1	Yes	Yes	No	No	No	No	No	No	No	No	<2
1773	Male	65	65 to 75 years	179	79	24.6559	290	170	96	129	1.1	1	Anterior	No	No	No	No	No	No	Yes	No	Radial	22	30	No	No	Single vessel disease	Non-Proximal LAD	G4	3.75	18	6	70	1	Yes	Yes	No	No	No	No	No	No	No	No	<2
1776	Male	43	<65 years	170	66	22.8374	260	90	54	146	1	1	Anterior	No	No	No	No	No	No	No	No	Radial	18	50	No	No	Single vessel disease	Proximal LAD	G5	4	15	12	150	0	No	No	No	No	No	No	No	No	No	No	<2
1778	Male	65	65 to 75 years	175	76	24.8163	660	185	80	218	0.7	1	Inferior with RV	No	No	Yes	Yes	Yes	No	No	No	Radial	10	45	No	No	Two vessel disease	Right coronary artery	G5	3.25	18	10.4	100	3	No	No	No	No	No	No	No	No	No	No	≥2
1779	Male	60	<65 years	169	65	22.7583	430	156	120	261	1	1	Inferior with RV	No	No	Yes	No	Yes	No	No	No	Radial	15	45	No	No	Two vessel disease	Right coronary artery	G5	3.75	30	11.6	140	2	No	No	No	No	No	No	No	No	No	No	≥2
1782	Male	60	<65 years	156	75	30.8185	310	120	90	156	0.9	1	Inferior with RV	No	No	Yes	No	No	No	No	No	Radial	15	45	No	No	Two vessel disease	Right coronary artery	G2	3.25	38	13.9	120	1	Yes	Yes	No	No	No	No	No	No	No	No	<2
1783	Female	50	<65 years	159	70	27.6888	270	120	80	241	0.3	1	Inferior - Posterior	No	No	Yes	No	Yes	No	No	No	Radial	18	50	No	No	Two vessel disease	Left circumflex	G1	3.25	22	8.3	100	3	No	Yes	No	No	No	No	No	No	No	No	≥2
1784	Female	60	<65 years	158	65	26.0375	420	120	90	380	0.1	1	Posterior	No	No	Yes	No	Yes	No	No	No	Radial	12	55	No	No	Two vessel disease	Left circumflex	G1	4	22	25	100	3	No	No	No	No	No	No	No	No	No	No	≥2
1785	Female	65	65 to 75 years	159	67	26.5021	690	120	45	88	0.7	1	Inferior with RV	No	No	No	No	No	No	No	No	Radial	18	60	No	No	Single vessel disease	Right coronary artery	G3	3.75	22	10.1	100	2	No	No	No	No	No	No	No	No	No	No	≥2
1786	Male	50	<65 years	190	82	22.7147	530	130	90	310	0.5	1	Inferior	No	No	Yes	Yes	Yes	No	No	No	Radial	18	55	No	No	Two vessel disease	Right coronary artery	G1	3.5	34	9.4	100	2	Yes	No	No	No	No	No	No	No	No	No	≥2
1790	Male	42	<65 years	171	70	23.939	340	123	60	233	0.5	1	Inferior	No	No	Yes	Yes	No	No	No	No	Radial	12	50	No	No	Two vessel disease	Non-Proximal LAD	G4	3.75	22	10	120	1	No	No	No	No	No	No	No	No	No	No	<2
1791	Male	54	<65 years	174	72	23.7812	270	123	80	281	1	1	Anterior	No	No	No	Yes	Yes	No	Yes	No	Radial	20	35	No	No	Three vessel disease	Non-Proximal LAD	G4	3.25	15	9	100	1	No	No	No	No	No	No	No	No	No	No	<2
1797	Female	45	<65 years	168	65	23.03	440	120	80	120	0.9	1	Anterior	No	No	Yes	No	No	No	No	No	Radial	19	50	No	No	Single vessel disease	Non-Proximal LAD	G3	3.5	15	6.5	80	2	No	No	No	No	No	No	No	No	No	No	≥2
1798	Female	40	<65 years	150	75	33.3333	720	120	80	145	0.5	1	Anterior	No	No	No	No	No	No	Yes	No	Radial	20	35	No	No	Single vessel disease	Non-Proximal LAD	G2	3.75	31	6.8	100	1	No	Yes	No	No	No	No	No	No	No	No	<2
1799	Male	66	65 to 75 years	167	90	32.2708	690	120	90	200	0.7	1	Inferior - Posterior	No	No	Yes	No	Yes	No	No	No	Radial	20	45	No	No	Two vessel disease	Left main	G2	4.5	23	37	150	3	No	No	No	No	No	No	No	No	No	No	≥2
1801	Female	42	<65 years	166	95	34.4753	290	120	80	200	0.6	1	Anterior	No	No	No	No	No	No	No	No	Radial	16	50	No	No	Single vessel disease	Proximal LAD	G3	3.75	26	20	150	1	No	Yes	No	No	No	No	No	No	No	No	<2
1803	Male	55	<65 years	172	70	23.6614	240	100	80	120	1.2	1	Anterior	No	No	No	No	No	No	No	No	Femoral	10	50	No	No	Single vessel disease	Proximal LAD	G1	3.5	15	25.6	120	0	No	No	No	No	No	No	No	No	No	No	<2
